1 Genetic mapping of craniofacial traits in the Mexican tetra reveals loci associated with  
2 bite differences between cave and surface fish

3

4 Amanda K. Powers<sup>1</sup>, Carole Hyacinthe<sup>1</sup>, Misty Riddle<sup>2</sup>, Young Kwang Kim<sup>3</sup>, Alleigh  
5 Amaismeier<sup>4</sup>, Kathryn Thiel<sup>4</sup>, Brian Martineau<sup>1</sup>, Emma Ferrante<sup>1</sup>, Rachel Moran<sup>5</sup>,  
6 Suzanne McGaugh<sup>6</sup>, Tyler Boggs<sup>7</sup>, Joshua B. Gross<sup>7</sup> and Clifford J. Tabin<sup>1\*</sup>

7

8 <sup>1</sup>Department of Genetics, Blavatnik Institute at Harvard Medical School, 77 Avenue  
9 Louis Pasteur, Boston, MA 02115

10 <sup>2</sup>Department of Biology, University of Nevada, Reno, 1664 N. Virginia St., Reno, NV  
11 89557

12 <sup>3</sup>Harvard School of Dental Medicine, 188 Longwood Ave., Boston, MA 02115

13 <sup>4</sup>Department of Biology, Xavier University, 3800 Victory Pkwy., Cincinnati, OH 45207

14 <sup>5</sup>Department of Biology, Texas A & M University, 100 Butler Hall, College Station, TX  
15 77843

16 <sup>6</sup>Department of Ecology, Evolution and Behavior, University of Minnesota, 1500 Gortner  
17 Ave., Saint Paul, MN 55108

18 <sup>7</sup>Department of Biological Sciences, University of Cincinnati, 312 College Dr.,  
19 Cincinnati, OH 45221

20

21 Running title: Evolved bite differences in cavefish correlate with changes in feeding  
22 strategy

23 Keywords: Jaws; teeth; Meckel's cartilage; Quantitative trait loci; cavefish

24 **Abstract**

25           The Mexican tetra, *Astyanax mexicanus*, includes interfertile surface-dwelling  
26 and cave-dwelling morphs, enabling powerful studies aimed at uncovering genes  
27 involved in the evolution of cave-associated traits. Compared to surface fish, cavefish  
28 harbor several extreme traits within their skull, such as a protruding lower jaw, a wider  
29 gape, and an increase in tooth number. These features are highly variable between  
30 individual cavefish and even across different cavefish populations. To investigate these  
31 traits, we created a novel feeding behavior assay wherein bite impressions could be  
32 obtained. We determined that fish with an underbite leave larger bite impressions with  
33 an increase in the number of tooth marks. Capitalizing on the ability to produce hybrids  
34 from surface and cavefish crosses, we investigated genes underlying these segregating  
35 orofacial traits by performing Quantitative Trait Loci (QTL) analysis with F<sub>2</sub> hybrids. We  
36 discovered significant QTL for bite (underbite vs. overbite) that mapped to a single  
37 region of the *Astyanax* genome. This work highlights cavefish as a valuable genetic  
38 model for orofacial patterning and will provide insight into the genetic regulators of jaw  
39 and tooth development.

40

41

42

43

44

45

46

## 47 **Introduction**

48           One of the hallmarks of early vertebrate evolution is the biting jaw (de Beer,  
49 1937; Romer, 1941). Because the mandibular arch can be found in jawless fishes such  
50 as lamprey and hagfish, it is likely that the morphological identity of lower jaw  
51 components (i.e. pharyngeal arches) was present in a common ancestor to the jawless  
52 cyclostomes and jawed gnathostomes (Kuratani, 2012). Among other cranial bones, the  
53 lower jaw is highly conservative across vertebrates from extinct armored placoderms to  
54 living tetrapods (Long, 2016), suggesting conserved genetic networks govern jaw  
55 development.

56           The emergence of diversity in jaw morphology is linked to feeding ecology (Hill et  
57 al. 2018). Classic examples of adaptive radiations, such as beak shape in Darwin's  
58 finches (Abzhanov et al. 2006) and jaw diversity in cichlids (Husley et al. 2010), occur  
59 through the expansion into new feeding niches, leading to extreme changes in  
60 morphology and in some cases speciation events. Cichlids exhibit a spectrum of  
61 variation in their oral jaws, from short jaws amenable to biting hard surfaces to  
62 elongated jaws for suction feeding (Powder & Alberston, 2016). The emergence of  
63 these morphological changes is integrated in environmental and ecological pressures.

64           Perhaps one of the most extreme environmental pressures an organism can face  
65 is the subterranean habitat. Obligate cave-dwellers face perpetual darkness, scarce  
66 food sources and isolation from other ecosystems. Despite these challenges, cave  
67 organisms thrive in this environment. For example, *Astyanax mexicanus* cavefish have  
68 evolved physiological and morphological traits suited for life in complete darkness, such  
69 as starvation resistance (Aspiras et al. 2015; Xiong et al. 2018, Riddle & Aspiras et al.

70 2018), enhancement of sensory systems (Jeffery, 2001; Yoshizawa et al. 2014;  
71 Wilkens, 2020), sleep loss/constant foraging (Duboué et al. 2011), and changes to their  
72 immune system (Peuß et al. 2020), relative to extant surface-dwelling fish. In addition to  
73 these changes, cavefish harbor extreme changes in morphology, including several  
74 craniofacial traits, such as cranial bone fragmentations and spontaneous fusions, as  
75 well as fluctuating and directional asymmetries (Gross & Powers, 2020). These  
76 craniofacial features are highly variable across both individual cavefish, as well as the  
77 ~30 known *Astyanax* cavefish populations found in northeastern Mexico. Within their  
78 oral jaws, adult cavefish exhibit an increase in both upper and lower jaw dentition (tooth  
79 number) compared to surface fish (Atukorala et al. 2013). Further, larval cavefish have  
80 wider and more protruding lower jaws (Jeffery, 2001; Yamamoto et al. 2009).

81 An elongation of the lower jaw is not unique to the blind Mexican cavefish,  
82 however. Protruding lower jaws have been characterized in cavefish across the globe  
83 including the Chinese cavefish (*Sinocyclocheilus*; Ma et al. 2019), the cavefish of the  
84 Ozarks (*Amblyopsis rosae*; Romero, 2009), and an Australian cavefish (*Milyeringa*  
85 *brooksi*; Chakrabarty, 2010). This parallel evolution of changes in the lower jaw  
86 suggests a possible adaptive significance.

87 Toward that end, we set out to characterize changes in lower jaw morphology in  
88 adult *Astyanax* cavefish using morphological, behavioral, and genetic analyses. We  
89 discovered that the wider, protruding lower jaws observed in larval cavefish persist in  
90 the adult cranium, resulting in an underbite compared to the slight overbite or normal  
91 occlusion found in surface fish. To determine if the underbite is of functional importance,  
92 we assessed the maximum gape (mouth opening) and feeding behavior using a novel

93 feeding assay. Further, we capitalized on the ability to generate viable hybrids from  
94 surface x cavefish crosses and employed a genetic association study to illustrate that  
95 bite differences are under genetic control in *A. mexicanus*. Next, we were able to  
96 pinpoint an associated region in the genome and generate a subsequent list of  
97 candidate genes for this trait. Together, our analyses reveal a novel role for differences  
98 in jaw morphology and tooth patterning in cavefish that likely evolved as an alternative  
99 feeding strategy in nutrient poor caves.

100

## 101 **Materials and Methods**

102

### 103 *Fish Husbandry and Specimens*

104 Fish were bred and maintained in the laboratory of Dr. Clifford Tabin at Harvard  
105 Medical School on a custom recirculating system (Temperature: 23C, pH: 7-7.5, and  
106 Conductivity: 1200-1400uS) under a 12 hour light/dark cycle. F<sub>1</sub> hybrids were generated  
107 from a paired mating of male *Astyanax mexicanus* surface fish (derived from the Río  
108 Choy river) and female Pachón cavefish. The genetic mapping pedigree was made up  
109 of F<sub>2</sub> hybrids (n=219) from three clutches from F<sub>1</sub> surface x Pachón hybrid siblings. For  
110 behavioral analysis a second F<sub>2</sub> population (n=30) was generated from a single cross of  
111 F<sub>1</sub> siblings. It has been previously determined that there is no maternal effect on jaw  
112 morphology for hybrid crosses by looking at reciprocal hybrids (Ma et al. 2018). All  
113 procedures were approved under IACUC protocol (#IS00001612).

114

### 115 *Feeding behavior assay*

116 We created “food carpet” molds that were placed at the bottom of assay tanks,  
117 from which we could recover bite impressions. Solidified gelatinous food carpets were  
118 made using comestible gelatin (Knox). Gelatin powder was melted in boiled, filtered  
119 reverse osmosis water and mixed with a solution base of infused fish pellets (New Life  
120 Spectrum Thera+A) using an electric kettle (Muller) in a ratio of 1:1. The warm liquid mix  
121 was poured into silicone molds, chilled at room temperature and stored overnight at 4°C  
122 for solidification. Molds with solidified gelatin were placed at the bottom of recording  
123 tanks filled with water, occupying the entire bottom of the tank as a “food carpet” (Fig.  
124 2A-D).

125 The feeding behavior assay was performed on n=5 surface fish, n= 5 Pachón  
126 cavefish as well as n=20 F<sub>2</sub> hybrids recorded in 1.7L tanks, set up in an insulated  
127 chamber. Each fish was recorded in complete dark conditions for 1h with a HD infrared  
128 camera (Grundig Pro, Germany). All assays were watched live to control for actual  
129 feeding episodes; feeding episodes are described here as active mouth-picking on the  
130 “food carpet”. After 1h of trial, fish were returned to their housing tank and food carpets  
131 were extracted from recording tanks. Food carpets were dried for ~12 hrs in a low  
132 humidity room and imaged under a light stereomicroscope (Leica M165FC) at 32x  
133 magnification (Fig. 2E-H).

134 Tanks were filmed via a front-facing camera and videos were acquired through  
135 Open Broadcaster Software (OBS) studio in “.avi” format. Videos were manually  
136 analyzed with Odrec software (S. Pean, IFREMER, France) to quantify the average and  
137 maximum body angles adopted by the fish over 1h periods for each feeding episode

138 (Fig. S1). Accurate measures of the body angle were facilitated with a protractor  
139 overlaid directly on the tank in 10° quadrants (Fig. 2A-D).

140

#### 141 *Phenotypic analysis*

142 To assess the maximum mouth opening (“gape”), specimens (n=8 from each  
143 group) were sacrificed using a lethal dose (400ppm) of tricaine (MS-222; Sigma) and  
144 immediately imaged under light microscopy at 20x before rigor mortis set in to maintain  
145 flexibility in the jaw joints. Upper and lower jaws were pinned using Styrofoam backing  
146 at the maximum gape (Fig. 1A, D). Gape was measured as the angle at the intersect of  
147 the maxillary and dentary (lower jaw) bones using the angle tool in ImageJ software  
148 (v2.0.0-rc-69). An analysis of variance (ANOVA) and post hoc Tukey’s HSD were  
149 performed using R studio software (v2022.07.2; Table S1). Lower jaw length was  
150 measured in F<sub>2</sub> hybrids (n=186) using the line tool in ImageJ and normalized to fish  
151 standard length (Fig. 2I). For pairwise comparisons, a t-test comparison of means  
152 (StatPlus:mac LE v6.2.21) was used to test for statistical significance.

153 For three-dimensional analysis, high resolution micro-computed tomography  
154 (MicroCT) imaging was performed at the Center for Advanced Orthopaedic Studies at  
155 the Beth Israel Deaconess Medical Center (Boston, MA). MicroCT scans were  
156 performed on Pachón cavefish (n=5), surface fish (n=5), F<sub>1</sub> (n=5) and F<sub>2</sub> hybrids  
157 (n=219) at 15uM resolution producing ~500 DICOM formatted images per specimen  
158 that were reconstructed into a single three-dimensional volume rendered file using  
159 Amira software (v6.0; FEI Company, Hillsboro, OR) according to methods outlined in  
160 Powers et al. 2017.

161

## 162 *Quantitative Trait Loci (QTL) analysis*

163 R/qtl (v1.46-2; Broman et al. 2003) was used to perform QTL analysis according  
164 to methods outlined in Riddle et al. 2020. Briefly, a linkage map was constructed using  
165 loci identified from genotyping-by-sequencing (GBS) technology. The linkage map  
166 consisted of 1,839 GBS markers from 219 F<sub>2</sub> individuals assembled into 25 linkage  
167 groups (Riddle et al. 2020). A genome-wide logarithm of odds (LOD) score was  
168 calculated for the “bite” phenotype. Bite was scored as a binary trait; overbite was  
169 scored as 0 and underbite was scored as 1 (Fig. 3A). Peak markers rising above the  
170 significant LOD threshold were extracted and phenotypic effect plots were generated to  
171 determine which genotypes were associated with bite differences (Fig. 3E).

172 Markers within the critical QTL region were mapped to the Pachón cavefish  
173 genome (AstMex102) scaffolds (Riddle et al. 2020) and the surface fish genome (*A.*  
174 *mexicanus* genome 2.0) chromosomes using the BLAST algorithm (Ensembl v108). The  
175 associated regions between the linkage map (LG1), cavefish genome scaffolds, and  
176 surface fish genome were visualized by generating a Circos plot (Fig. 4; Krzywinski et  
177 al. 2009). A candidate gene list was extracted from an ~8Mb region on chromosome 7  
178 using a custom pipeline outlined in Moran et al. 2022.

179

## 180 *Sequence Analysis*

181 A population genomic analysis was performed using DNA from wild-caught  
182 specimens from Río Gallinas (surface fish Rascón population), Río Choy (surface fish  
183 Choy population from which laboratory surface fish are derived), as well as Pachón,



184 Tinaja and Molino caves in Mexico. We used a n=10 per population for sequence  
185 assessment. Population genomic metrics and analysis procedures are outlined in Riddle  
186 et al. 2021. cDNA sequences were aligned using SnapGene (v6.1.2), from which fixed  
187 coding sequence changes were noted (Table 1). We identified known zebrafish, mouse  
188 and human phenotypes associated with candidate genes using the BioMart tool in  
189 Ensembl (v104; Moran et al. 2022).

190

## 191 **Results**

192

### 193 *Cavefish exhibit differences in jaw morphology compared to surface fish*

194 Cavefish harbor an underbite, compared to an overbite or even occlusion in  
195 surface fish, which manifests as an elongated lower jaw and a wider mouth opening or  
196 “gape” (Fig. 1 A, D). Gape was measured by taking the maximum angle of the maxillary  
197 bone to the lateral mandible. Cavefish averaged a significantly higher gape angle  
198 ranging from 130°-139° (mean= 136°), compared to a range of 96°-116° in surface fish  
199 (mean =106°; Fig. 1B). Surface x cavefish F<sub>2</sub> hybrids were separated into “overbite” and  
200 “underbite” groups. F<sub>2</sub> hybrids scored as having an overbite had an average gape angle  
201 of 116°, compared to an average angle of 130° in F<sub>2</sub> hybrids with an underbite (Fig. 1B).  
202 An ANOVA revealed significant variation in gape angle across populations (F=18.83;  
203 p<0.001). A post hoc Tukey test showed significant differences between overbite and  
204 underbite groups at p< 0.05 (See Table S1). In addition to a larger gape angle, F<sub>2</sub>  
205 hybrids with an underbite have significantly longer lower jaws (normalized mandible

206 length) compared to overbite F<sub>2</sub> hybrids ( $p < 0.05$ ; Fig. 2I). No sex differences were  
207 observed for any of the jaw morphology metrics analyzed.

208

209 *A novel behavioral assay illustrates that fish with an underbite feed differently on*  
210 *substrate compared to fish with an overbite*

211

212 Cavefish display a difference in feeding posture compared to surface fish  
213 (Schemmel, 1980; Kowalko et al. 2013). To determine if F<sub>2</sub> hybrids with an underbite  
214 feed at a similar angle to cavefish (and if hybrids with an overbite feed like surface fish),  
215 we co-opted the feeding behavior assay used by Kowalko et al. 2013. Consistent with  
216 previous findings, cavefish fed at the expected posture with an average of 54°,  
217 compared to surface fish that fed at an average angle of 80° (Fig. 1C; 2A-B, Fig. S1 A-  
218 B). F<sub>2</sub> hybrids with an overbite displayed a similar feeding angle to surface fish, with  
219 individual trial averages ranging from 76°-81° (post hoc Tukey  $p > 0.05$ ; Fig. 2C).  
220 Surprisingly, F<sub>2</sub> hybrids with an underbite did not recapitulate cavefish feeding posture,  
221 feeding at a wider range of 62°-90° (Fig. 1C; 2D). An ANOVA revealed significant  
222 variation in feeding angle across populations ( $F = 19.01$ ;  $p < 0.001$ ). Further, feeding angle  
223 is negatively correlated with gape angle ( $R = -0.4134$ ; Fig. 1F), suggesting that fish with  
224 a larger gape feed at more acute angles.

225 Despite differing from cavefish feeding posture, F<sub>2</sub> hybrids with an underbite do  
226 display interesting feeding behaviors. Compared to hybrids with an overbite (90°), F<sub>2</sub>  
227 hybrids with an underbite had a maximum feeding behavior of 110°, extending their  
228 lower jaws and feeding at an almost upside-down posture ( $p < 0.001$ ; Fig. 1E; Fig. S1E).

229 Cavefish exhibit an increase in the number of teeth on both the upper and lower jaws  
230 (Atukorala et al. 2013). Tooth number was counted for F<sub>2</sub> hybrids post behavior assay.  
231 There was no significant difference in tooth number in the upper jaw between overbite  
232 and underbite hybrids ( $p>0.05$ ; Fig. 2J). However, F<sub>2</sub> hybrids with an underbite have  
233 significantly more teeth in their lower jaw compared to F<sub>2</sub> hybrids with an overbite  
234 ( $p<0.001$ ; Fig. 2K). Taken together, F<sub>2</sub> hybrids with an underbite have similar  
235 morphology to cavefish, with an elongated lower jaw and an increase in tooth number.

236 We were able to take a closer look at feeding behavior by designing a method for  
237 extracting bite impressions during behavior trials. Food carpets (see Methods) were  
238 used to visualize the number of tooth marks made by a fish during a feeding strike (Fig.  
239 2E-H). Surface fish, feeding at  $\sim 90^\circ$ , were observed using their upper jaw to bite into the  
240 food carpet, leaving smaller bite impressions with an average of 6.7 tooth marks (Fig.  
241 2E, L). In contrast, cavefish were observed using their lower jaws to make larger bite  
242 impressions, averaging 10 tooth marks per bite (Fig. 2F, L). F<sub>2</sub> hybrids with an overbite  
243 displayed similar biting behavior to surface fish, averaging 5.6 tooth marks per bite (Fig.  
244 2G, L). Like cavefish, F<sub>2</sub> hybrids with an underbite made large bite impressions,  
245 averaging 8.6 tooth marks per bite (Fig. 2H, L). An ANOVA revealed significant variation  
246 in gape angle across populations ( $F=10.71$ ;  $p<0.001$ ). A post hoc Tukey test showed  
247 significant differences between overbite and underbite groups at  $p<0.05$  (See Table  
248 S2).

249

250 *Bite differences are under genetic control in Astyanax*

251

252 Quantitative trait loci (QTL) analysis was performed to assess whether bite  
253 differences in cavefish are associated with genetic loci. Within our F<sub>2</sub> mapping pedigree,  
254 ~25% of individuals were scored as having an underbite (Fig. 3B). A significant QTL  
255 peak was recovered for the bite phenotype that rose above the significance threshold  
256 ( $p < 0.05$  LOD is 4.01) with a LOD score of 4.708 on linkage group (LG) 1 (Fig. 3C-D).  
257 The percent variance (PVE) explained by the bite phenotype is 9.4%. Seven genetic  
258 markers reside under the QTL peak with LOD scores ranging from 4.032 to 4.708 along  
259 a ~5cM region on linkage group 1 (Table S3). The phenotypic effect for flanking genetic  
260 markers revealed that the homozygous cavefish genotype is associated with the  
261 underbite phenotype, while the heterozygous and homozygous surface fish genotypes  
262 are associated with an overbite (Fig. 3E).

263 A ~9cM region at the end of LG 1 was anchored to four Pachón cavefish  
264 annotated genome scaffolds (AstMex102; McGaugh et al. 2014; Table S3). The  
265 analogous scaffold regions mapped to an ~8Mb region of chromosome (Chr.) 7 on the  
266 surface fish genome (Warren et al. 2021; Fig. 4). A list of 84 annotated genes was  
267 assembled from the interval of 4 to 12 Mb on Chr. 7 (Fig.4; Table S3).

268

### 269 *Candidate genes for bite differences exhibit genetic alterations*

270

271 To determine if cavefish harbor genetic alterations in candidate genes within the  
272 QTL interval, genomic sequences from wild-caught fish from multiple populations were  
273 assessed. We discovered three genes that had sequence alterations in Pachón  
274 cavefish, and also in two other populations (Molino and Tinaja; Table 1). The gene

275 *RAB19*, a member of the RAS oncogene family, is predicted to have a nonsynonymous  
276 single nucleotide polymorphism resulting in a single amino acid substitution (H164G) in  
277 all three cavefish populations compared to cDNA sequences in both Rascón and Choy  
278 surface fish populations. Next, we discovered a predicted single amino acid substitution  
279 (P412H) only present in the Pachón population for the gene *arfgap3*, known as ADP  
280 ribosylation factor GTPase activating protein 3, compared to surface fish.

281 Three genes with identified genetic alterations have known roles in bone  
282 development and homeostasis. A single amino acid substitution (F310L) was predicted  
283 for the gene *pacsin2*, known as protein kinase C and casein kinase substrate in neurons  
284 protein 2, in the Pachón and Molino populations compared to surface fish. Based on  
285 annotations extracted from BioMart, alterations in the *pacsin2* gene result in abnormal  
286 bone mineralization. Next, a single amino acid substitution (D721N) was predicted for  
287 the gene *LARGE1*, known as large xylosyl- and glucuronyltransferase 1 in all three  
288 cavefish populations. Annotations for the *LARGE1* gene suggest that mutations result in  
289 abnormal tongue morphology and bone structure. Finally, we discovered a putative  
290 deletion, ranging from 1-13 base pairs (potentially impacting amino acid positions 413-  
291 417) depending on the individual cavefish and population, in the gene *USP15*, known as  
292 ubiquitin specific peptidase 15. Alterations to *USP15* result in increased bone mineral  
293 density. Further, *USP15* has been shown to enhance bone morphogenetic protein  
294 signaling by targeting *ALK3/BMPR1A* (Herhaus et al. 2014). While it is presently unclear  
295 how these alternations impact jaw growth in cavefish, these are candidates worth  
296 pursuing in future studies.

297

## 298 **Discussion**

299           Bite morphology is of functional importance for feeding, communicating, and  
300 breathing. As humans evolved smaller jaws, issues of malocclusion, tooth crowding,  
301 and facial pain arose (Kahn et al. 2020). Despite the increased in frequency of these  
302 aberrations, the precise genetic mechanisms controlling jaw size remain unclear. Here,  
303 we capitalize on the natural variation of jaw size and bite differences in divergent forms  
304 of teleost fish. We discovered that bite differences are indeed under genetic control in  
305 cavefish.

306           While the majority of previously studied craniofacial traits appear to be under  
307 complex genetic control in cavefish (Gross et al. 2014), we discovered a single QTL  
308 peak for the bite phenotype, with the frequency near a 3:1 (overbite: underbite) ratio in  
309 the F<sub>2</sub> pedigree, suggesting a Mendelian pattern of inheritance with the surface fish  
310 alleles being dominant. However, the QTL explains <10% of the variance so it is  
311 possible that this is unlikely a monogenic trait and multiple genes or networks may be  
312 impacted. Five of the genes in the QTL region (*RAB19*, *arfgap3*, *pacsin2*, *LARGE1*, and  
313 *USP15*) exhibit fixed nonsynonymous mutations in cavefish compared to surface fish.  
314 We found that some mutations (*RAB19*, *LARGE1*, and *USP15*) were present in all three  
315 populations of the cavefish (Pachón, Molino and Tinaja) we investigated. However,  
316 other mutations were only present in one or two populations compared to the surface  
317 fish. A potential explanation for this is that different cavefish populations may employ  
318 different genetic mechanisms to converge on similar phenotypes. An example of this is  
319 a mutation in the insulin receptor (*insra*) governing glucose intolerance in Pachón and  
320 Tinaja populations, but not Molino (Riddle & Aspiras et al. 2018). While the genes

321 *pacsin2*, *LARGE1*, and *USP15* have been previously implicated in altered bone  
322 mineralization, none of the candidates have been specifically linked to changes in jaw  
323 morphology and may play novel roles in controlling bone size differences. Future  
324 functional analysis studies are needed to uncover the precise role of these genes in jaw  
325 development.

326         It is also possible that bite differences may not be mediated solely by a genetic  
327 mutation affecting the amino acid sequence, but rather a change in temporal or spatial  
328 gene expression during development. Protruding lower jaws have been observed in  
329 larval cavefish (Jeffrey, 2001; Yamamoto et al. 2009), suggesting that lower jaw  
330 cartilage (Meckel's cartilage) may lay down the foundation for jaw size differences  
331 observed in adult skulls. Bone morphogenetic protein (BMP) signaling is a key regulator  
332 of endochondral ossification and has been shown to stimulate cell differentiation during  
333 cartilage development (Kobayashi et al. 2005). Allelic variation and expression of *bmp4*  
334 have been implicated in differences in cichlid jaw shape (Albertson & Kocher, 2006).  
335 One candidate gene exhibiting sequence deletions in cavefish, *USP15*, is a known  
336 regulator of BMP signaling and may play a role in chondrogenesis of the jaw (Herhaus  
337 et al. 2014). Another gene within the QTL region is *wnt7ba*, which together with ortholog  
338 *wnt7bb* are expressed in the developing zebrafish head as early as 24 hours post  
339 fertilization (Duncan et al. 2015) and wnt/beta-catenin signaling has been shown to  
340 induce cartilaginous matrix remodeling (Yuasa & Iwamoto, 2006). Together, *USP15* and  
341 *Wnt7ba* should be further investigated across jaw development to determine if changes  
342 in expression result in an increase in lower jaw cartilage in cavefish.

343           While jaw size and dentition differences have been previously characterized in  
344 cavefish, the evolutionary mechanism underlying these changes remains unclear.  
345 Varying degrees of eye degeneration, shown through lens ablation studies, does not  
346 affect the length of the lower jaw (Duffton et al. 2012) and we observed no overlapping  
347 QTL for eye size, nor did we find any correlations with eye size and any jaw metrics  
348 presented here. Kowalko et al. (2013) determined that cavefish feed at a more acute  
349 angle compared to surface fish, but we did not find that F<sub>2</sub> hybrids exhibiting an  
350 underbite feed at the same posture as cavefish. Further, multiple QTL for feeding angle  
351 were discovered (Kowalko et al. 2013), but do not overlap with the bite phenotype. This  
352 suggests that feeding angle is controlled by a different genetic mechanism than jaw  
353 morphology in cavefish. A previously discovered QTL for jaw angle (ventral jaw width)  
354 does map to chromosome 7, but not at the same genomic position (7:29,668,292-  
355 29,697,069) and a different scaffold (KB871834.1:596.975) than the bite QTL. Another  
356 previously characterized QTL for lower jaw size (Protas et al. 2007) maps to Chr. 14  
357 near the gene *ghrb* (Berning et al. 2019). From these studies we can infer that the size  
358 of the adult lower jaw is likely controlled by different loci than lower jaw protrusion or  
359 bite. Besides bone and cartilage, other features within the cranium may contribute to  
360 bite differences, such as potential muscle or joint differences.

361           While bite differences do not correlate with feeding angle, we did discover that an  
362 underbite is associated with differences in feeding strategy, such that fish with an  
363 underbite used their lower jaws, exposing more teeth in each strike compared to fish  
364 with an overbite. This is consistent with findings in cichlids, wherein fish with shorter,  
365 stout jaws feed on hard substrate, while fish with elongated jaws can range from suction



366 feeders to predators (Albertson et al. 2005). Further, fish exhibiting a short dentary, with  
367 long distances between the quadrate joint and opening/closing ligaments feed on  
368 attached foods, such as algae and microinvertebrates, requiring a greater force to  
369 remove from surfaces (Husley et al. 2010). This is consistent with what surface fish  
370 likely encounter in terms of feeding ecology.

371         In the caves, however, there is no photosynthetic input and few available prey.  
372 Why then would cavefish need to evolve wider, longer jaws with more teeth? Espinasa  
373 et al. (2017) analyzed gut contents from wild-caught cavefish from the Pachón cave  
374 during both the rainy and dry seasons and determined adult cavefish mainly subsist on  
375 a diet of bat guano and detritus. This suggests that cavefish use their larger jaws and  
376 increased tooth number to filter feed through the muddy cave pool floor. Additionally,  
377 cavefish have an increase in tastebud number, both extraorally and specifically within  
378 the lower jaw extending along the lingual epithelium toward the posterior part of the jaw  
379 (Varatharasan et al. 2009). Cavefish may have evolved an increase in jaw size and  
380 wider gape to expose more tastebuds, thus increasing taste sensitivity in a nutrient poor  
381 environment. Alternatively, tooth and jaw differences may have evolved as a  
382 consequence of indirect selection (Jeffery, 2010), wherein sensory enhancements such  
383 as increased cranial innervation (Sumi et al. 2015) and taste bud number were under  
384 selection, causing pleiotropic changes that resulted cranial modifications. Further  
385 studies using genetic perturbations will uncover the precise mechanisms governing  
386 these changes. Taken together, we have established cavefish as a powerful genetic  
387 model for understanding evolutionary changes in morphology and behavior, particularly  
388 in the context of jaw evolution.

389

390

391

392 **References**

393

394 Abzhanov, A., Kuo, W.P., Hartmann, C., Grant, B.R., Grant, P.R. and Tabin, C.J., 2006.

395 The calmodulin pathway and evolution of elongated beak morphology in Darwin's

396 finches. *Nature*, 442(7102), pp.563-567.

397

398 Albertson, R.C., Streelman, J.T., Kocher, T.D. and Yelick, P.C., 2005. Integration and

399 evolution of the cichlid mandible: the molecular basis of alternate feeding

400 strategies. *Proceedings of the National Academy of Sciences*, 102(45), pp.16287-

401 16292.

402

403 Aspiras, A.C., Rohner, N., Martineau, B., Borowsky, R.L. and Tabin, C.J., 2015.

404 Melanocortin 4 receptor mutations contribute to the adaptation of cavefish to nutrient-

405 poor conditions. *Proceedings of the National Academy of Sciences*, 112(31), pp.9668-

406 9673.

407

408 Atukorala, A.D.S., Hammer, C., Dufton, M. and Franz-Odenaal, T.A., 2013. Adaptive

409 evolution of the lower jaw dentition in Mexican tetra (*Astyanax mexicanus*). *Evodevo*,

410 4(1), pp.1-11.

411

412 Berning, D., Adams, H., Luc, H. and Gross, J.B., 2019. In-frame indel mutations in the  
413 genome of the blind Mexican cavefish, *Astyanax mexicanus*. *Genome biology and*  
414 *evolution*, 11(9), pp.2563-2573.

415

416 Broman KW, Wu H, Sen S, Churchill GA (2003) R/qtl: QTL mapping in experimental  
417 crosses. *Bioinformatics* 19:889-890.

418

419 Chakrabarty, P., 2010. Status and phylogeny of Milyeringidae (Teleostei: Gobiiformes),  
420 with the description of a new blind cave-fish from Australia, *Milyeringa brooksi*, n. sp.  
421 *Zootaxa*, 2557(1), pp.19-28.

422

423 De Beer, G.R., 1937. *The development of the vertebrate skull* (No. 566 DEB).

424

425 Dufton, M., Hall, B.K. and Franz-Odenaal, T.A., 2012. Early lens ablation causes  
426 dramatic long-term effects on the shape of bones in the craniofacial skeleton of  
427 *Astyanax mexicanus*. *PLoS One*, 7(11), p.e50308.

428

429 Espinasa, L., Bonaroti, N., Wong, J., Pottin, K., Queinnec, E. and Rétaux, S., 2017.  
430 Contrasting feeding habits of post-larval and adult *Astyanax cavefish*. *Subterranean*  
431 *Biology*, 21, pp.1-17.

432

433 Gross, J.B., Krutzler, A.J. and Carlson, B.M., 2014. Complex craniofacial changes in  
434 blind cave-dwelling fish are mediated by genetically symmetric and asymmetric  
435 loci. *Genetics*, 196(4), pp.1303-1319.

436 Gross, J.B. and Powers, A.K., 2020. A natural animal model system of craniofacial  
437 anomalies: the blind Mexican cavefish. *The Anatomical Record*, 303(1), pp.24-29.

438

439 Herhaus, L., Al-Salihi, M.A., Dingwell, K.S., Cummins, T.D., Wasmus, L., Vogt, J.,  
440 Ewan, R., Bruce, D., Macartney, T., Weidlich, S. and Smith, J.C., 2014. USP15 targets  
441 ALK3/BMPR1A for deubiquitylation to enhance bone morphogenetic protein signalling.  
442 *Open biology*, 4(5), p.140065.

443

444 Hill, J.J., Puttick, M.N., Stubbs, T.L., Rayfield, E.J. and Donoghue, P.C., 2018. Evolution  
445 of jaw disparity in fishes. *Palaeontology*, 61(6), pp.847-854.0

446

447 Hulsey, C.D., Mims, M.C., Parnell, N.F. and Streelman, J.T., 2010. Comparative rates of  
448 lower jaw diversification in cichlid adaptive radiations. *Journal of evolutionary*  
449 *biology*, 23(7), pp.1456-1467.

450

451 Jeffery, W.R., 2001. Cavefish as a model system in evolutionary developmental biology.  
452 *Developmental biology*, 231(1), pp.1-12.

453

454 Jeffery, W.R., 2010. Pleiotropy and eye degeneration in cavefish. *Heredity*, 105(5),  
455 pp.495-496.

456

457 Kahn, S., Ehrlich, P., Feldman, M., Sapolsky, R. and Wong, S., 2020. The jaw epidemic:  
458 Recognition, origins, cures, and prevention. *BioScience*, 70(9), pp.759-771.

459

460 Kobayashi, T., Lyons, K.M., McMahon, A.P. and Kronenberg, H.M., 2005. BMP  
461 signaling stimulates cellular differentiation at multiple steps during cartilage  
462 development. *Proceedings of the National Academy of Sciences*, 102(50), pp.18023-  
463 18027.

464

465 Kowalko, J.E., Rohner, N., Linden, T.A., Rompani, S.B., Warren, W.C., Borowsky, R.,  
466 Tabin, C.J., Jeffery, W.R. and Yoshizawa, M., 2013. Convergence in feeding posture  
467 occurs through different genetic loci in independently evolved cave populations of  
468 *Astyanax mexicanus*. *Proceedings of the National Academy of Sciences*, 110(42),  
469 pp.16933-16938.

470

471 Kowalko, J., 2020. Utilizing the blind cavefish *Astyanax mexicanus* to understand the  
472 genetic basis of behavioral evolution. *Journal of Experimental Biology*, 223(Suppl\_1),  
473 p.jeb208835.

474

475 Krzywinski, M. et al. Circos: an Information Aesthetic for Comparative Genomics.  
476 *Genome Res* (2009) 19:1639-1645.

477

478 Long, J.A., 2016. The first jaws. *Science*, 354(6310), pp.280-281.

479

480 Ma, L., Strickler, A.G., Parkhurst, A., Yoshizawa, M., Shi, J. and Jeffery, W.R., 2018.  
481 Maternal genetic effects in *Astyanax* cavefish development. *Developmental biology*,  
482 441(2), pp.209-220.

483

484 Ma, L., Zhao, Y. and Yang, J.X., 2019. Cavefish of China. In *Encyclopedia of caves* (pp.  
485 237-254). Academic Press.

486

487 McGaugh, S.E., Gross, J.B., Aken, B., Blin, M., Borowsky, R., Chalopin, D., Hinaux, H.,  
488 Jeffery, W.R., Keene, A., Ma, L. and Minx, P., 2014. The cavefish genome reveals  
489 candidate genes for eye loss. *Nature communications*, 5(1), pp.1-10.

490

491 Moran, R.L., Jaggard, J.B., Roback, E.Y., Kenzior, A., Rohner, N., Kowalko, J.E.,  
492 Ornelas-García, C.P., McGaugh, S.E. and Keene, A.C., 2022. Hybridization underlies  
493 localized trait evolution in cavefish. *Isience*, 25(2), p.103778.

494

495 Powder, K.E. and Albertson, R.C., 2016. Cichlid fishes as a model to understand normal  
496 and clinical craniofacial variation. *Developmental biology*, 415(2), pp.338-346.

497

498 Protas, M., Conrad, M., Gross, J.B., Tabin, C. and Borowsky, R., 2007. Regressive  
499 evolution in the Mexican cave tetra, *Astyanax mexicanus*. *Current biology*, 17(5),  
500 pp.452-454.

501

502 Riddle, M.R., Aspiras, A.C., Gaudenz, K., Peuß, R., Sung, J.Y., Martineau, B., Peavey,  
503 M., Box, A.C., Tabin, J.A., McGaugh, S. and Borowsky, R., 2018. Insulin resistance in  
504 cavefish as an adaptation to a nutrient-limited environment. *Nature*, 555(7698), pp.647-  
505 651.

506

507 Riddle, M.R., Aspiras, A.C., Damen, F., Hutchinson, J.N., Chinnapen, D.J.F., Tabin, J.  
508 and Tabin, C.J., 2020. Genetic architecture underlying changes in carotenoid  
509 accumulation during the evolution of the blind Mexican cavefish, *Astyanax*  
510 *mexicanus*. *Journal of Experimental Zoology Part B: Molecular and Developmental*  
511 *Evolution*, 334(7-8), pp.405-422.

512

513 Romer, A.S., 1941. Vertebrate paleontology.

514

515 Romero Jr, A., 2009. Ozark Cavefish aka *Amblyopsis rosae*.

516

517 Riddle, M.R., Aspiras, A., Damen, F., McGaugh, S., Tabin, J.A. and Tabin, C.J., 2021.  
518 Genetic mapping of metabolic traits in the blind Mexican cavefish reveals sex-  
519 dependent quantitative trait loci associated with cave adaptation. *BMC ecology and*  
520 *evolution*, 21(1), pp.1-22.

521

522 Sumi, K., Asaoka, R., Nakae, M. and Sasaki, K., 2015. Innervation of the lateral line  
523 system in the blind cavefish *Astyanax mexicanus* (Characidae) and comparisons with  
524 the eyed surface-dwelling form. *Ichthyological research*, 62(4), pp.420-430.

525

526 Varatharasan, N., Croll, R.P. and Franz-Odenaal, T., 2009. Taste bud development  
527 and patterning in sighted and blind morphs of *Astyanax mexicanus*. *Developmental*  
528 *Dynamics*, 238(12), pp.3056-3064.

529

530 Warren, W.C., Boggs, T.E., Borowsky, R., Carlson, B.M., Ferrufino, E., Gross, J.B.,  
531 Hillier, L., Hu, Z., Keene, A.C., Kenzior, A. and Kowalko, J.E., 2021. A chromosome-  
532 level genome of *Astyanax mexicanus* surface fish for comparing population-specific  
533 genetic differences contributing to trait evolution. *Nature communications*, 12(1), pp.1-  
534 12.

535

536 Wilkens, H., 2020. The role of selection in the evolution of blindness in cave  
537 fish. *Biological Journal of the Linnean Society*, 130(3), pp.421-432.

538

539 Xiong, S., Krishnan, J., Peuß, R. and Rohner, N., 2018. Early adipogenesis contributes  
540 to excess fat accumulation in cave populations of *Astyanax mexicanus*. *Developmental*  
541 *biology*, 441(2), pp.297-304.

542

543 Yamamoto, Y., Byerly, M.S., Jackman, W.R. and Jeffery, W.R., 2009. Pleiotropic  
544 functions of embryonic sonic hedgehog expression link jaw and taste bud amplification  
545 with eye loss during cavefish evolution. *Developmental biology*, 330(1), pp.200-211.

546



547 Yoshizawa, M., Jeffery, W.R., van Netten, S.M. and McHenry, M.J., 2014. The  
548 sensitivity of lateral line receptors and their role in the behavior of Mexican blind  
549 cavefish (*Astyanax mexicanus*). *Journal of Experimental Biology*, 217(6), pp.886-895.

550

551 Yuasa, T. and Iwamoto, M.E., 2006. Mechanism of cartilage matrix remodeling by  
552 Wnt. *Clinical Calcium*, 16(6), pp.1034-1039.

553

554

555

556

557

558

559

560

561

562

563

564

565

566

567

568

569

570

571

572

573

## 574 **Figure Legends**

575

### 576 **Figure 1. Fish with an underbite exhibit a larger maxillary – lower jaw angle**

577 **(gape), which negatively correlates with feeding angle.** Adult surface fish (A) have a

578 smaller maxillary – lower jaw angle (mean= 106°) compared to cavefish (D; mean=

579 136°;  $p < 0.001$ ) (B). F<sub>2</sub> hybrids scored as having an overbite were not significantly

580 different than surface fish (mean= 116.5°;  $p = 0.1$ ) (B). Additionally, F<sub>2</sub> hybrids scored as

581 having an underbite were not significantly different from cavefish (mean= 130°;  $p = 0.62$ )

582 (B). In agreement with data from Kowalko et al. 2013, we determined that surface fish

583 feed at an average of ~80-90° angle compared to cavefish that feed at ~45° (C). While

584 F<sub>2</sub> hybrids with an overbite feed at a similar angle to surface fish, F<sub>2</sub>s with an underbite

585 feed within a wide averaged range between 65-95° (C). Compared to F<sub>2</sub>s with an

586 overbite that have a maximum feeding angle of 90°, underbite F<sub>2</sub>s had a significantly

587 higher maximum feeding angle at 110° (E). There is a negative correlation ( $R = -0.4134$ )

588 between a higher maxillary – lower jaw angle and feeding posture angle (F). White

589 scale bar set at 2 mm.

590

### 591 **Figure 2. Fish with an underbite leave a greater number of tooth marks in bite**

592 **impressions compared to fish with an overbite.** Surface fish (A, E) make bite

593 impressions with fewer tooth marks (mean= 6.7) compared to cavefish (mean= 10;  
594  $p < 0.01$ ) (B, F, L). Accordingly,  $F_2$  hybrids with an overbite (C, G) left fewer tooth marks  
595 (mean= 5.6) than  $F_2$  hybrids with an underbite (mean= 8.6;  $p < 0.05$ ) (D, H, L).  $F_2$  hybrids  
596 with an underbite have significantly longer lower jaws (normalized length;  $p < 0.05$ ) (I)  
597 and an increase in lower jaw tooth number ( $p < 0.001$ ) compared to  $F_2$  hybrids with an  
598 overbite (K). There was no significant difference between upper jaw tooth number  
599 between the two hybrid groups (J). White scale bar set at 1 mm.

600

601 **Figure 3. Quantitative Trait Loci (QTL) analysis reveals a genetic basis for bite**  
602 **differences.** Representative  $F_2$  hybrid microCT images demonstrate bite differences  
603 scored as a binary trait for overbite (#163) and underbite (#220) (A). The frequency of  
604  $F_2$  individuals exhibiting an overbite was ~75%, while ~25% of pedigree was scored as  
605 having an underbite (B). A single QTL peak was recorded for the bite phenotype rising  
606 about the significance threshold (blue line  $p < 0.05$ ; red line  $p < 0.1$ ) (C). The QTL peak  
607 resides on linkage group 1 between map positions 86-95 cM (D). Genetic marker  
608 r52534 had the peak LOD score (4.708) and the effect plot indicates that the  
609 homozygous cavefish genotype is associated with an underbite, while the homozygous  
610 surface fish and heterozygous genotypes are associated with an overbite (E). Flanking  
611 genetic markers r80566 and r51027 illustrate the same phenotypic effect (E).

612

613 **Figure 4. The peak QTL region maps to both the Pachón cavefish and surface fish**  
614 **genomes.** Six genetic markers on linkage group 1 (86-95 cM) were anchored to four  
615 Pachón cavefish genome (AstMex102) scaffolds (KB871706, KB871620, KB871713,

616 and KB871833). These four scaffolds map to an 8Mb region on *Astyanax* chromosome  
617 7 (Table S3). Within this 8Mb region on Chr. 7 resides 82 annotated genes. There of the  
618 genetic markers map to the same scaffold (KB871620) and to a ~1Mb region on Chr. 7,  
619 wherein 24 annotated genes reside.

620

621 **Supplemental Figure 1. Ethograms illustrate feeding posture differences between**  
622 **surface, cavefish and hybrids.** Consistent with findings from Kowalko et al. 2013, we  
623 determined that surface fish have a near perpendicular feeding posture with an average  
624 angle between 80°-90° (A) and cavefish feed at a lower angle of 40°-60° (B). Surface x  
625 Pachón F<sub>2</sub> hybrids demonstrated three feeding posture categories: surface-like F<sub>2</sub>  
626 hybrids with an average feeding angle between 80°-90° (C), a mix of surface- and cave-  
627 like feeding postures with angles ranging from 40°-90° (D), and an extreme obtuse  
628 posture with angles up to 110° (E).

629



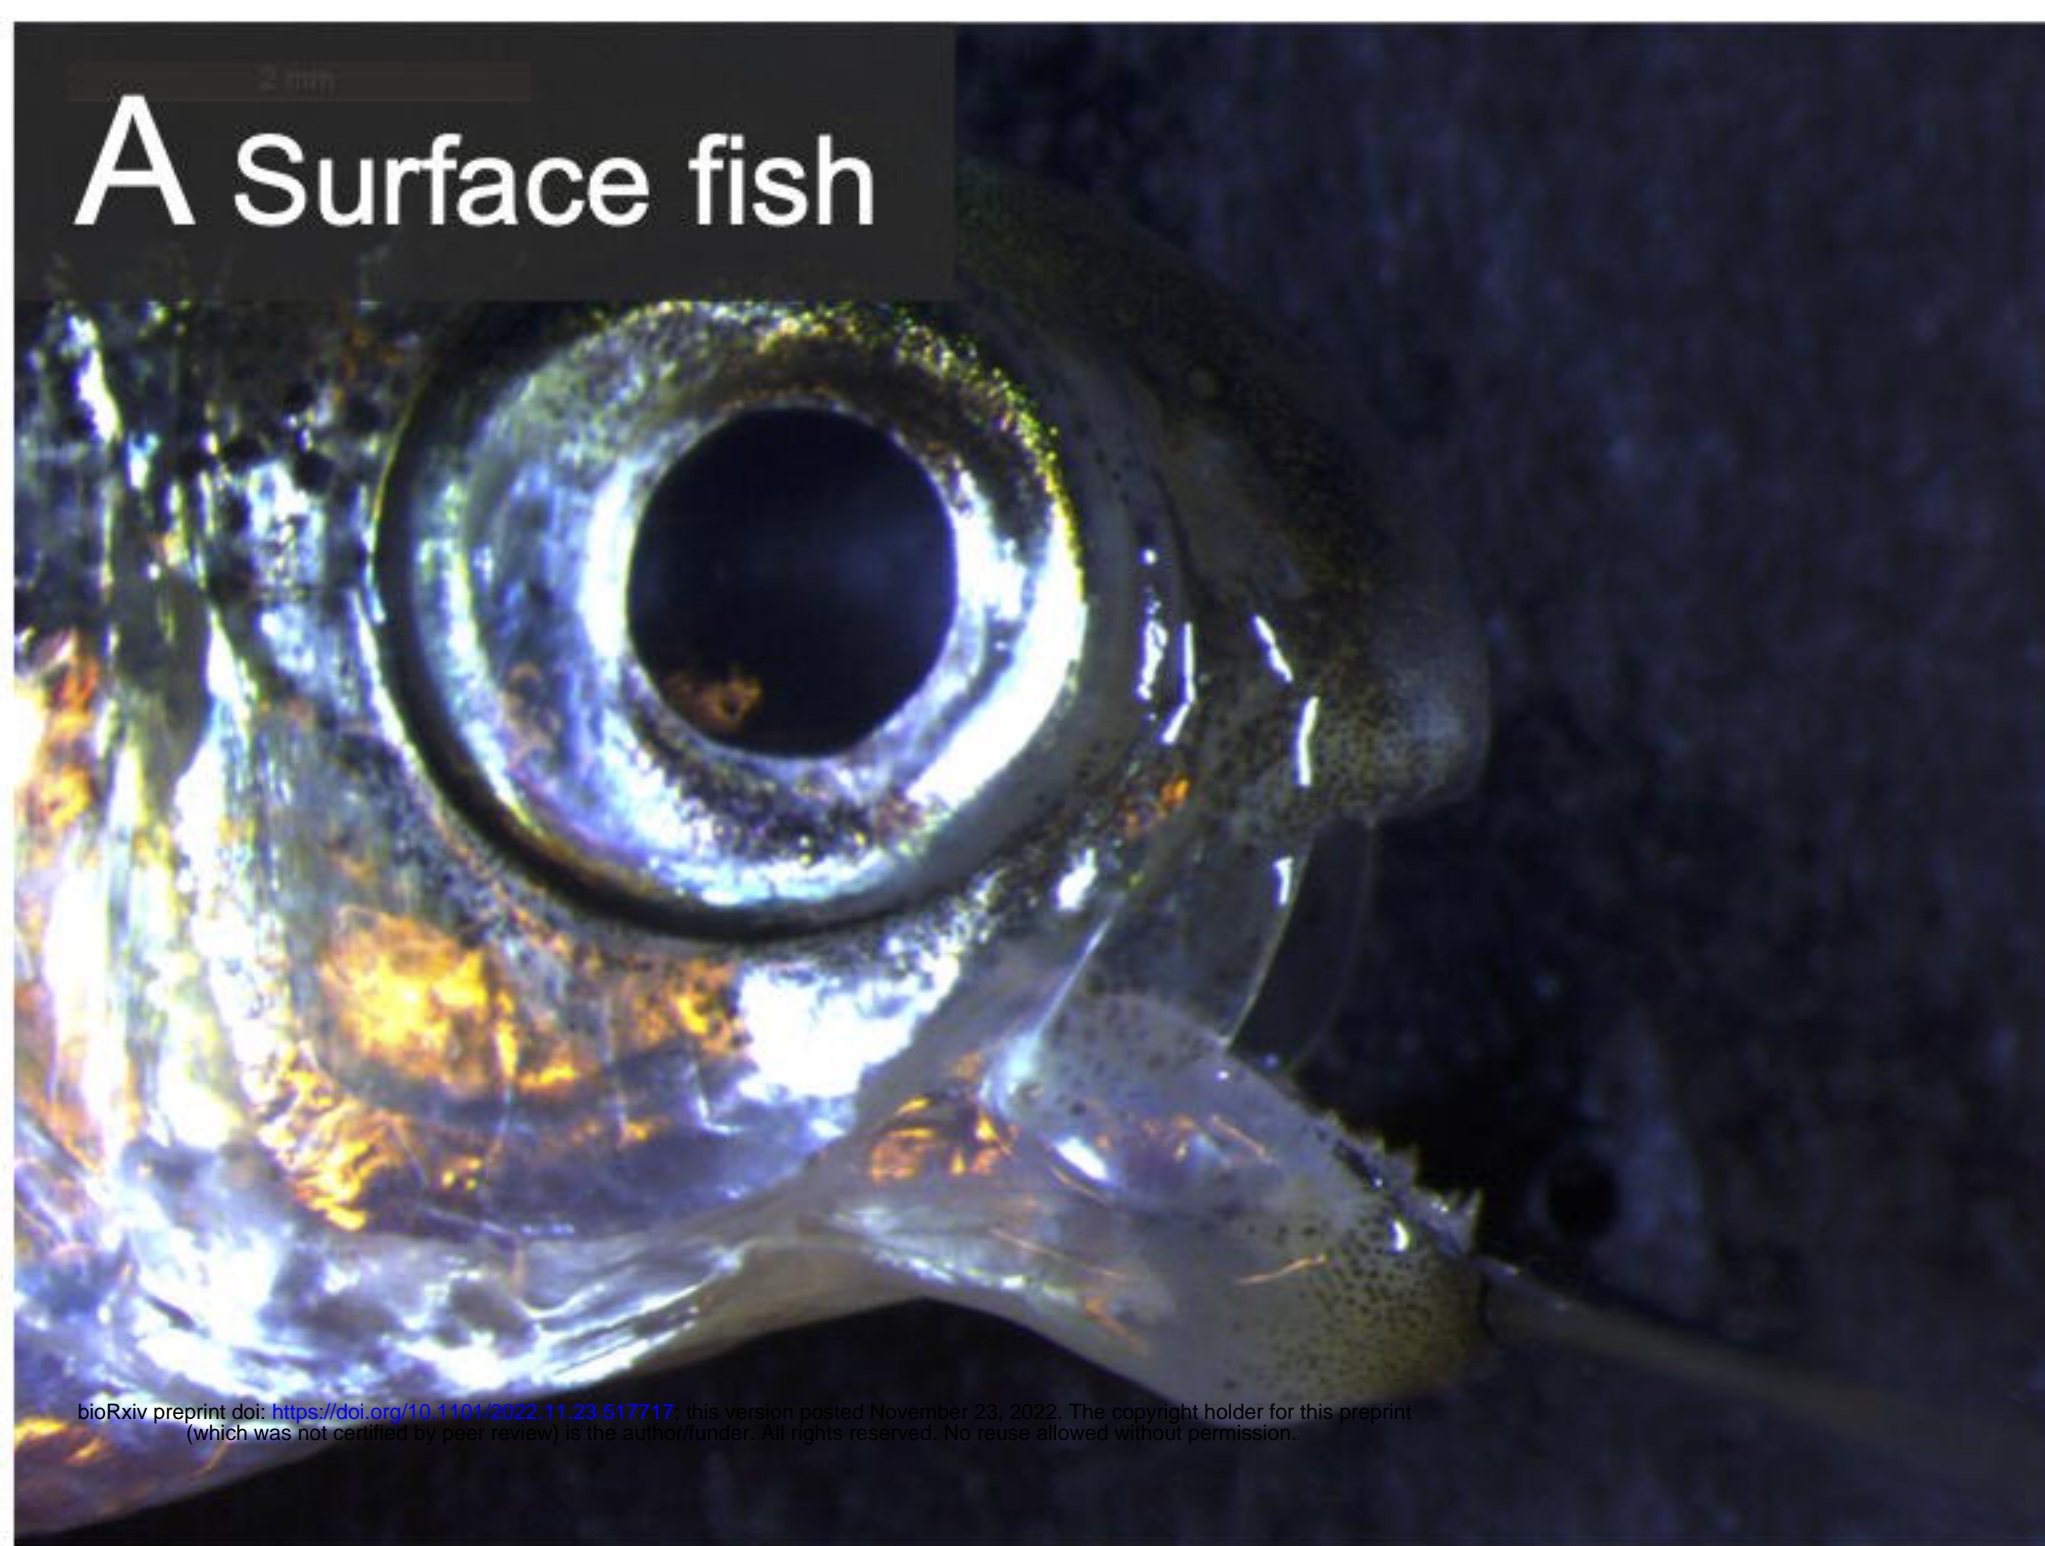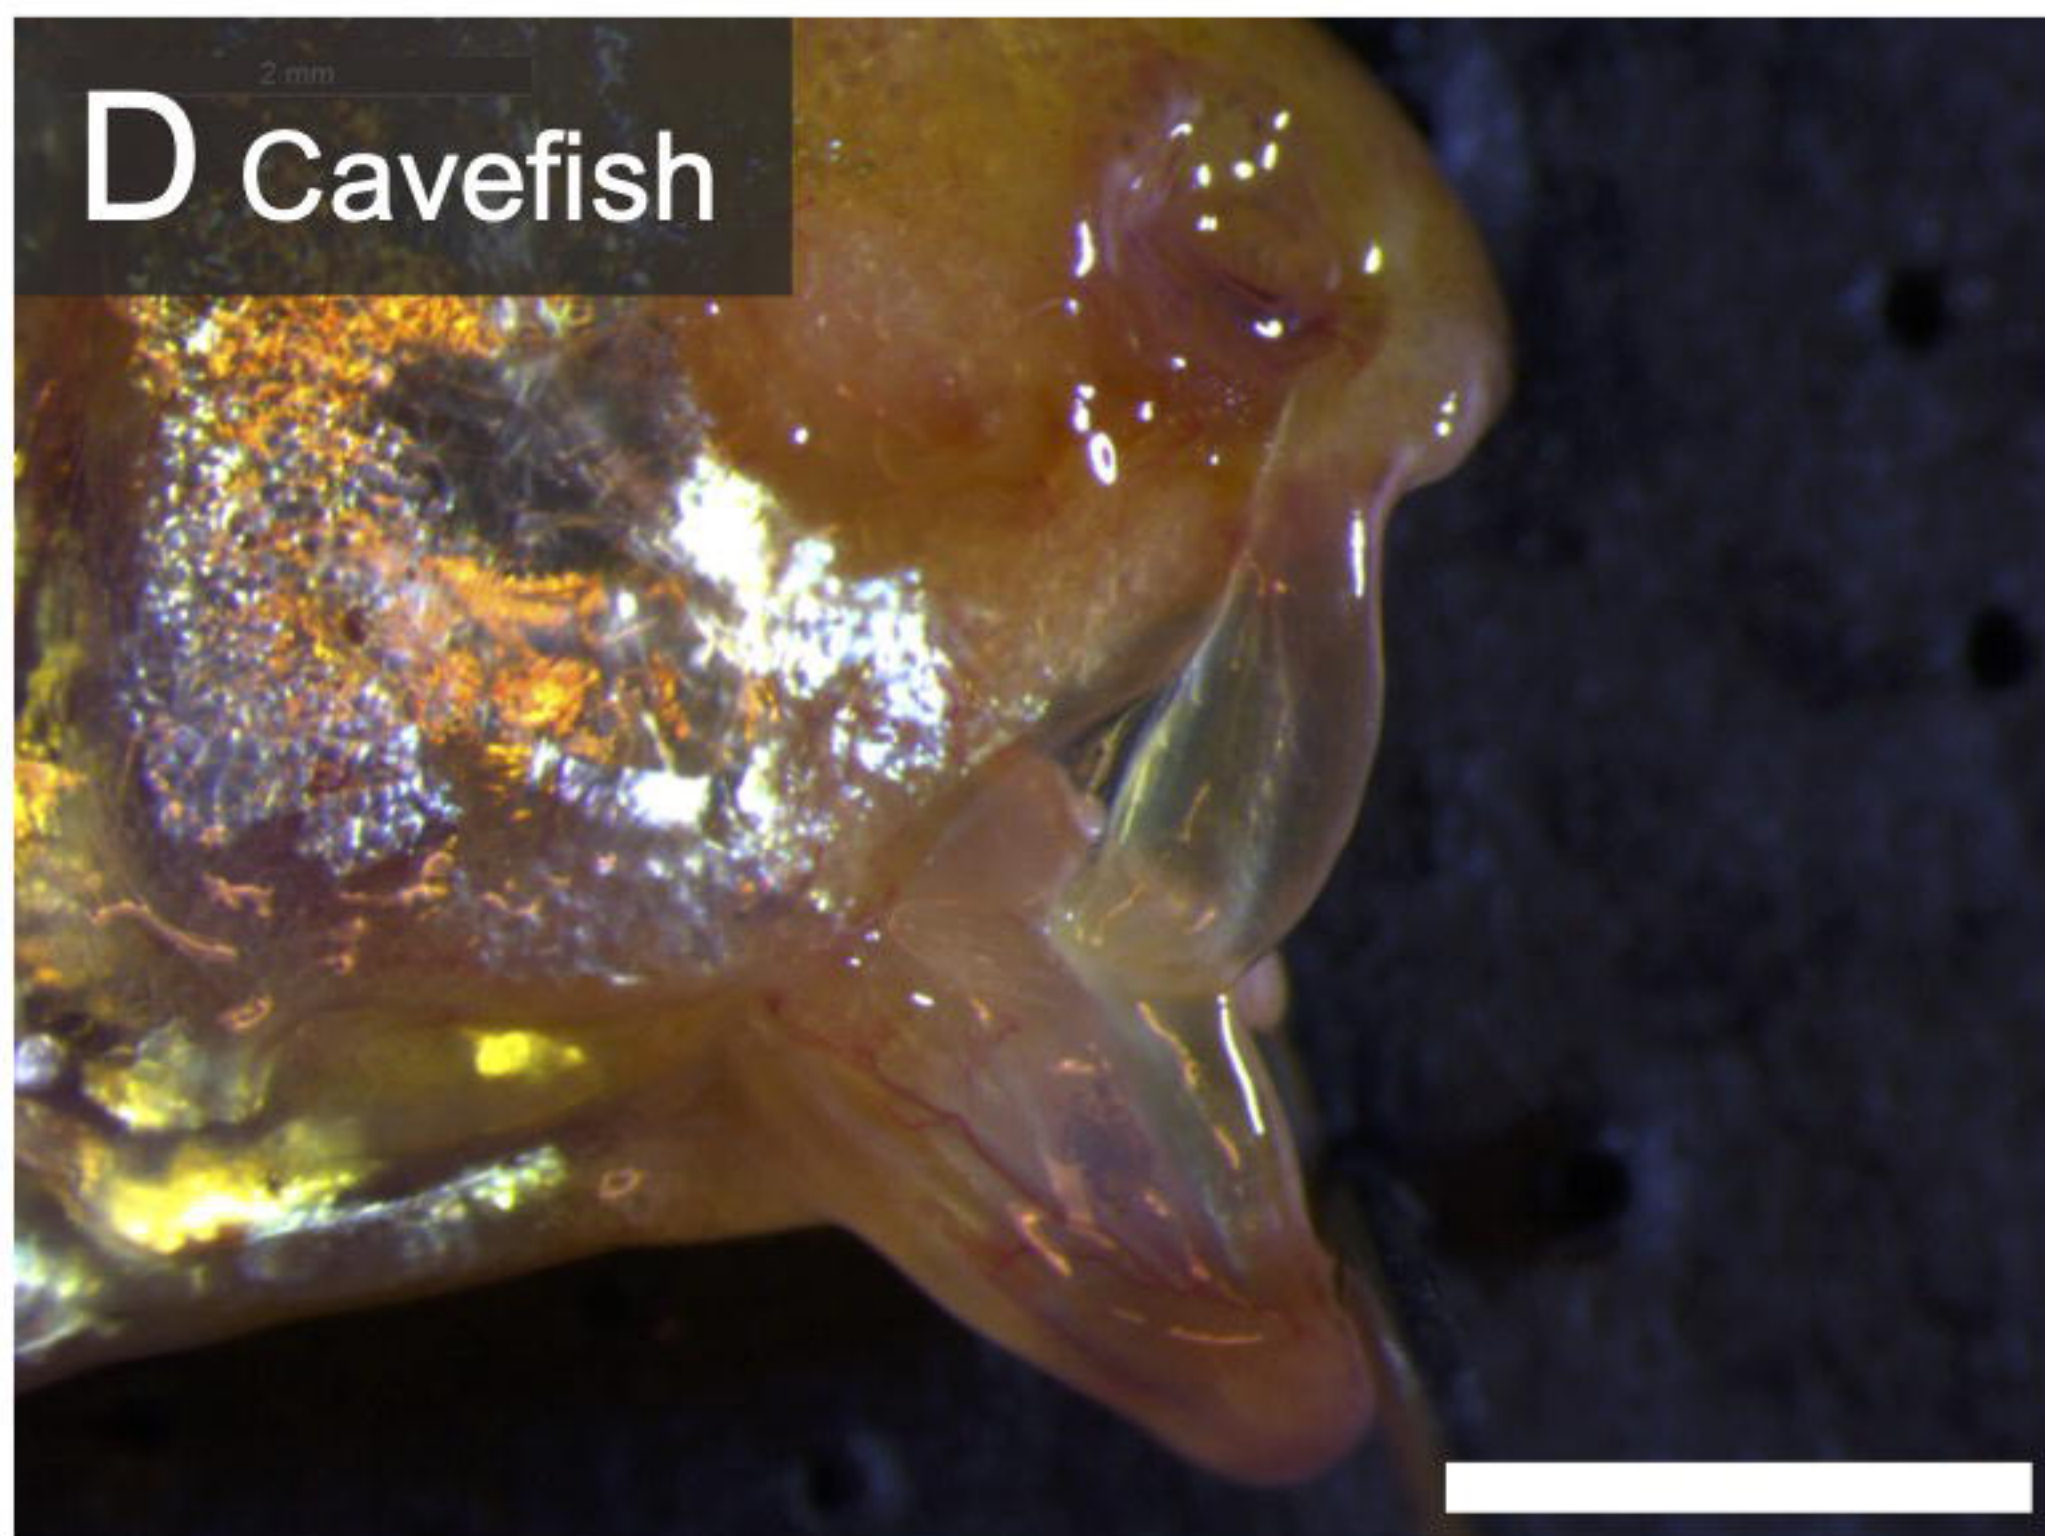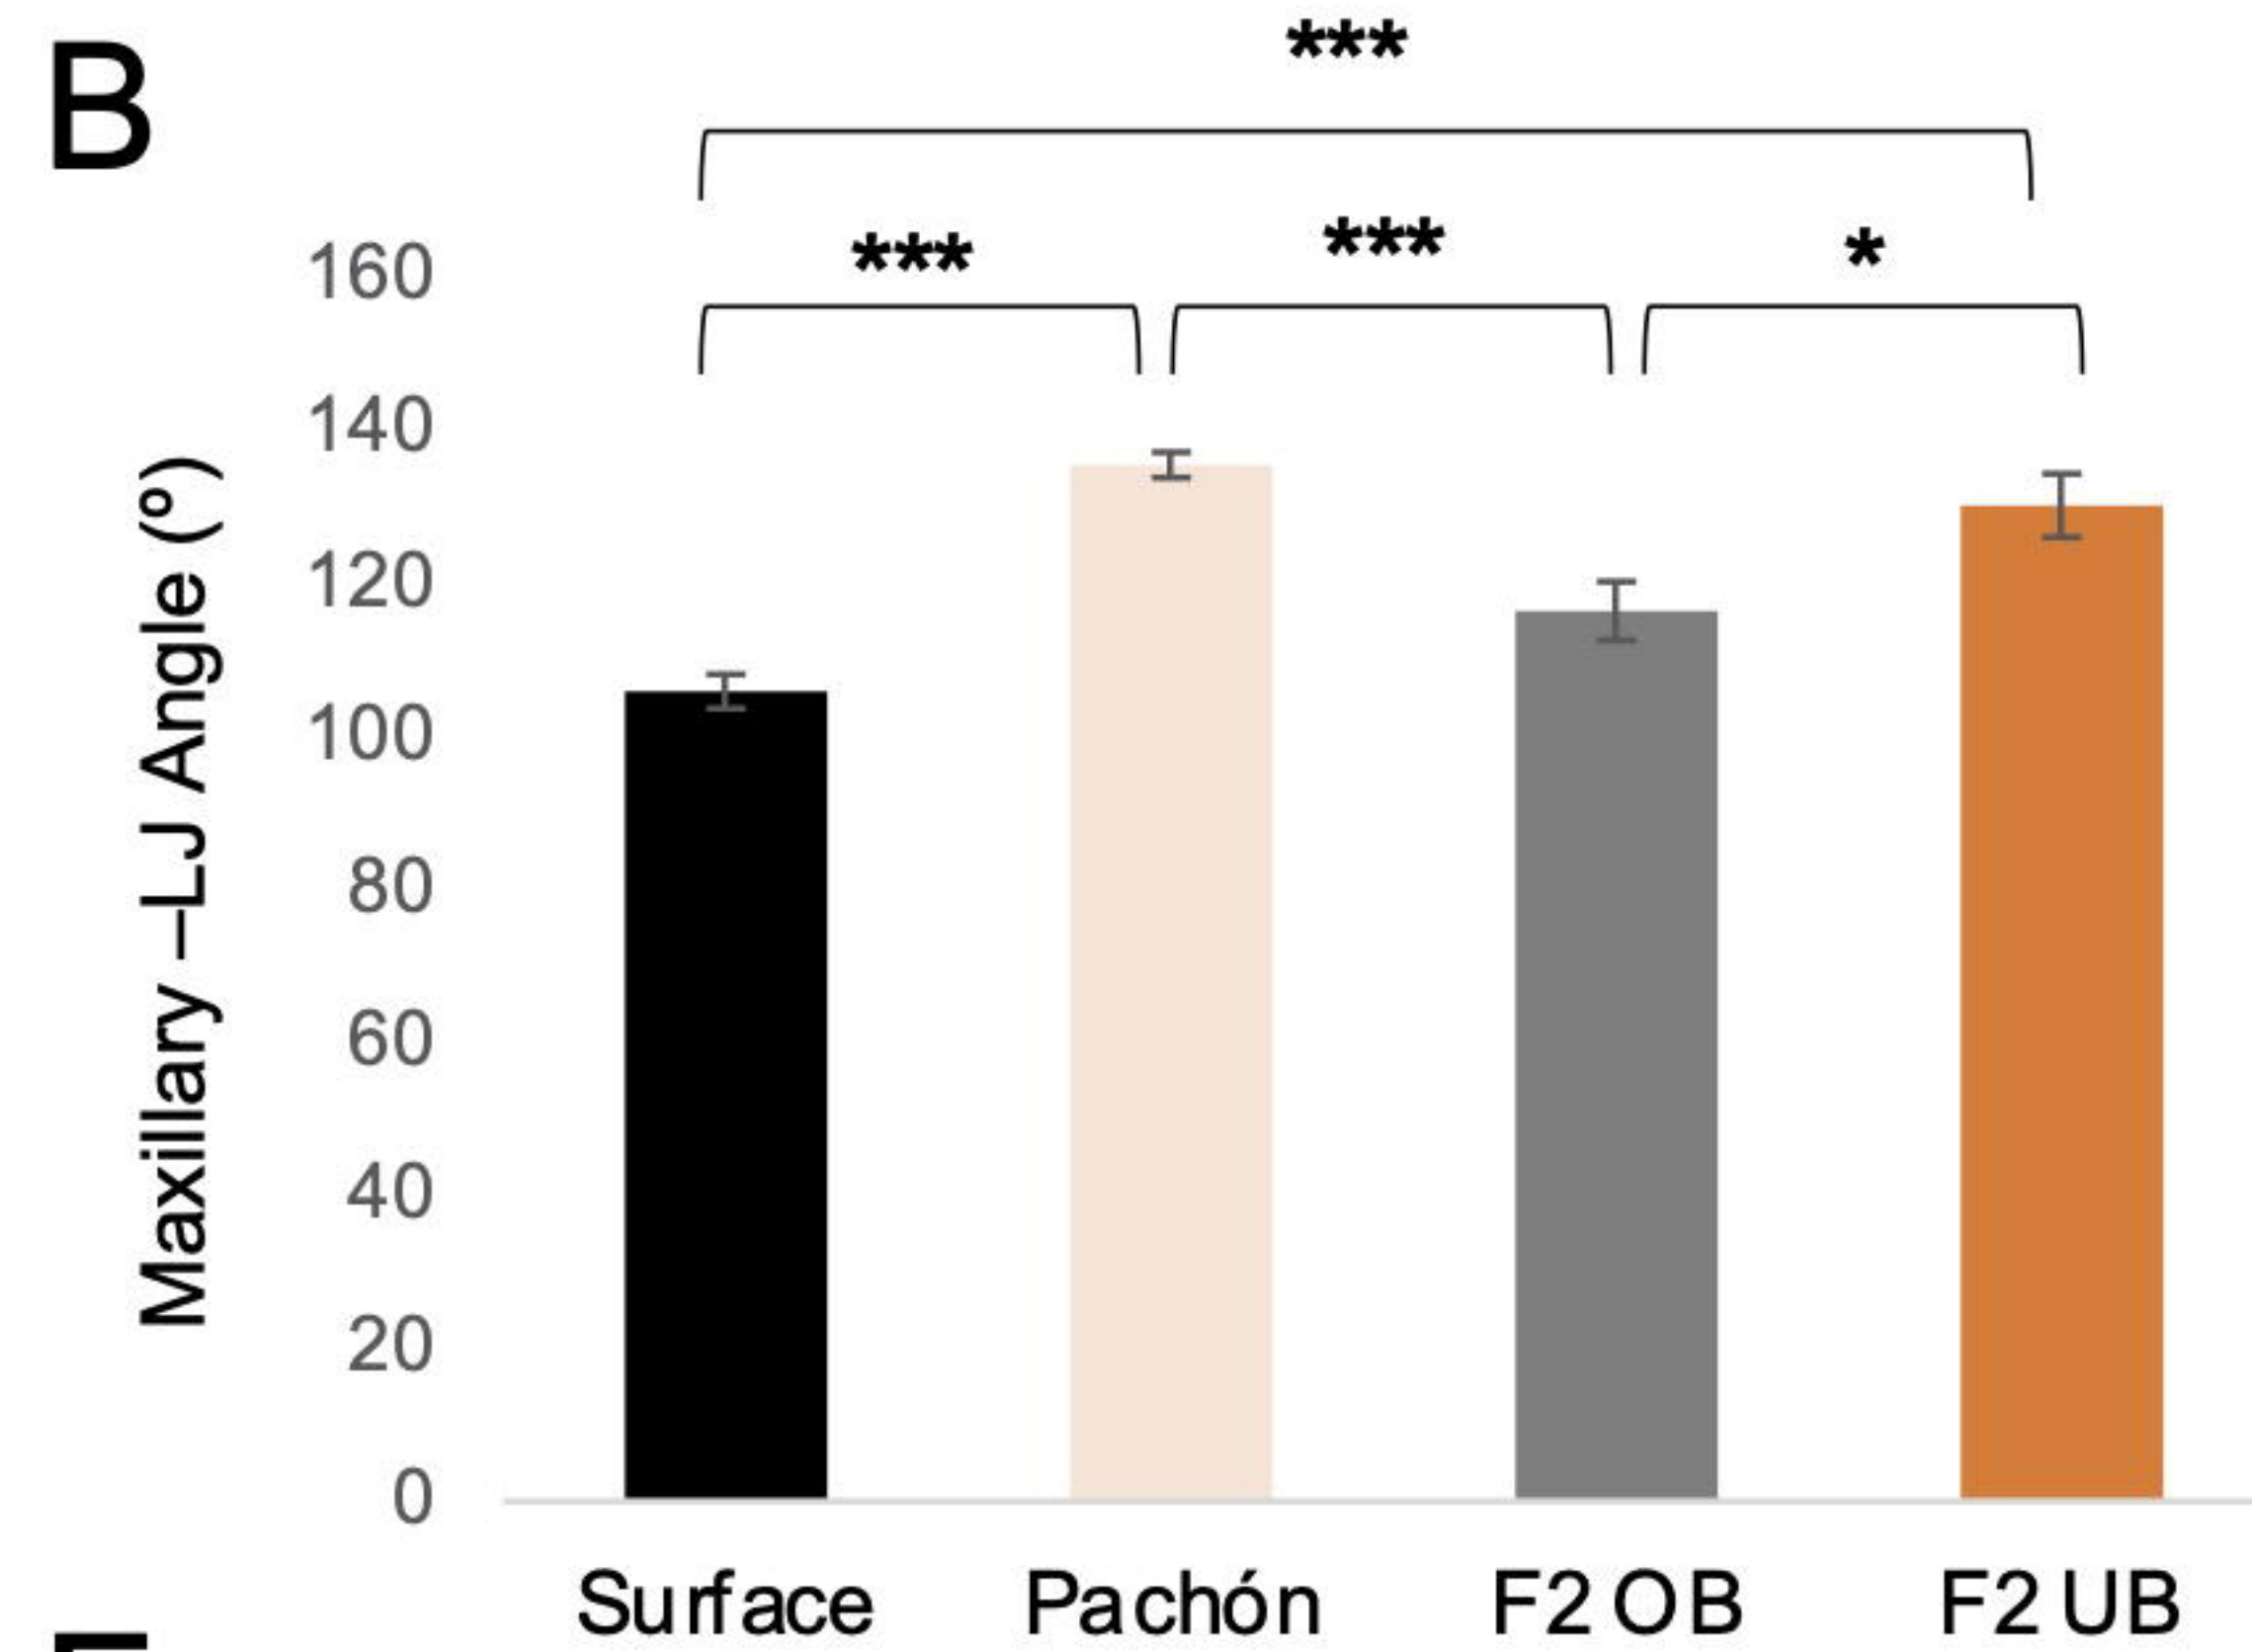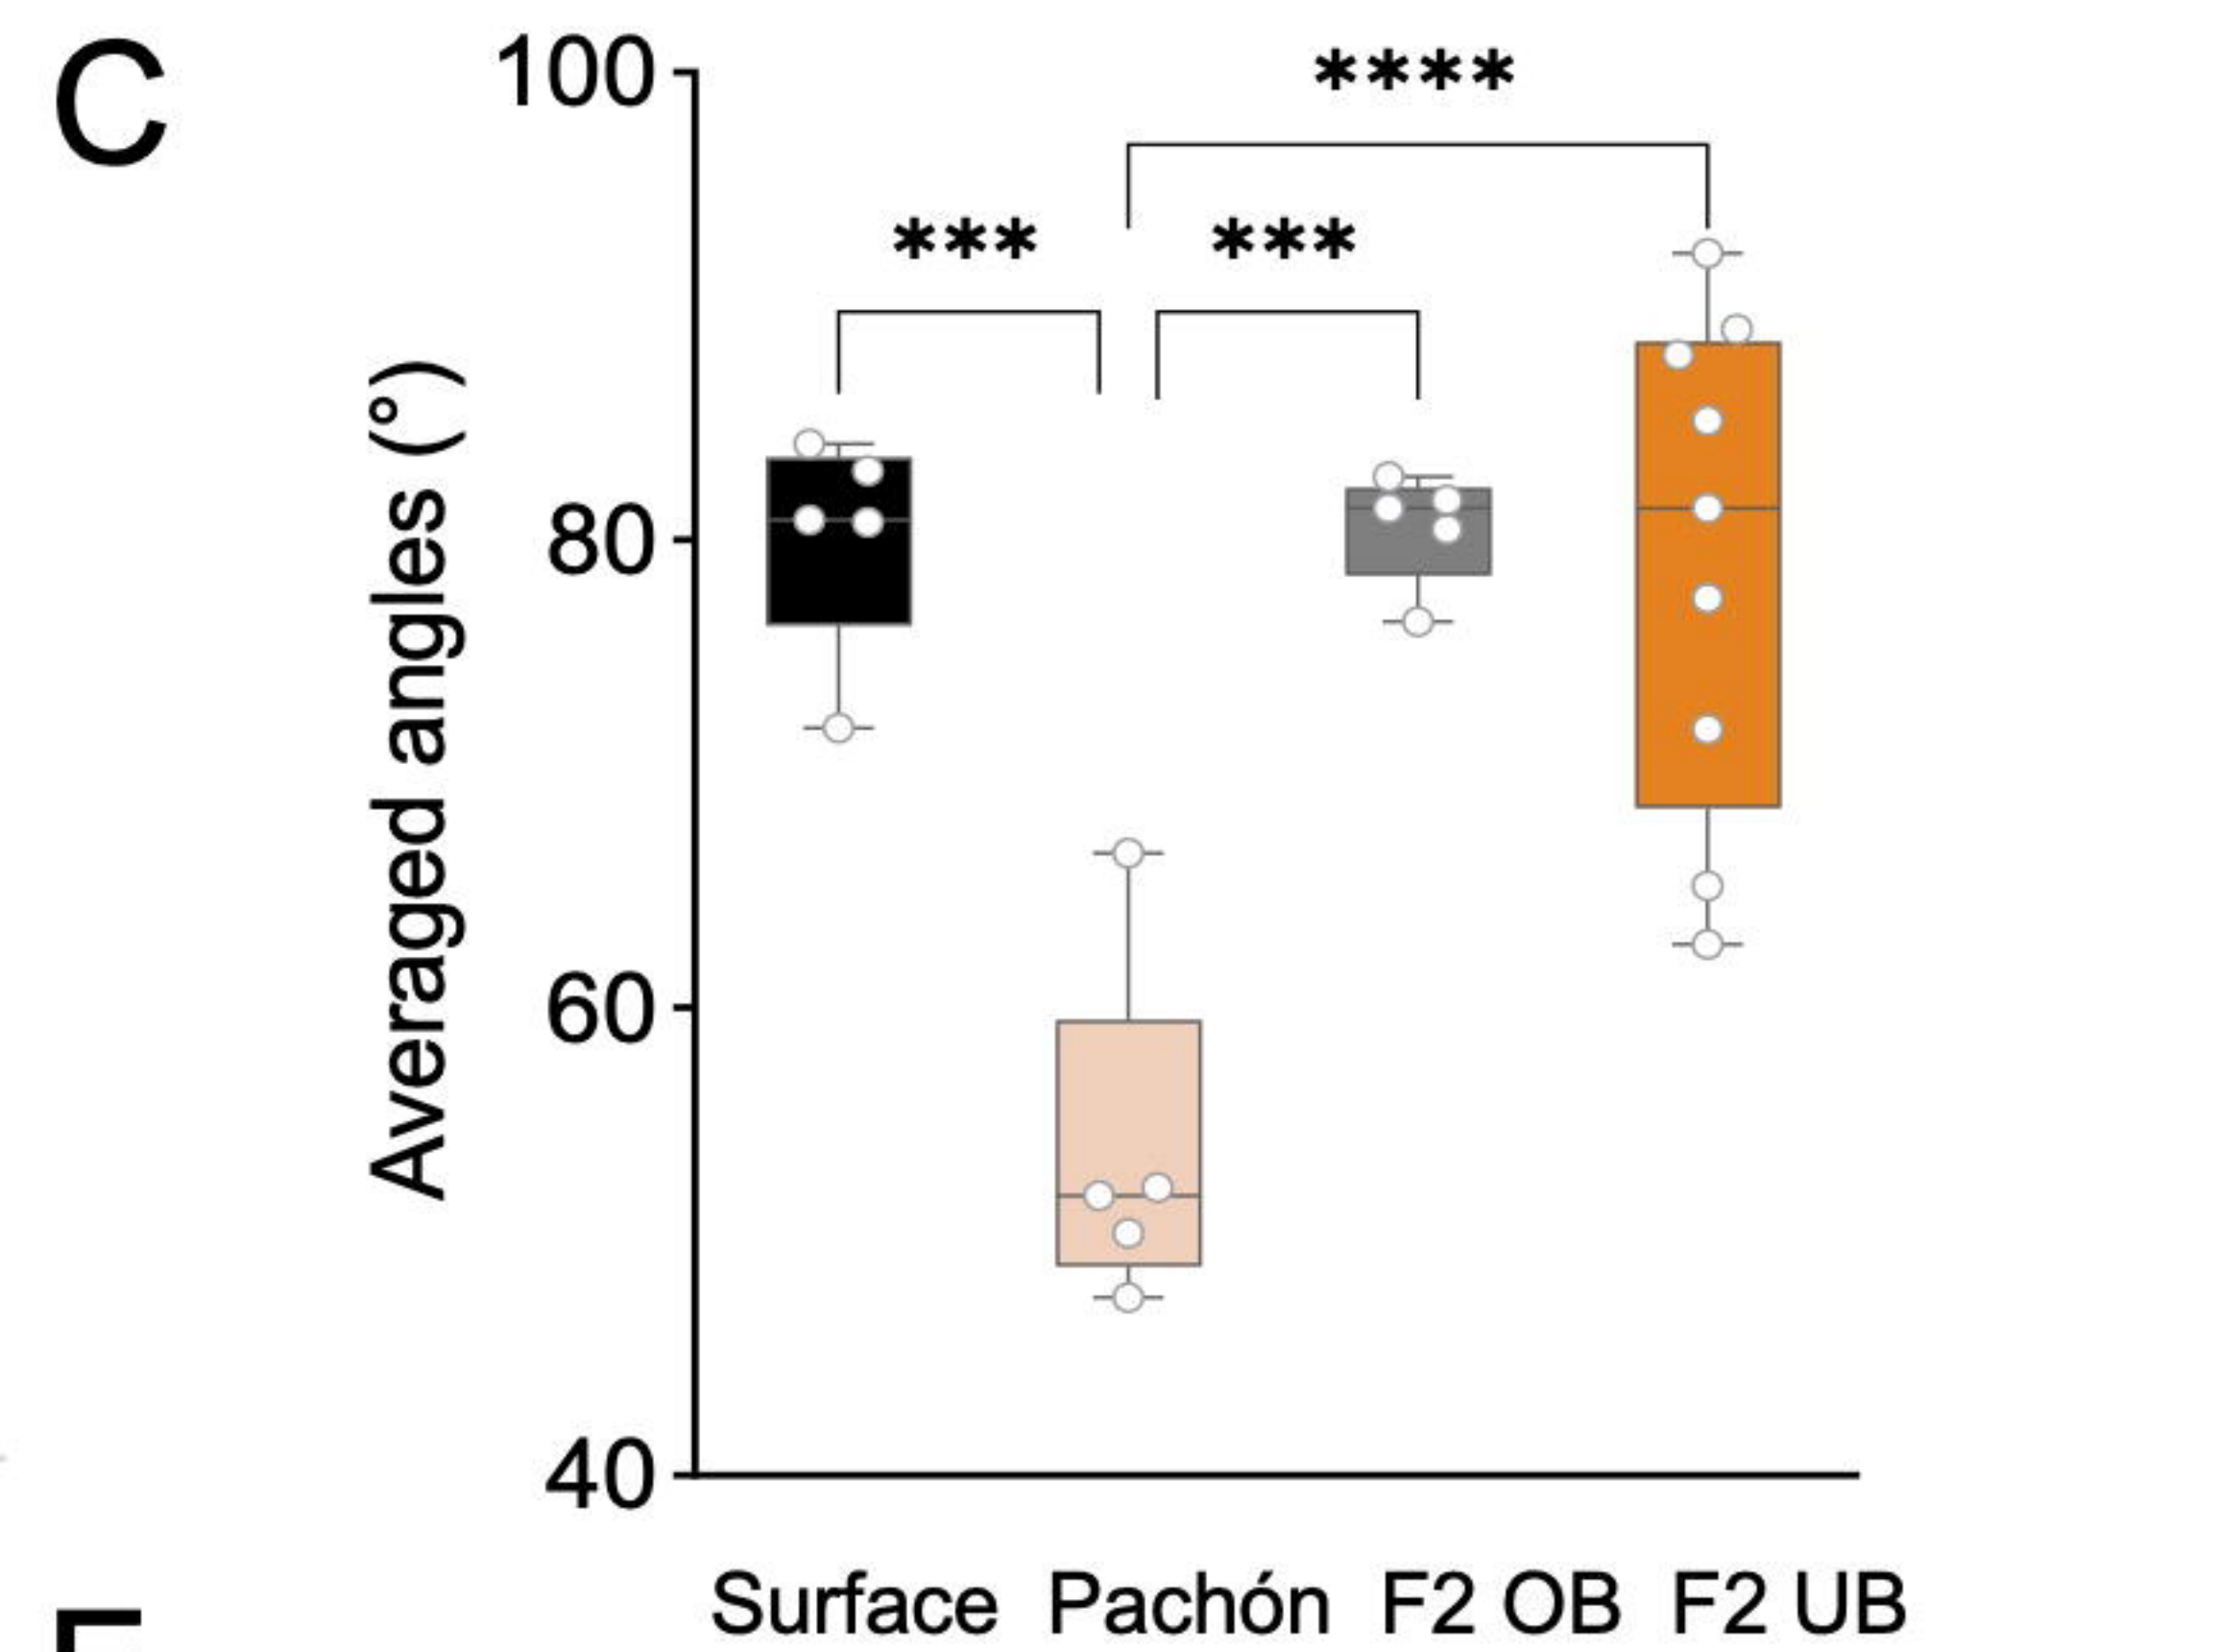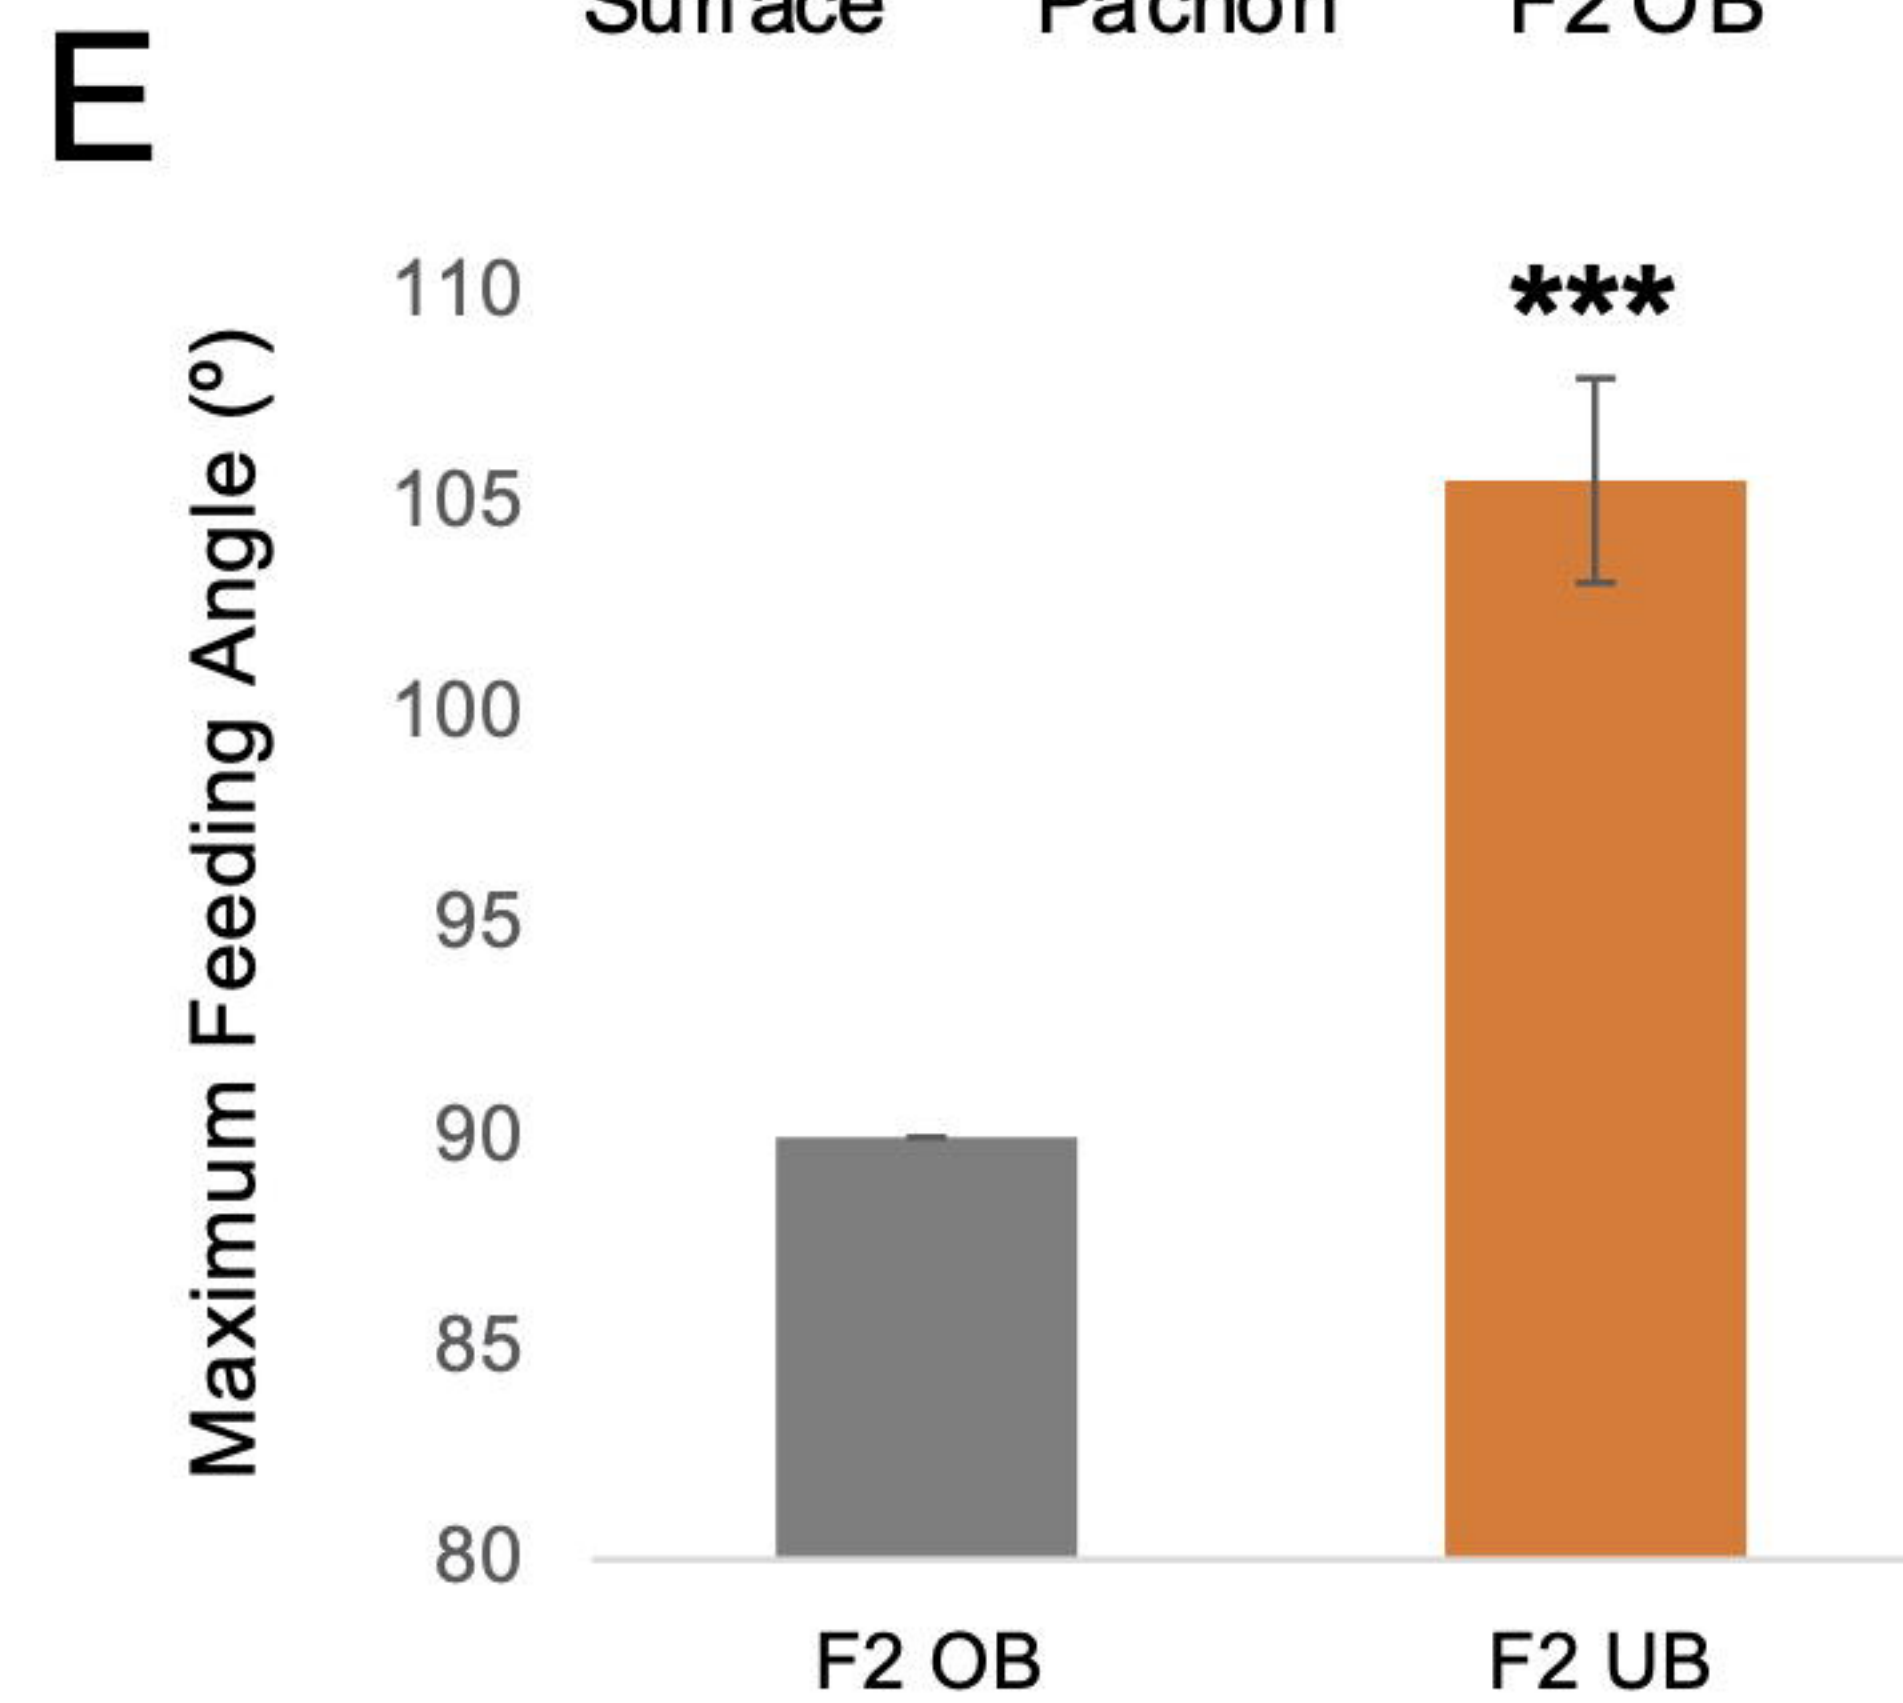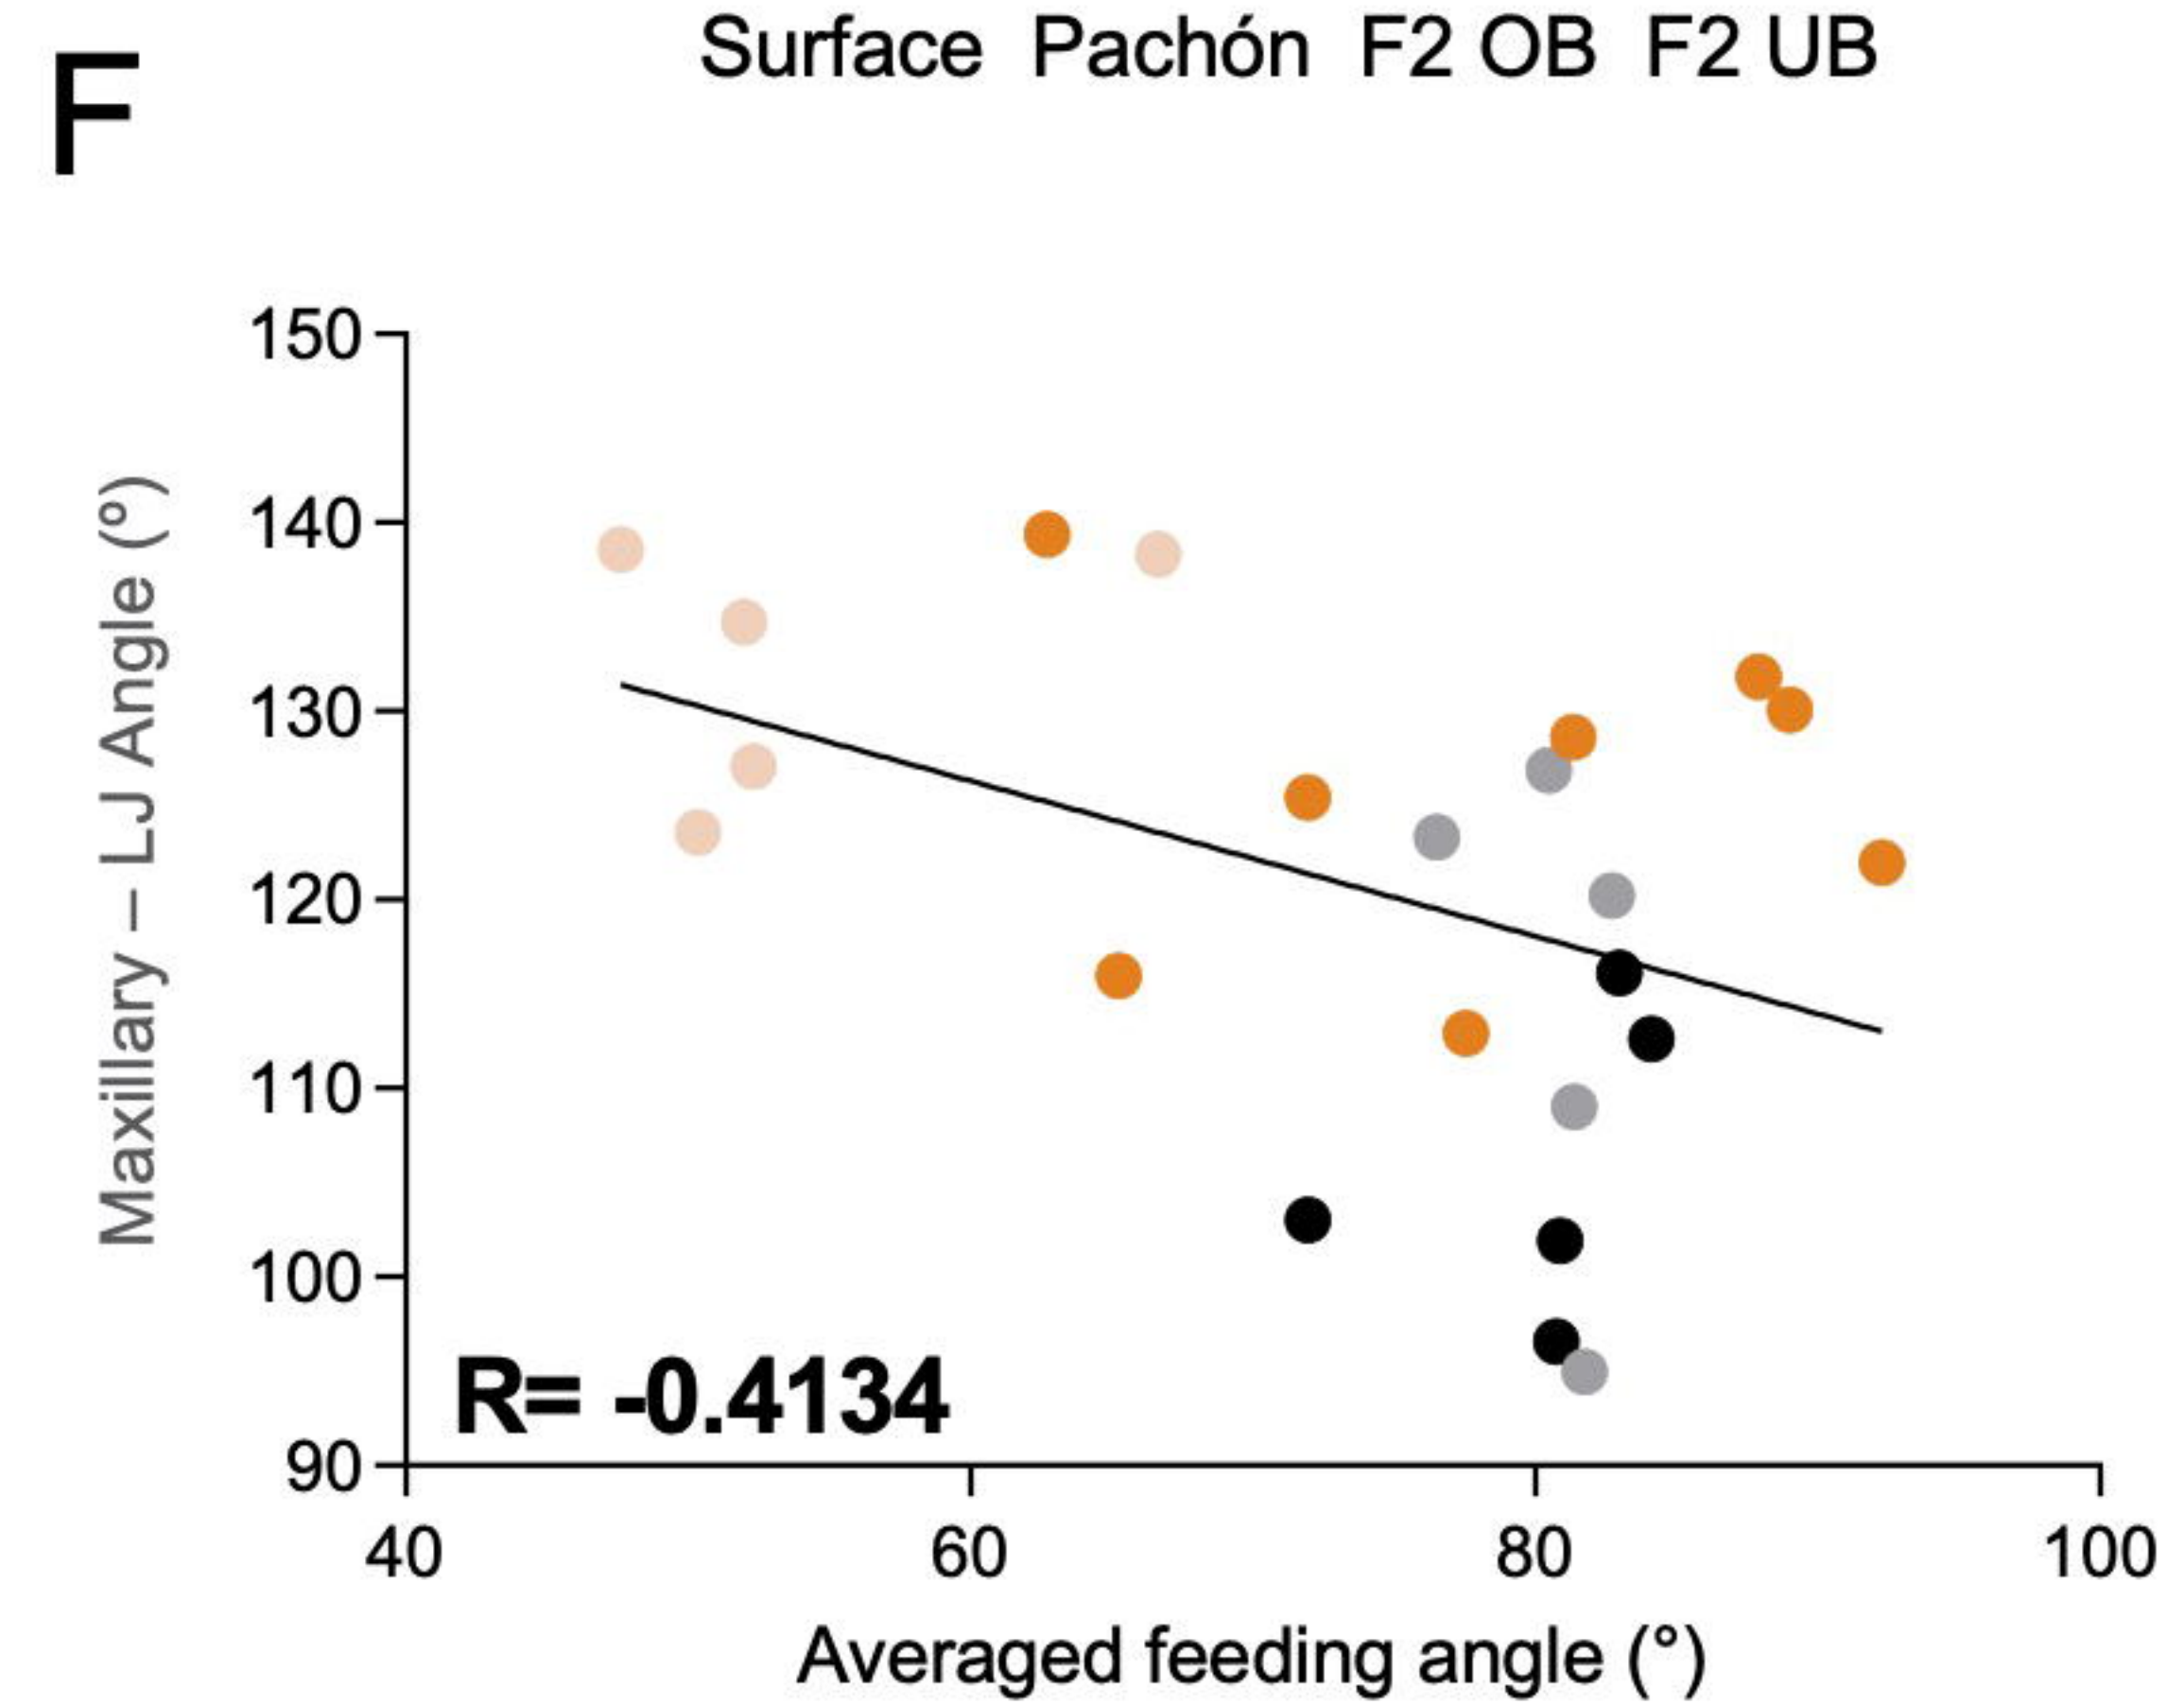



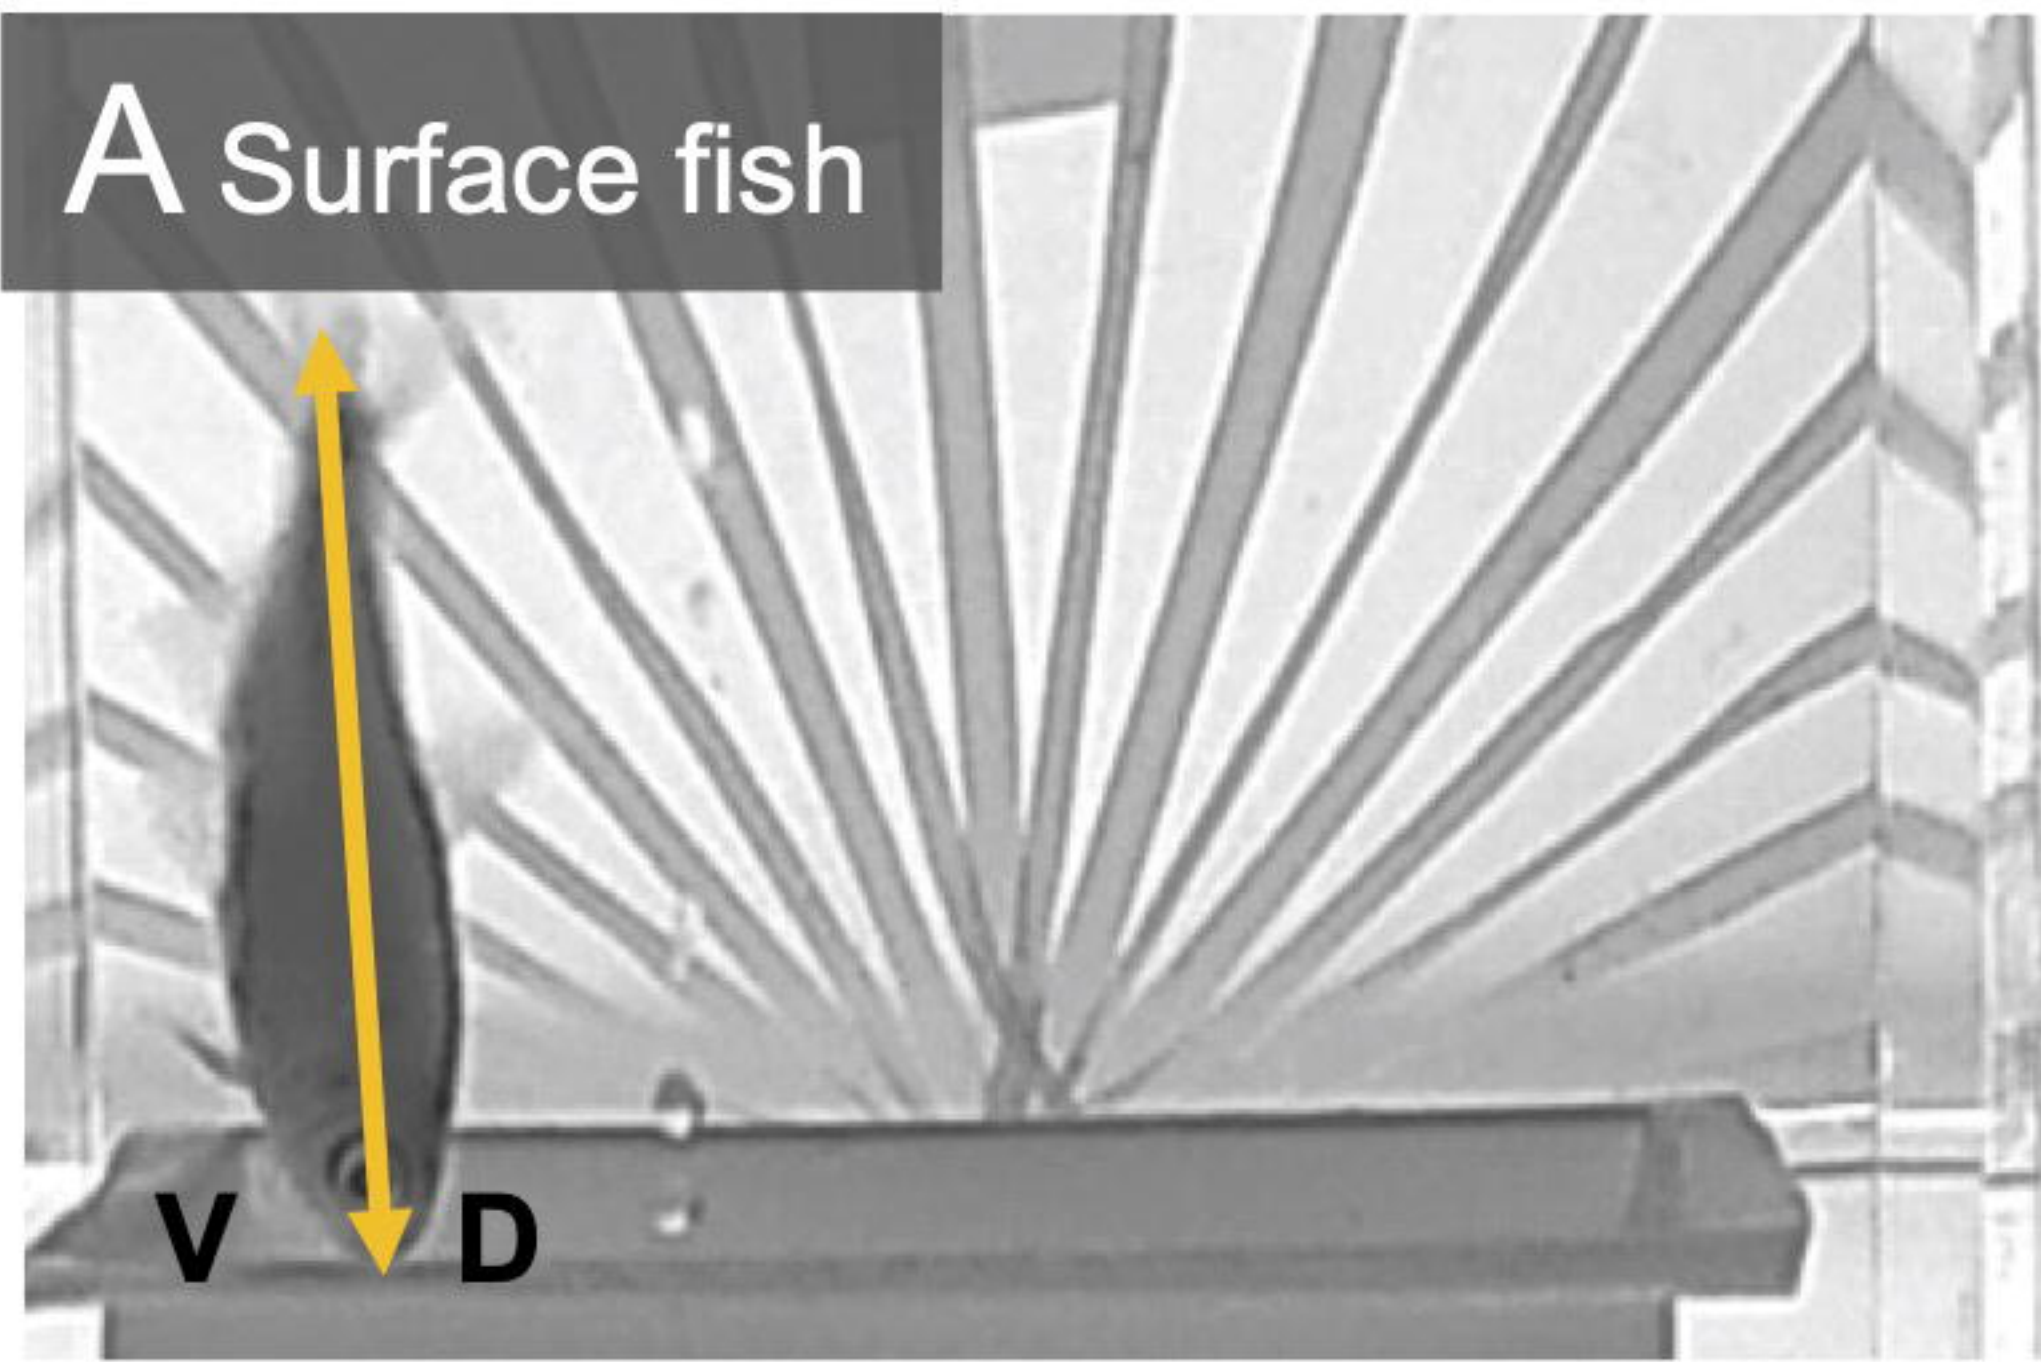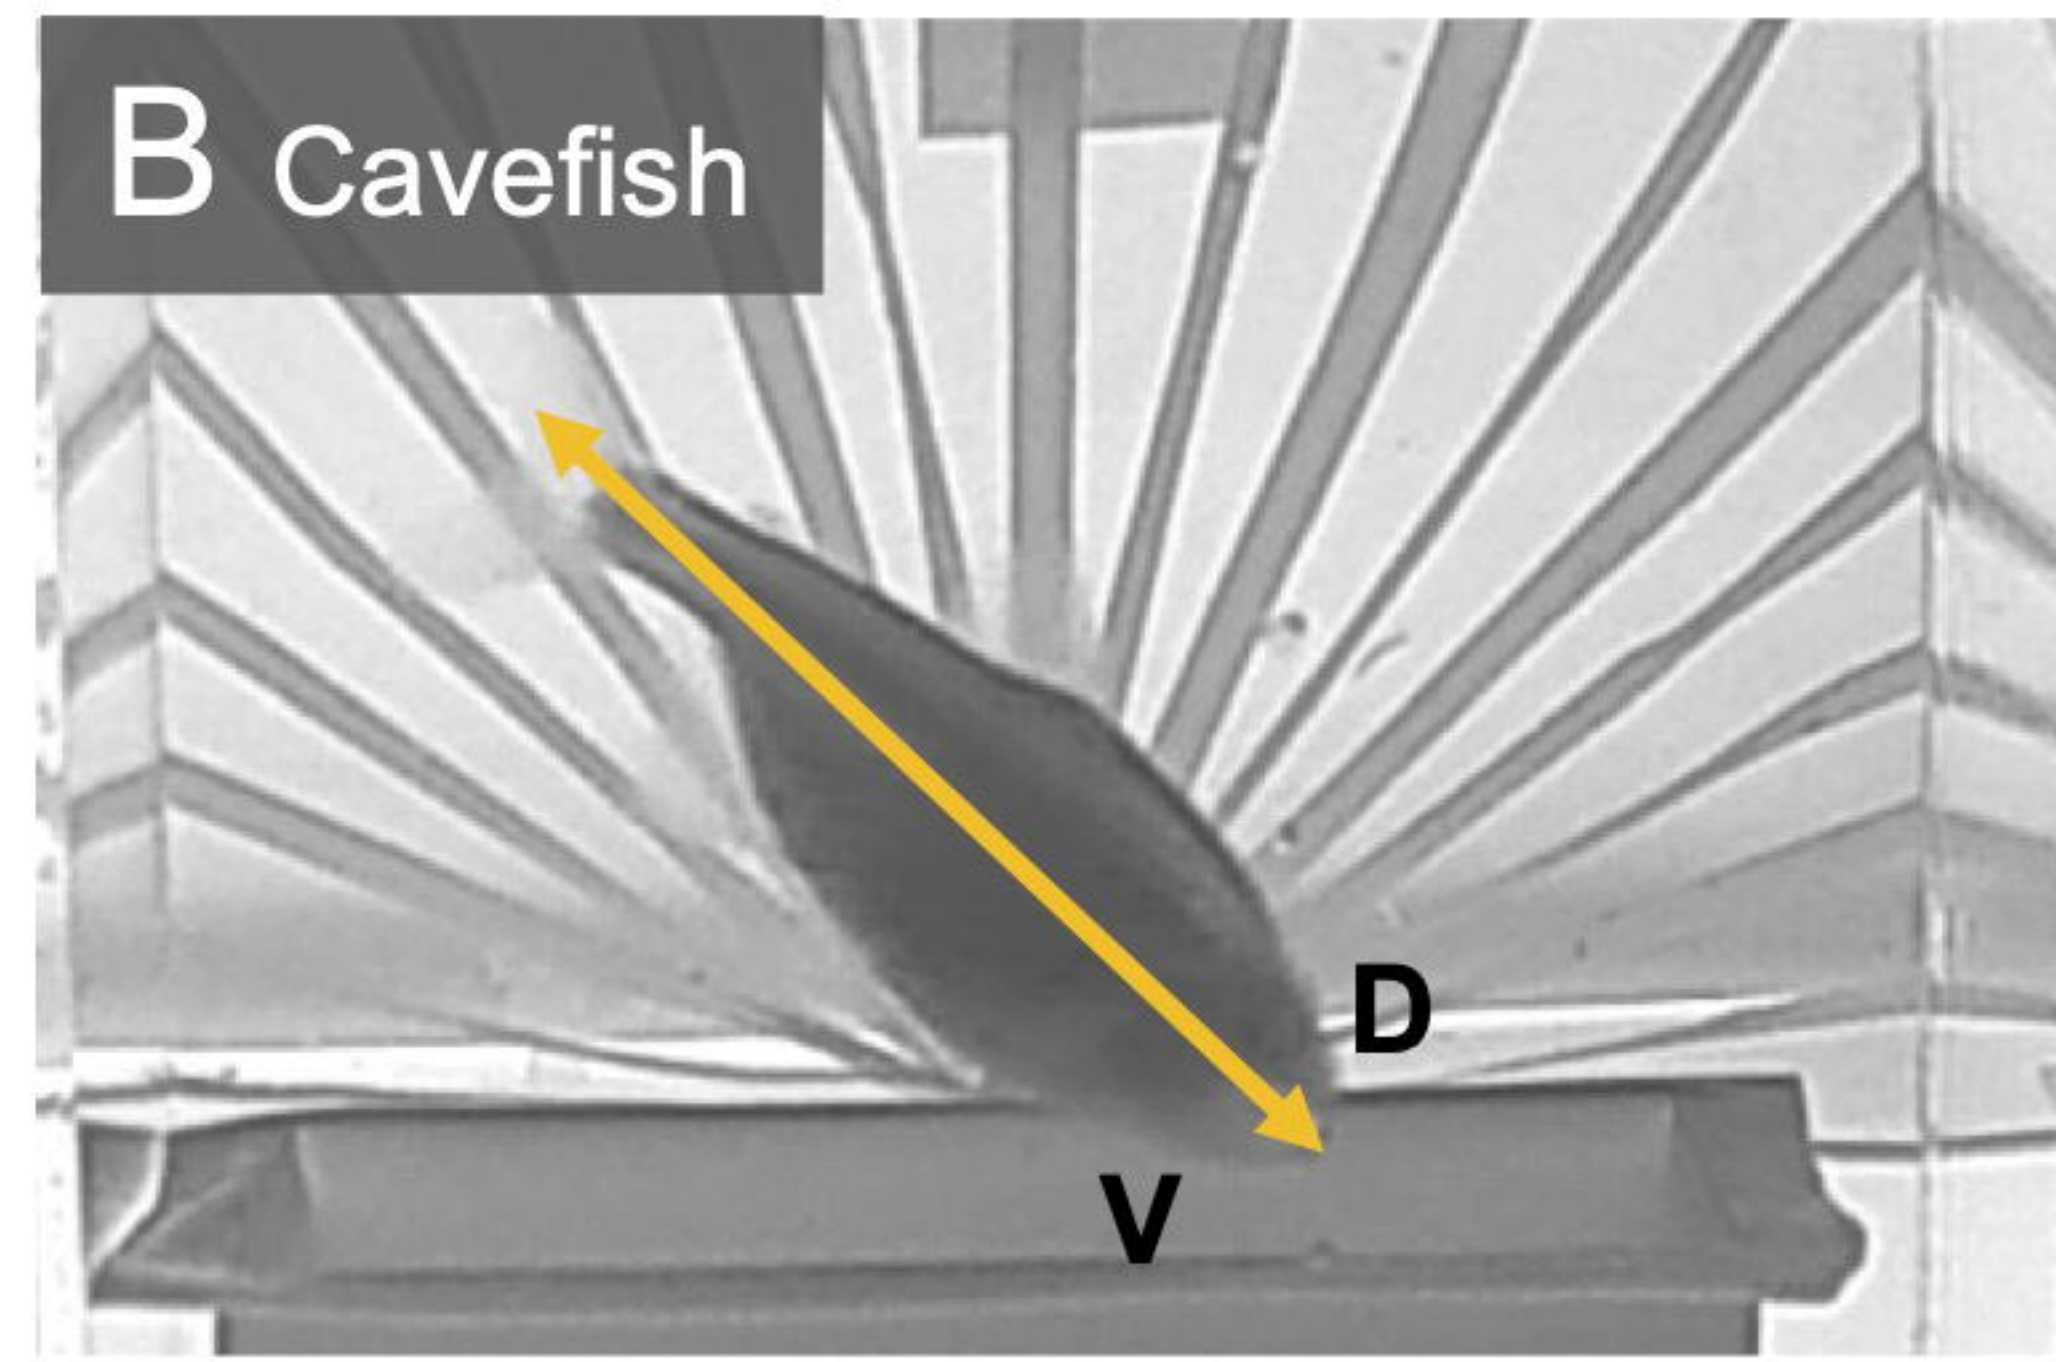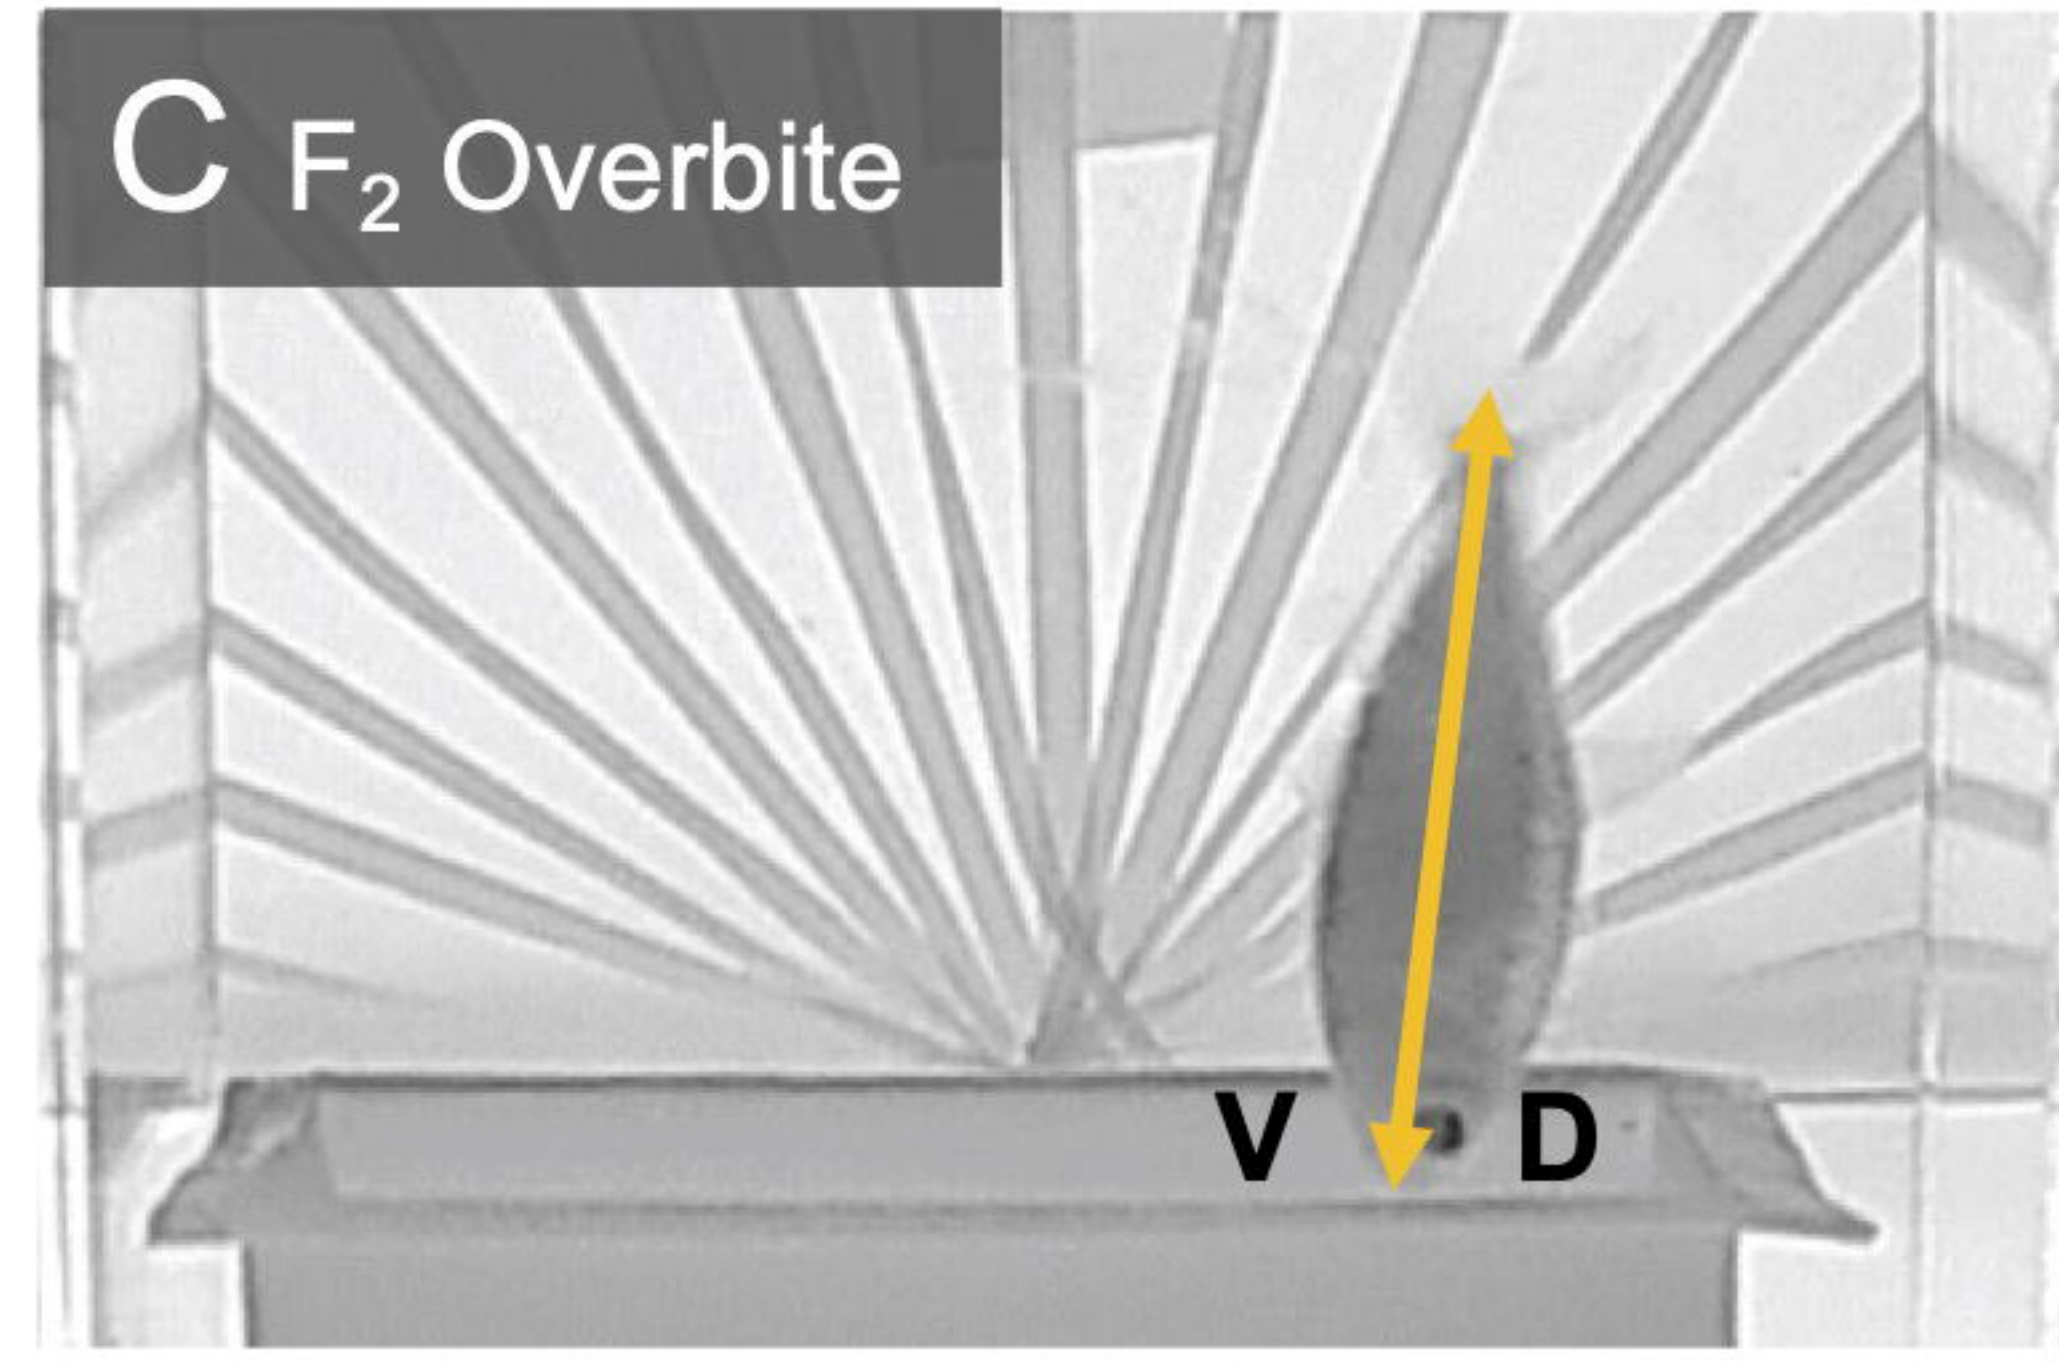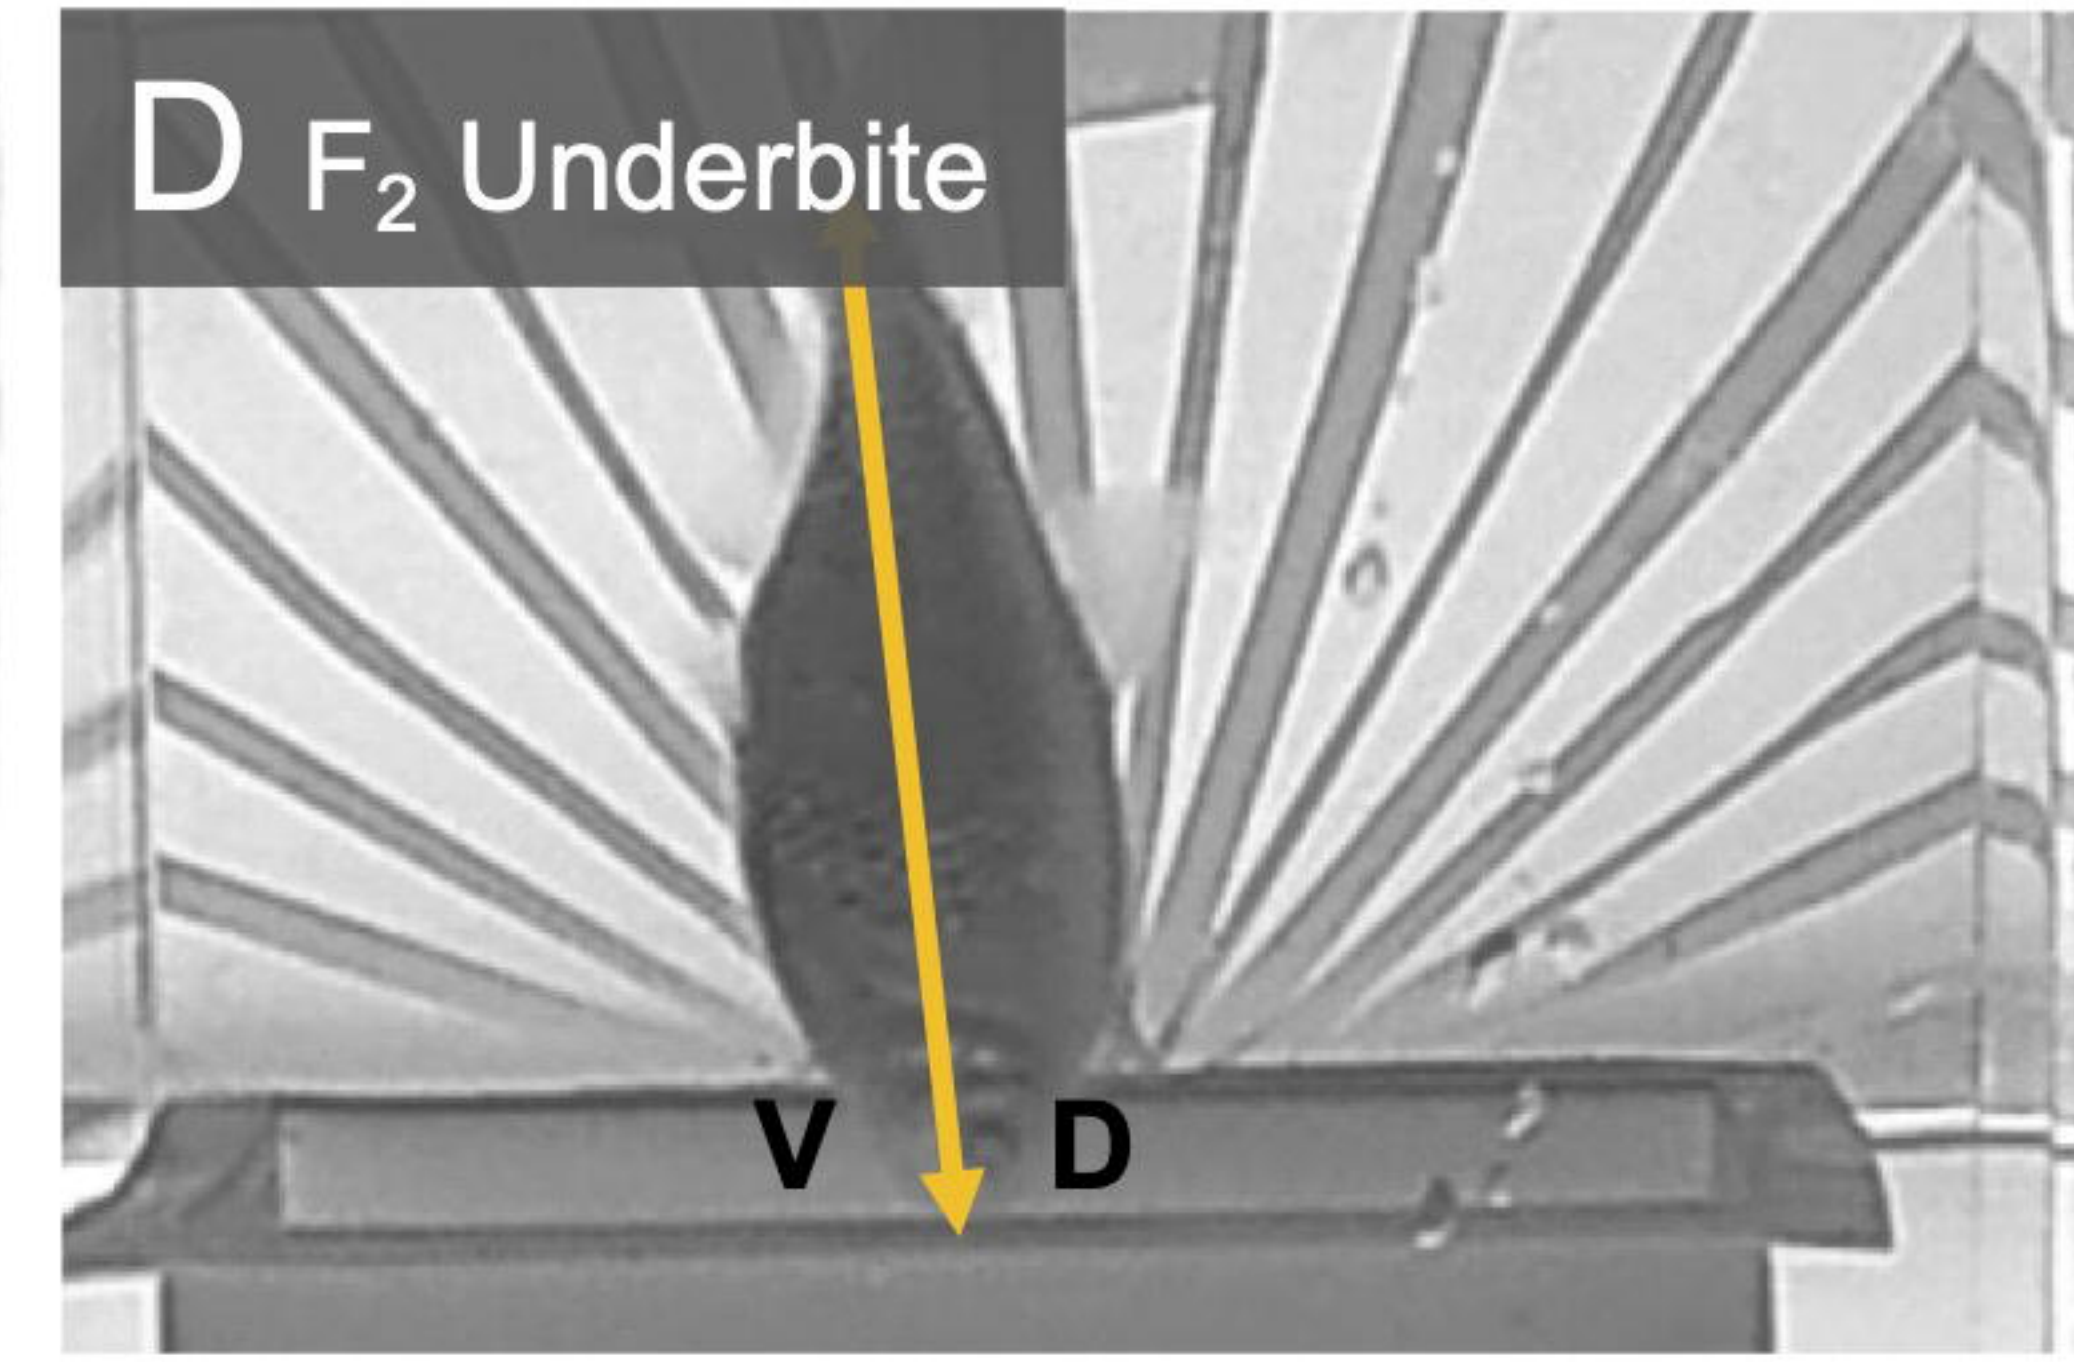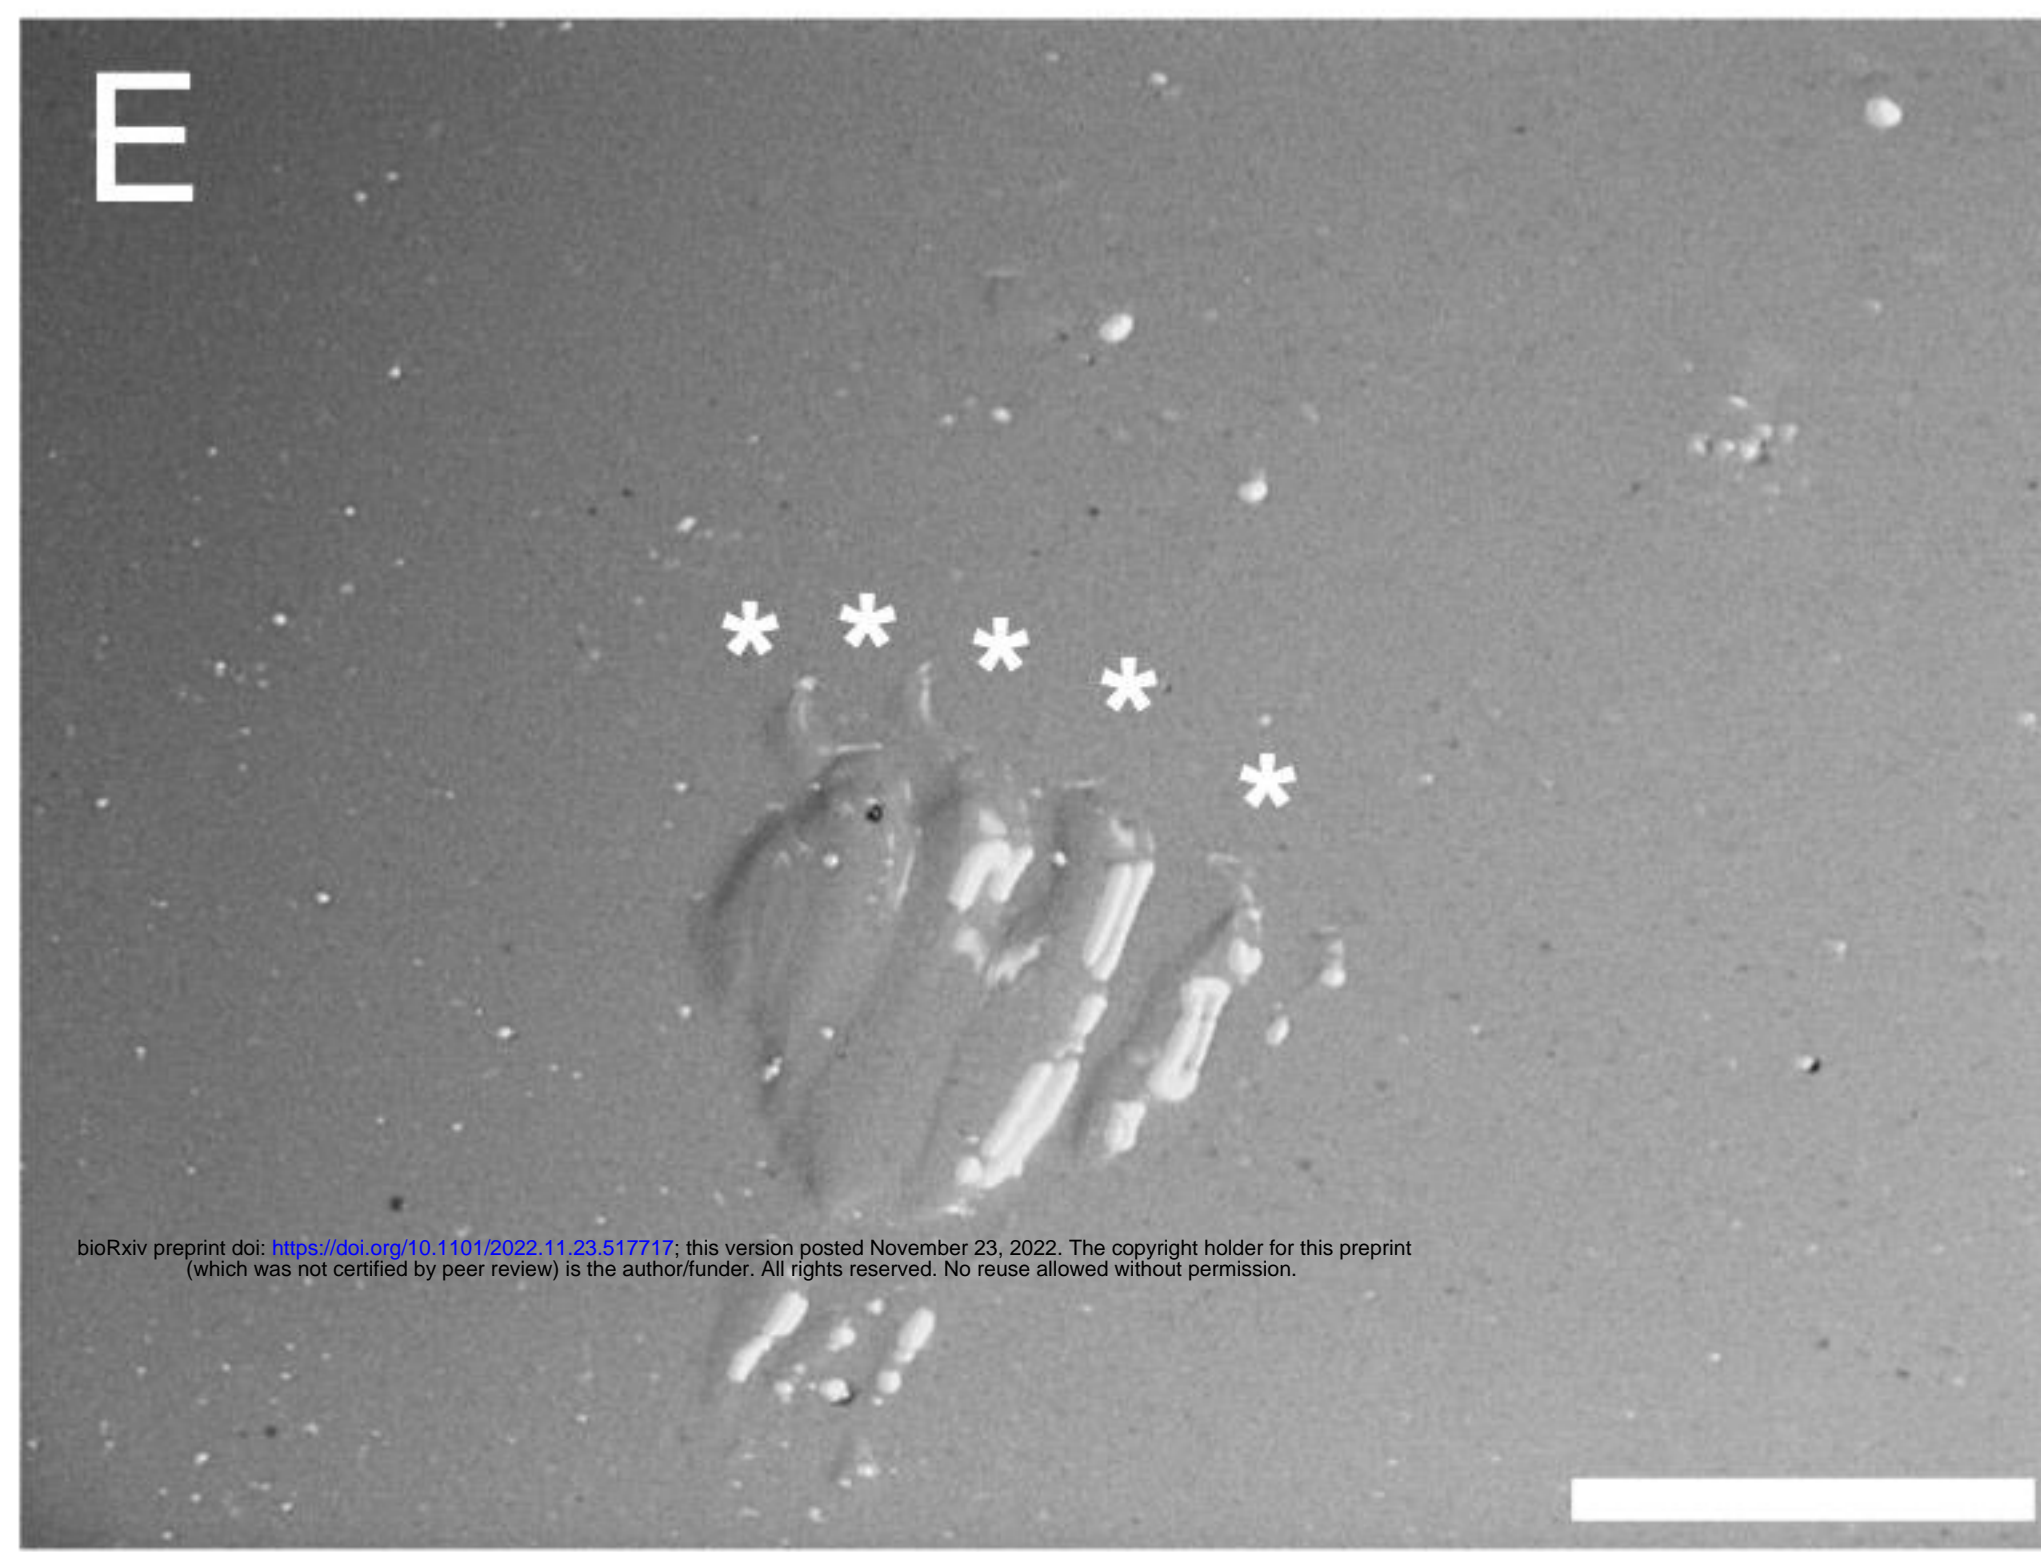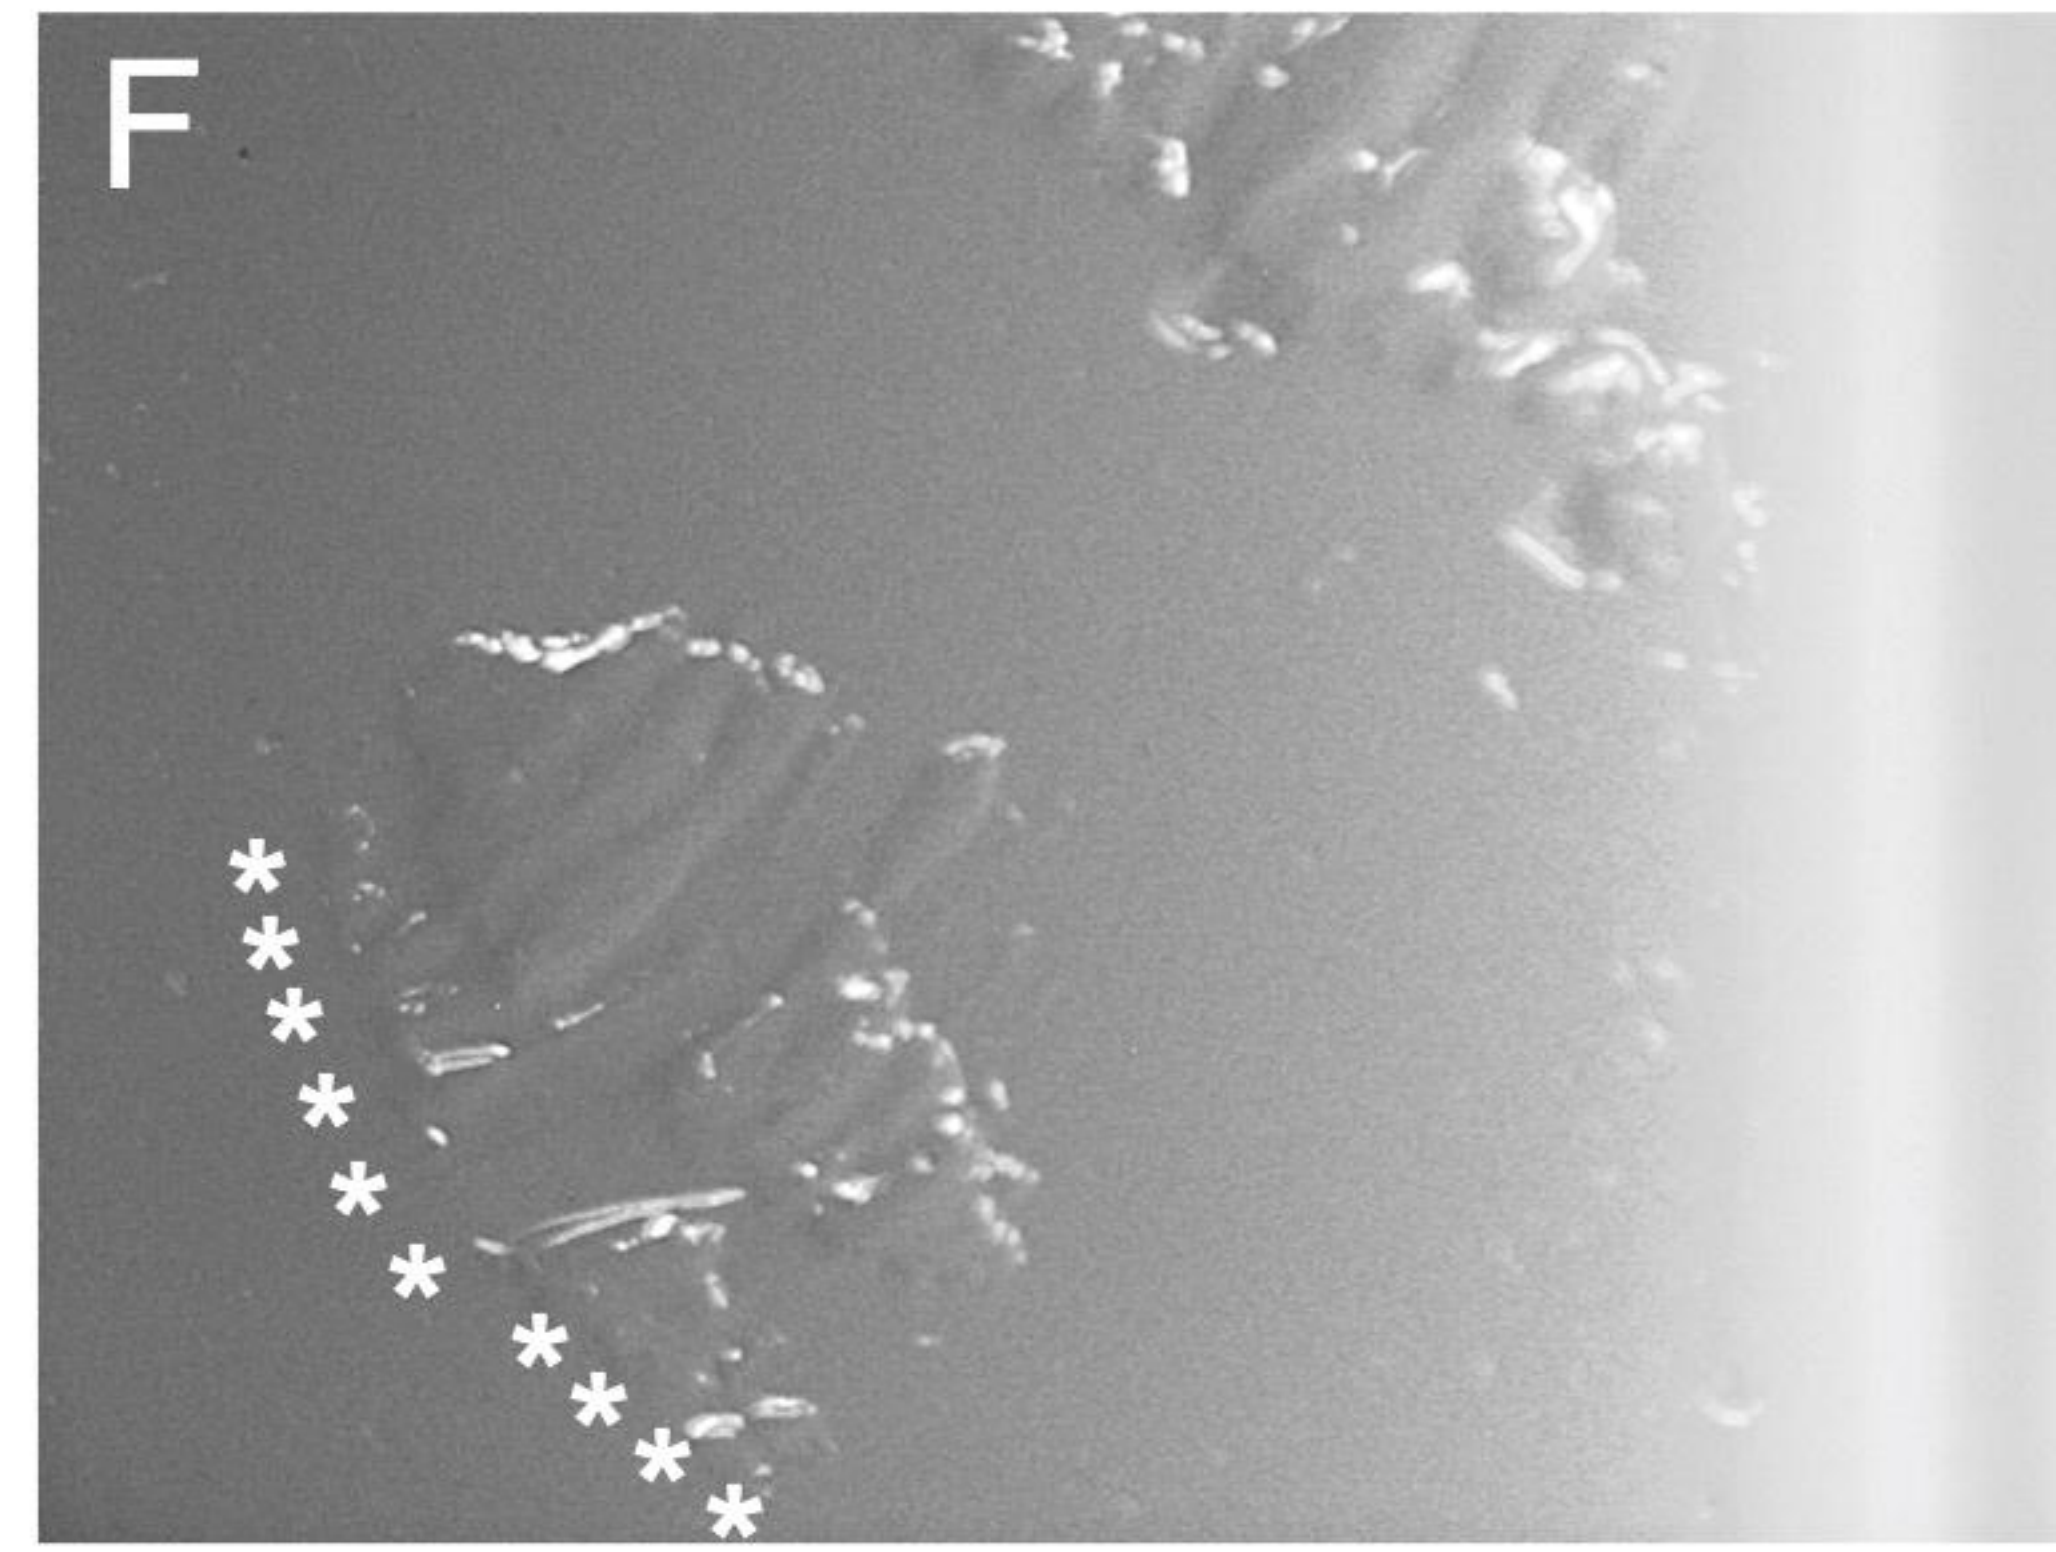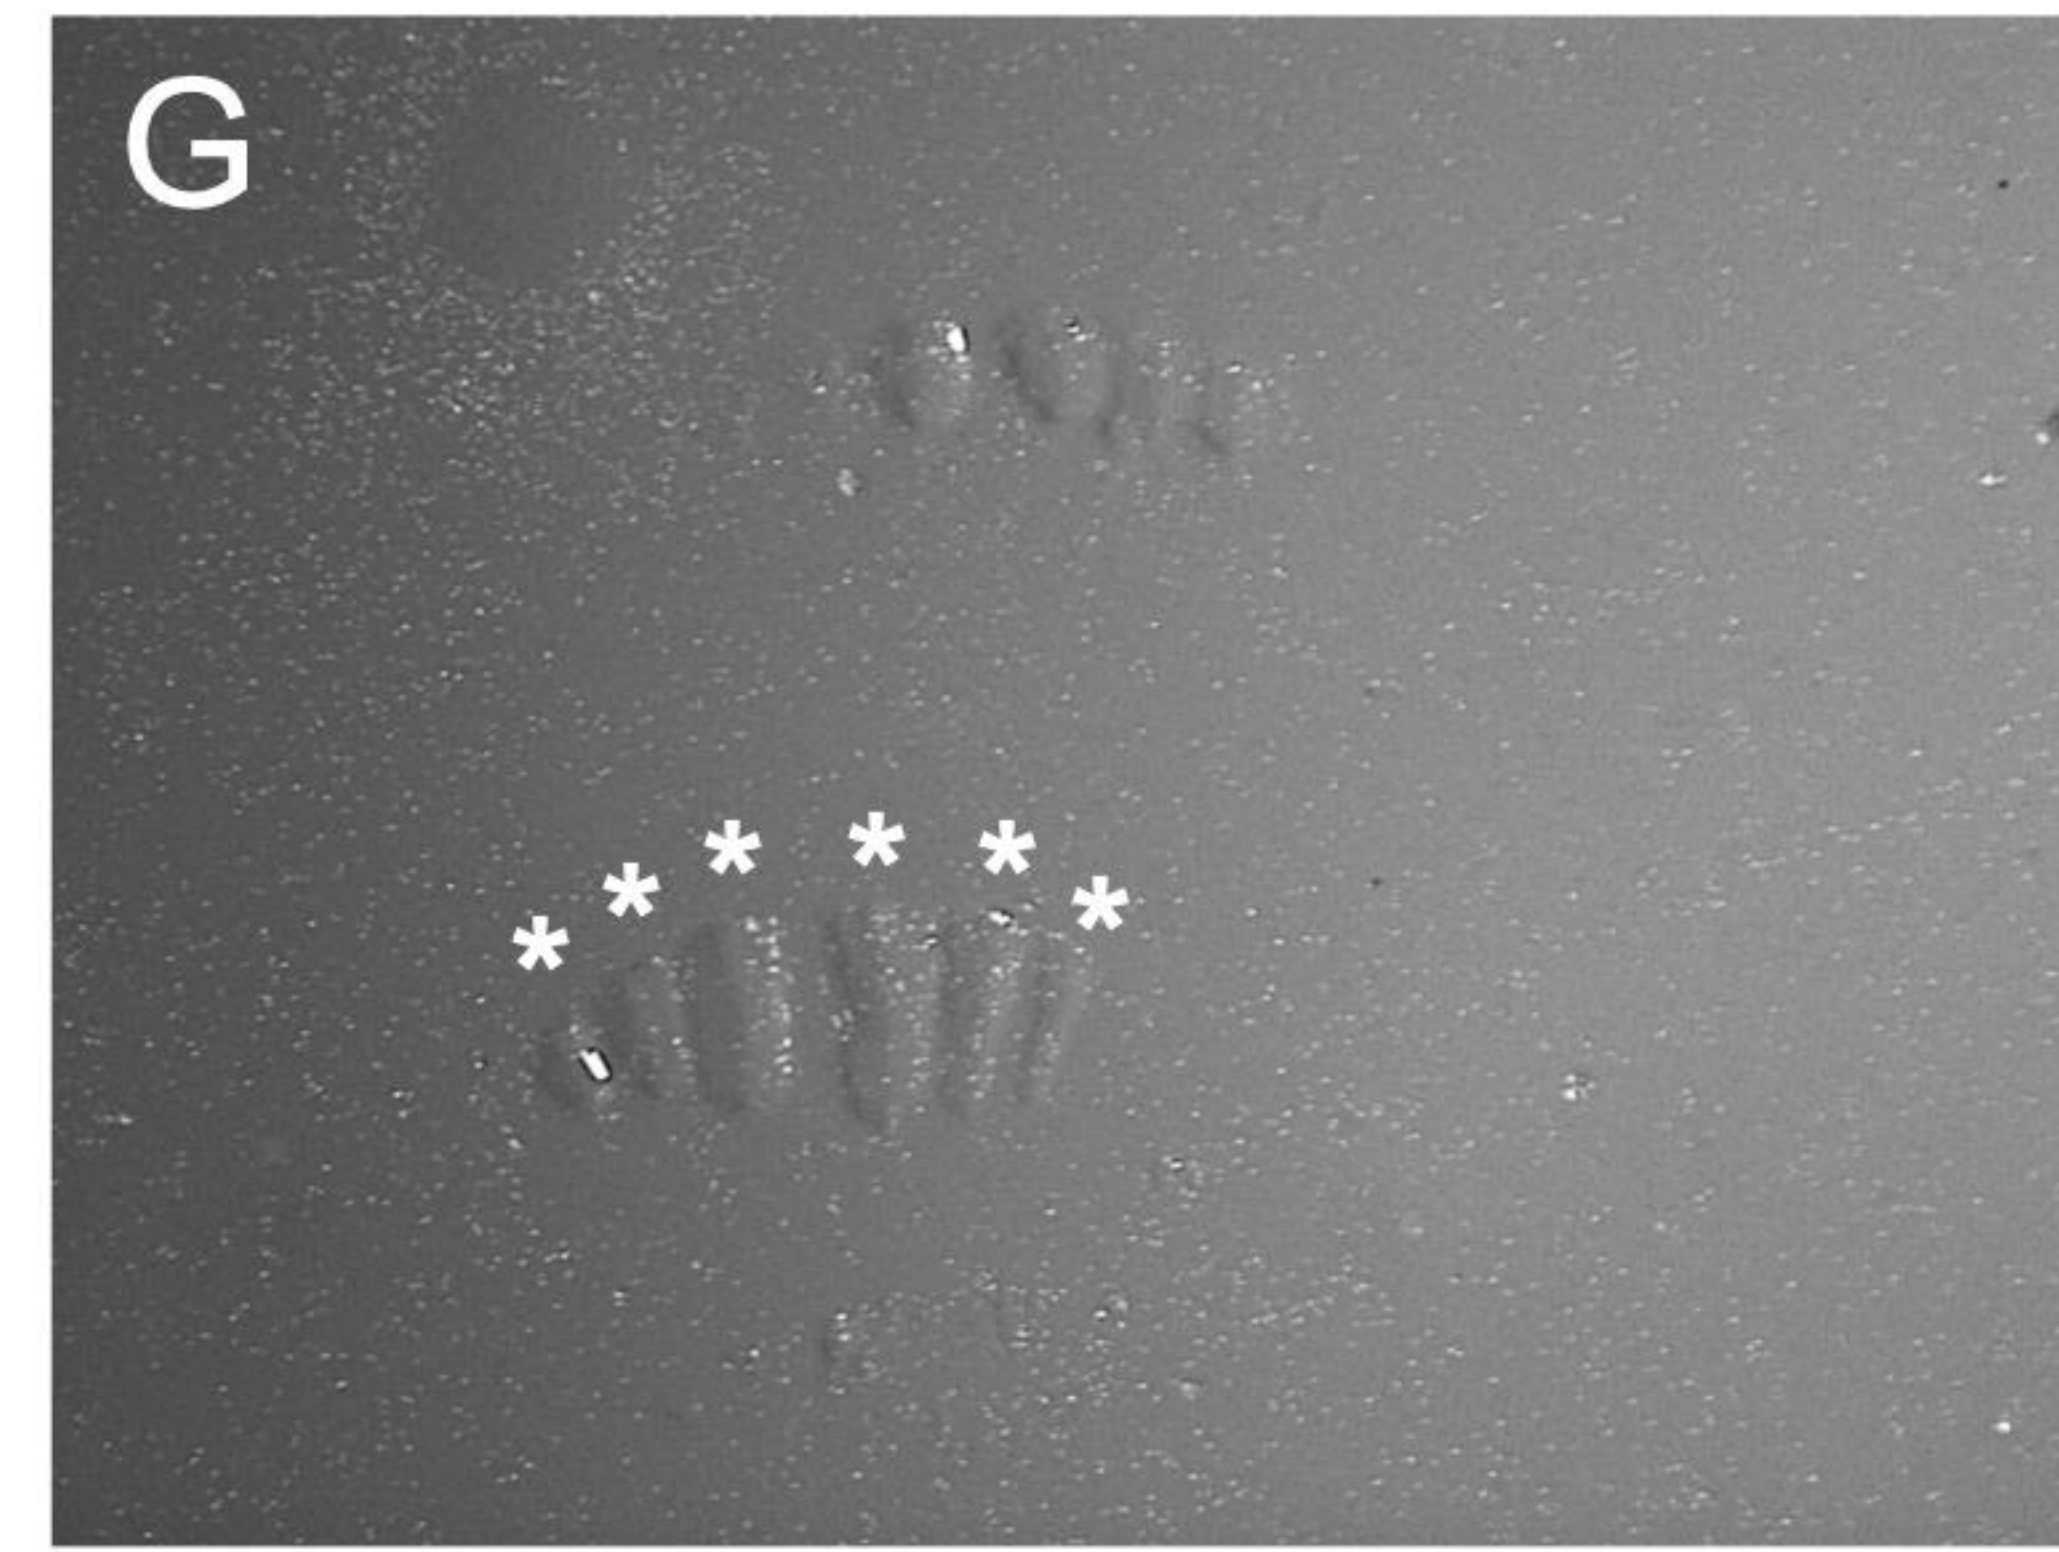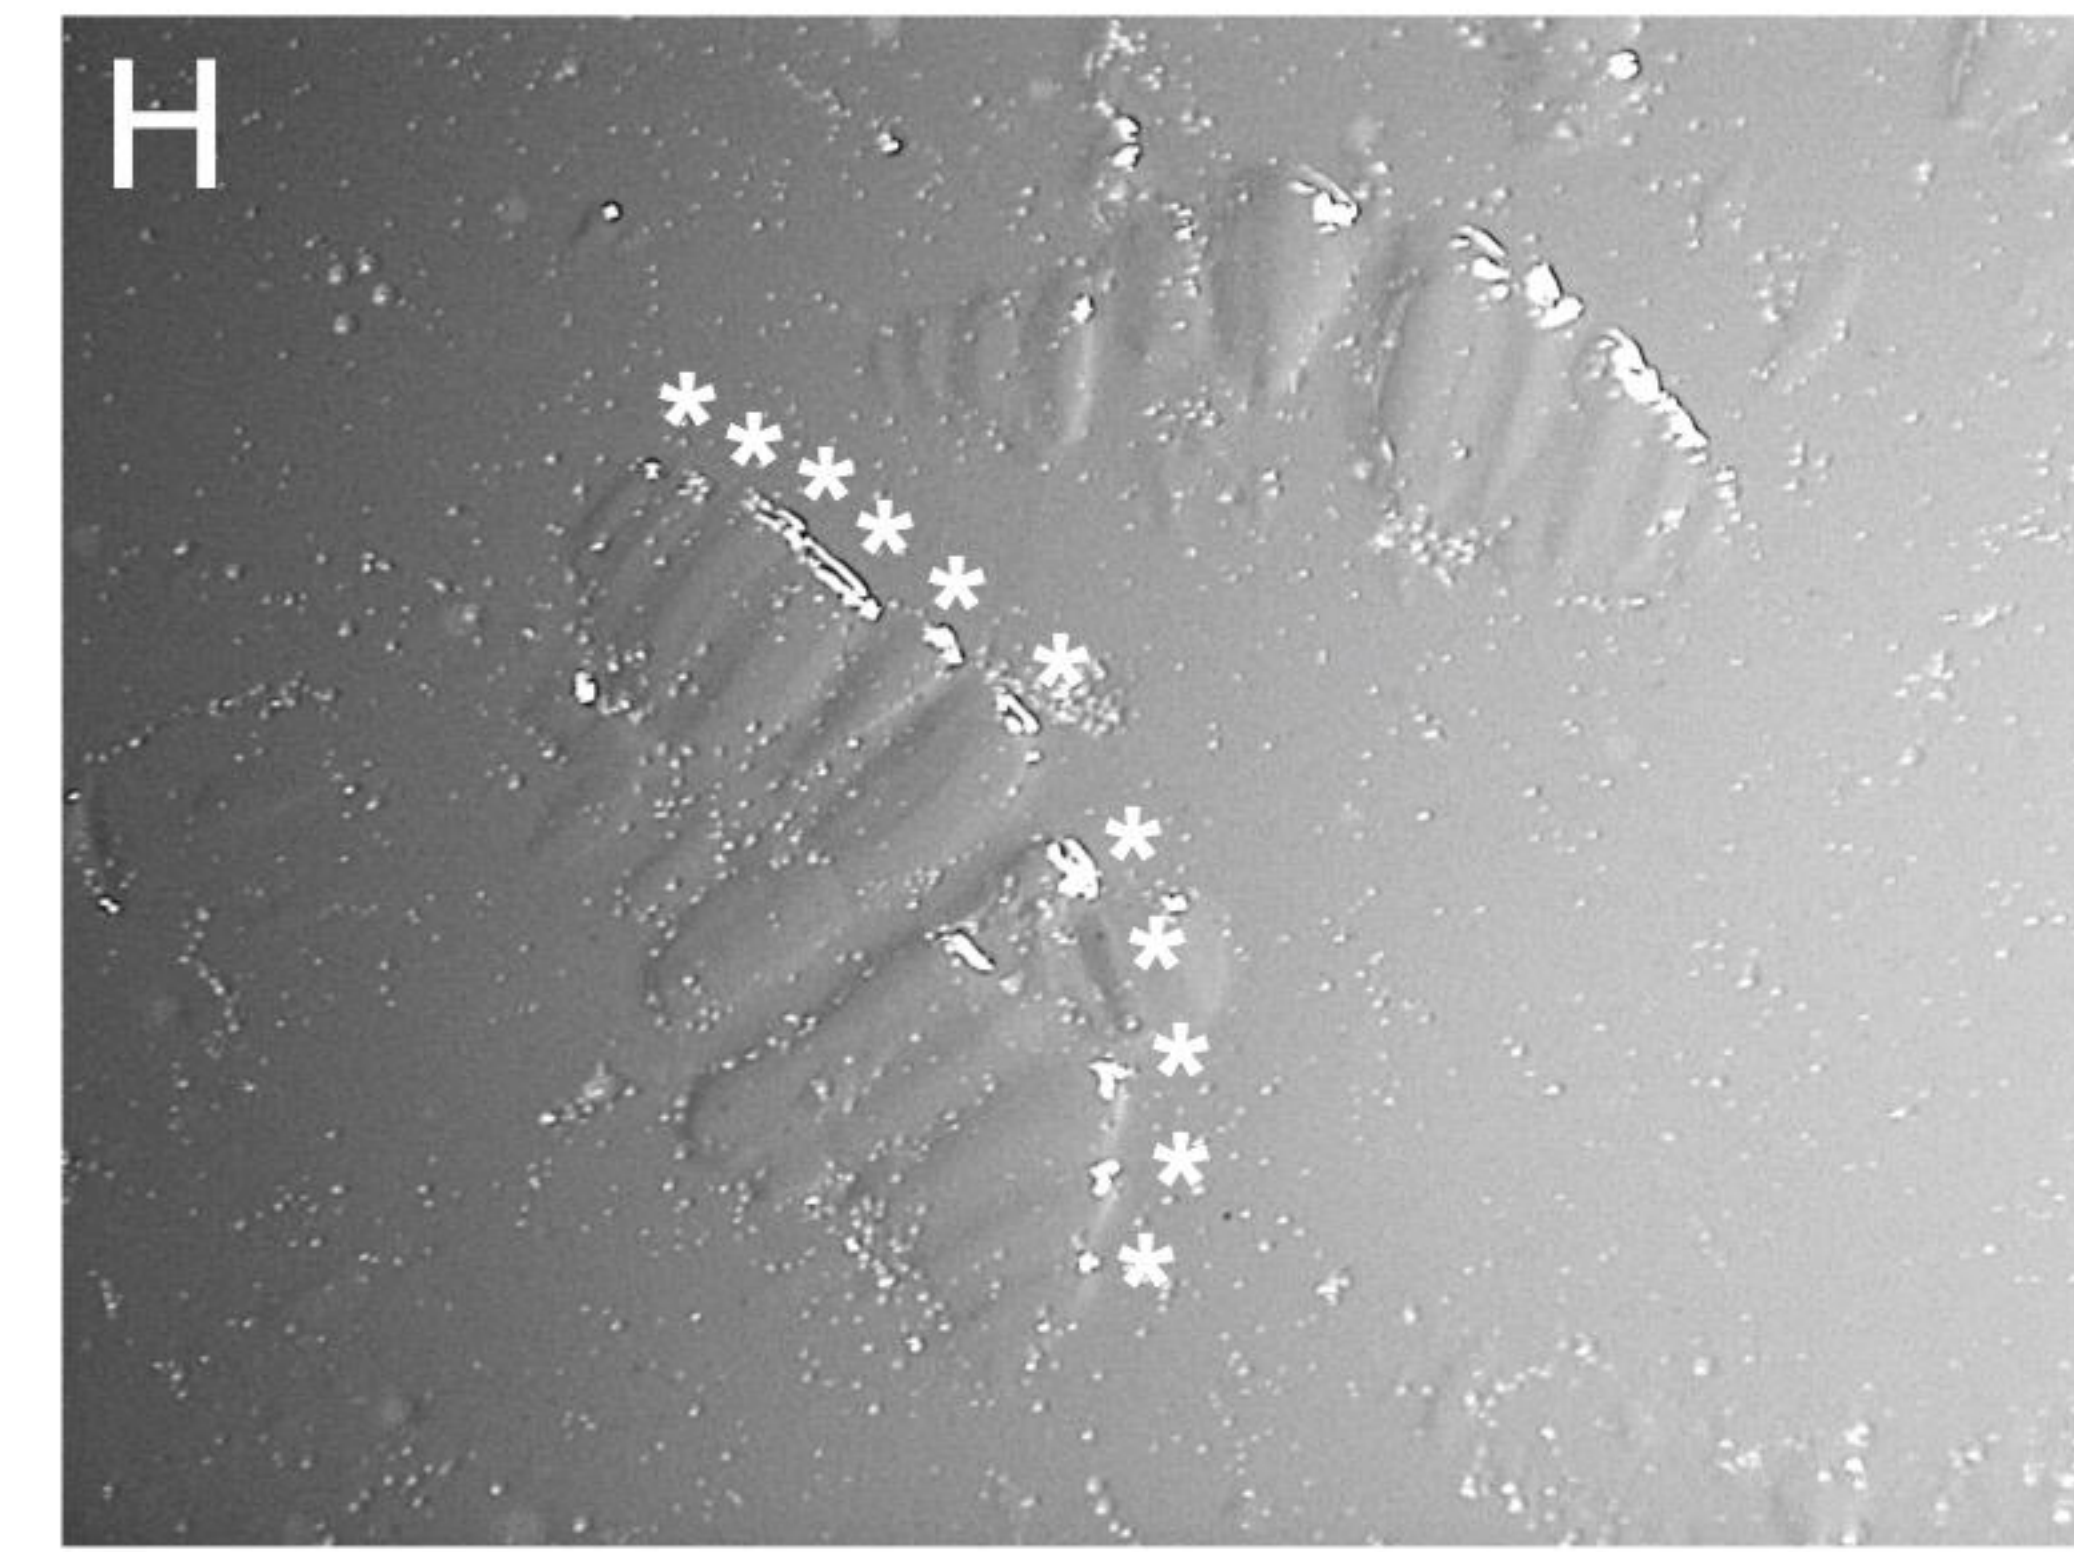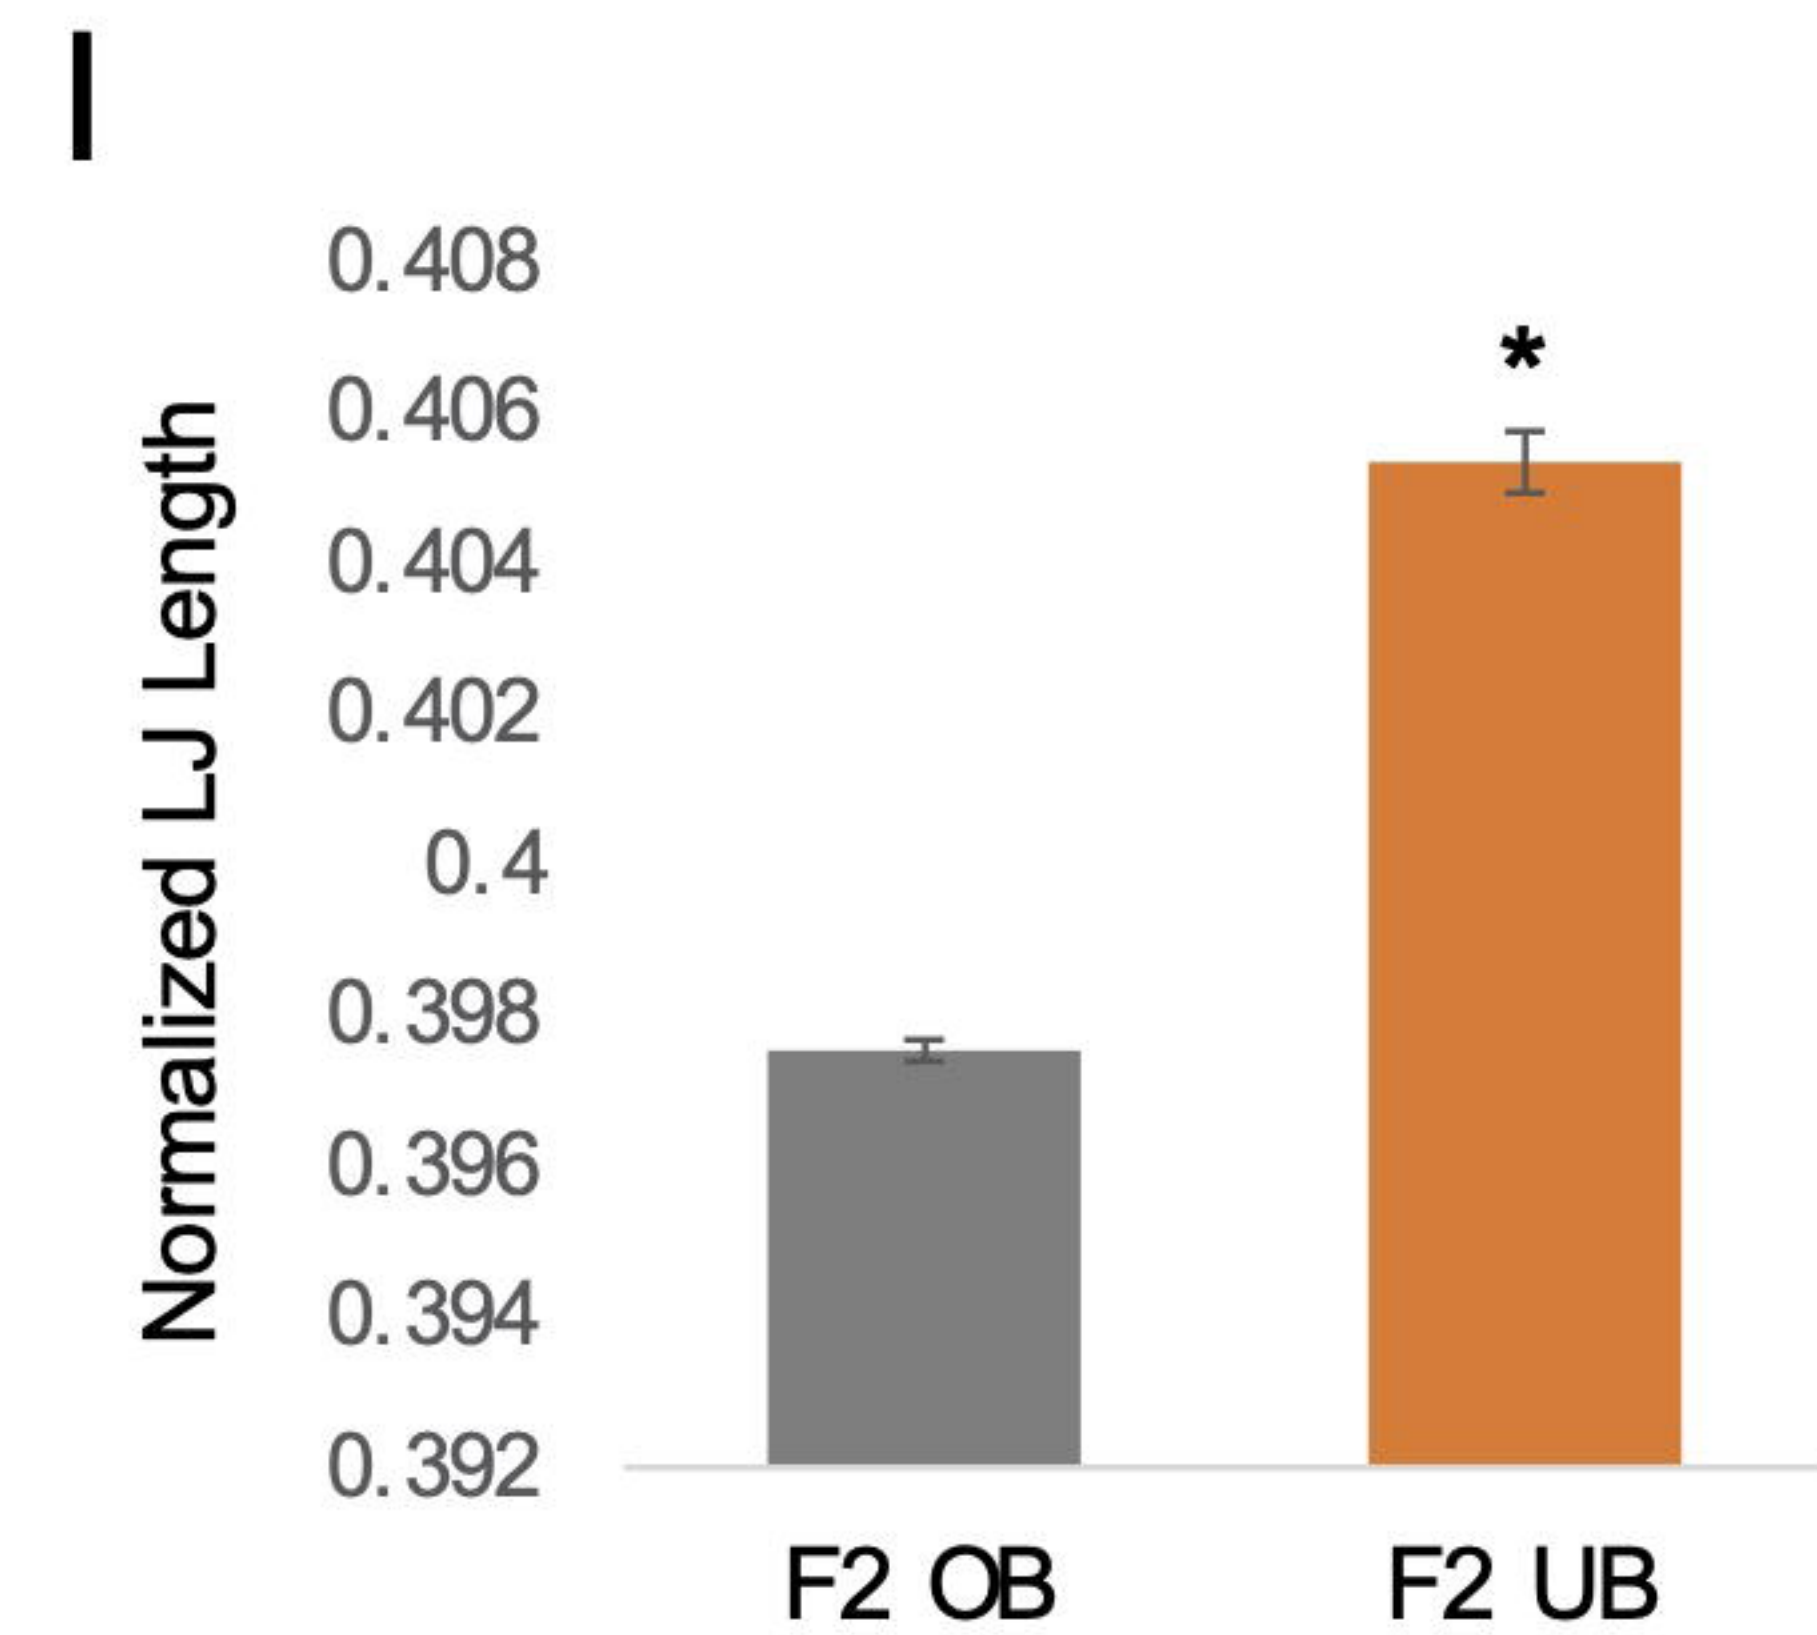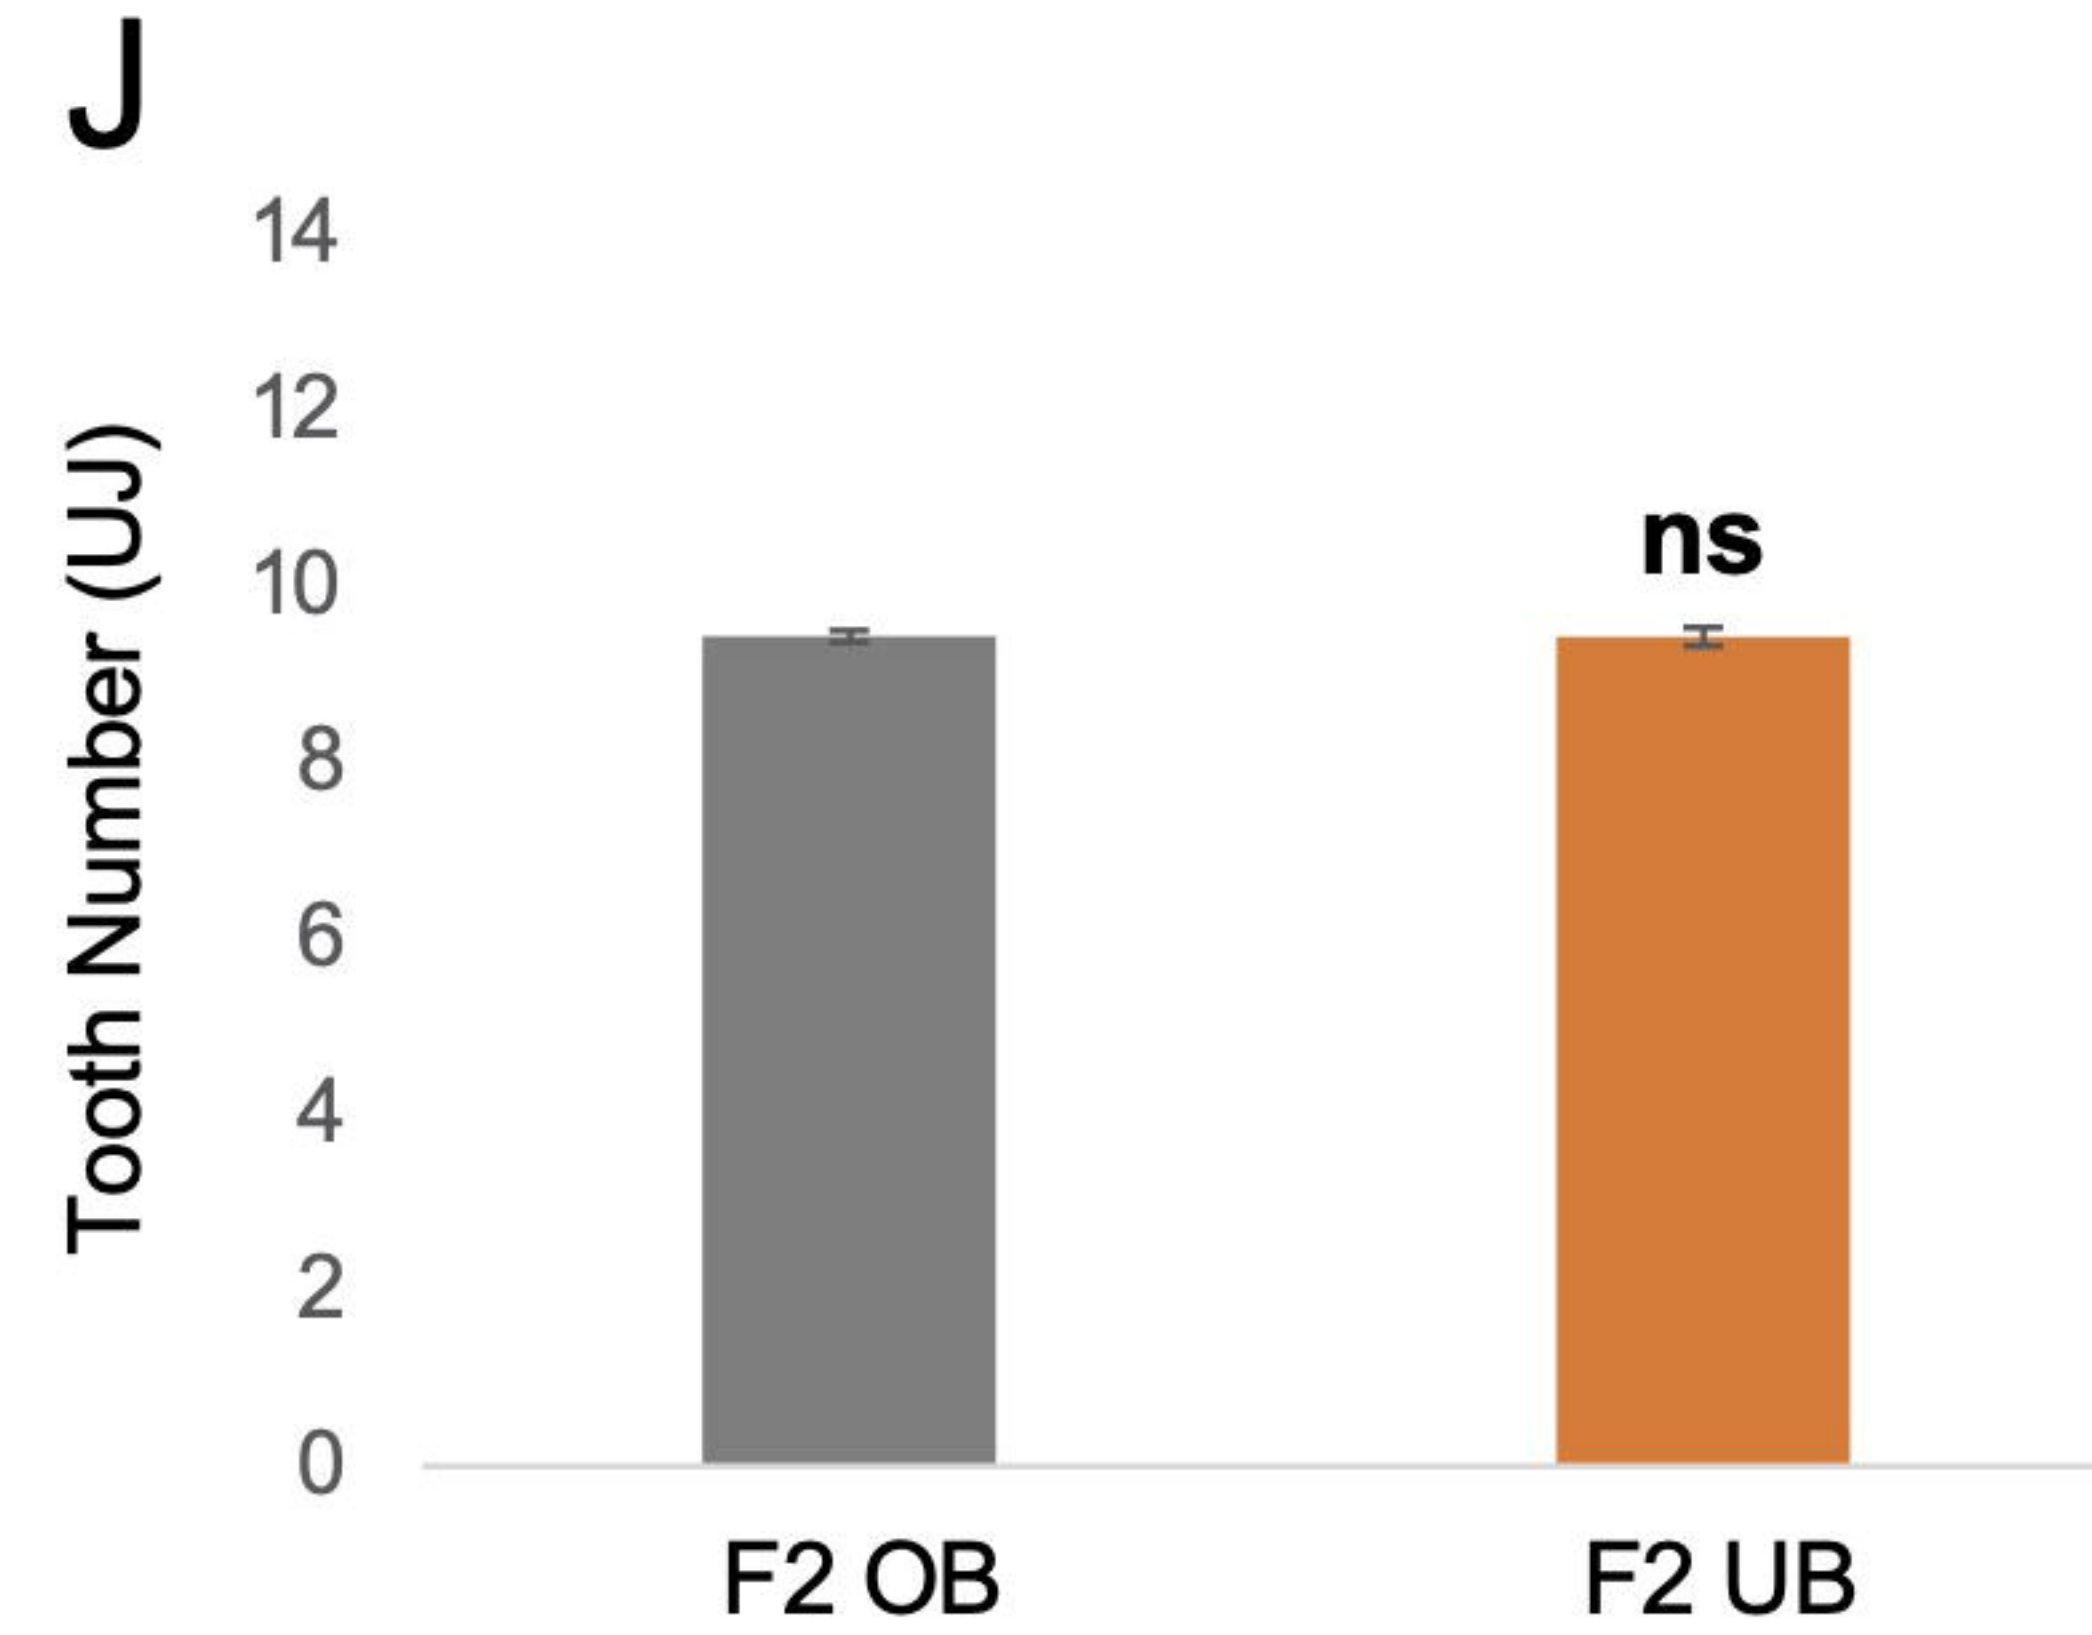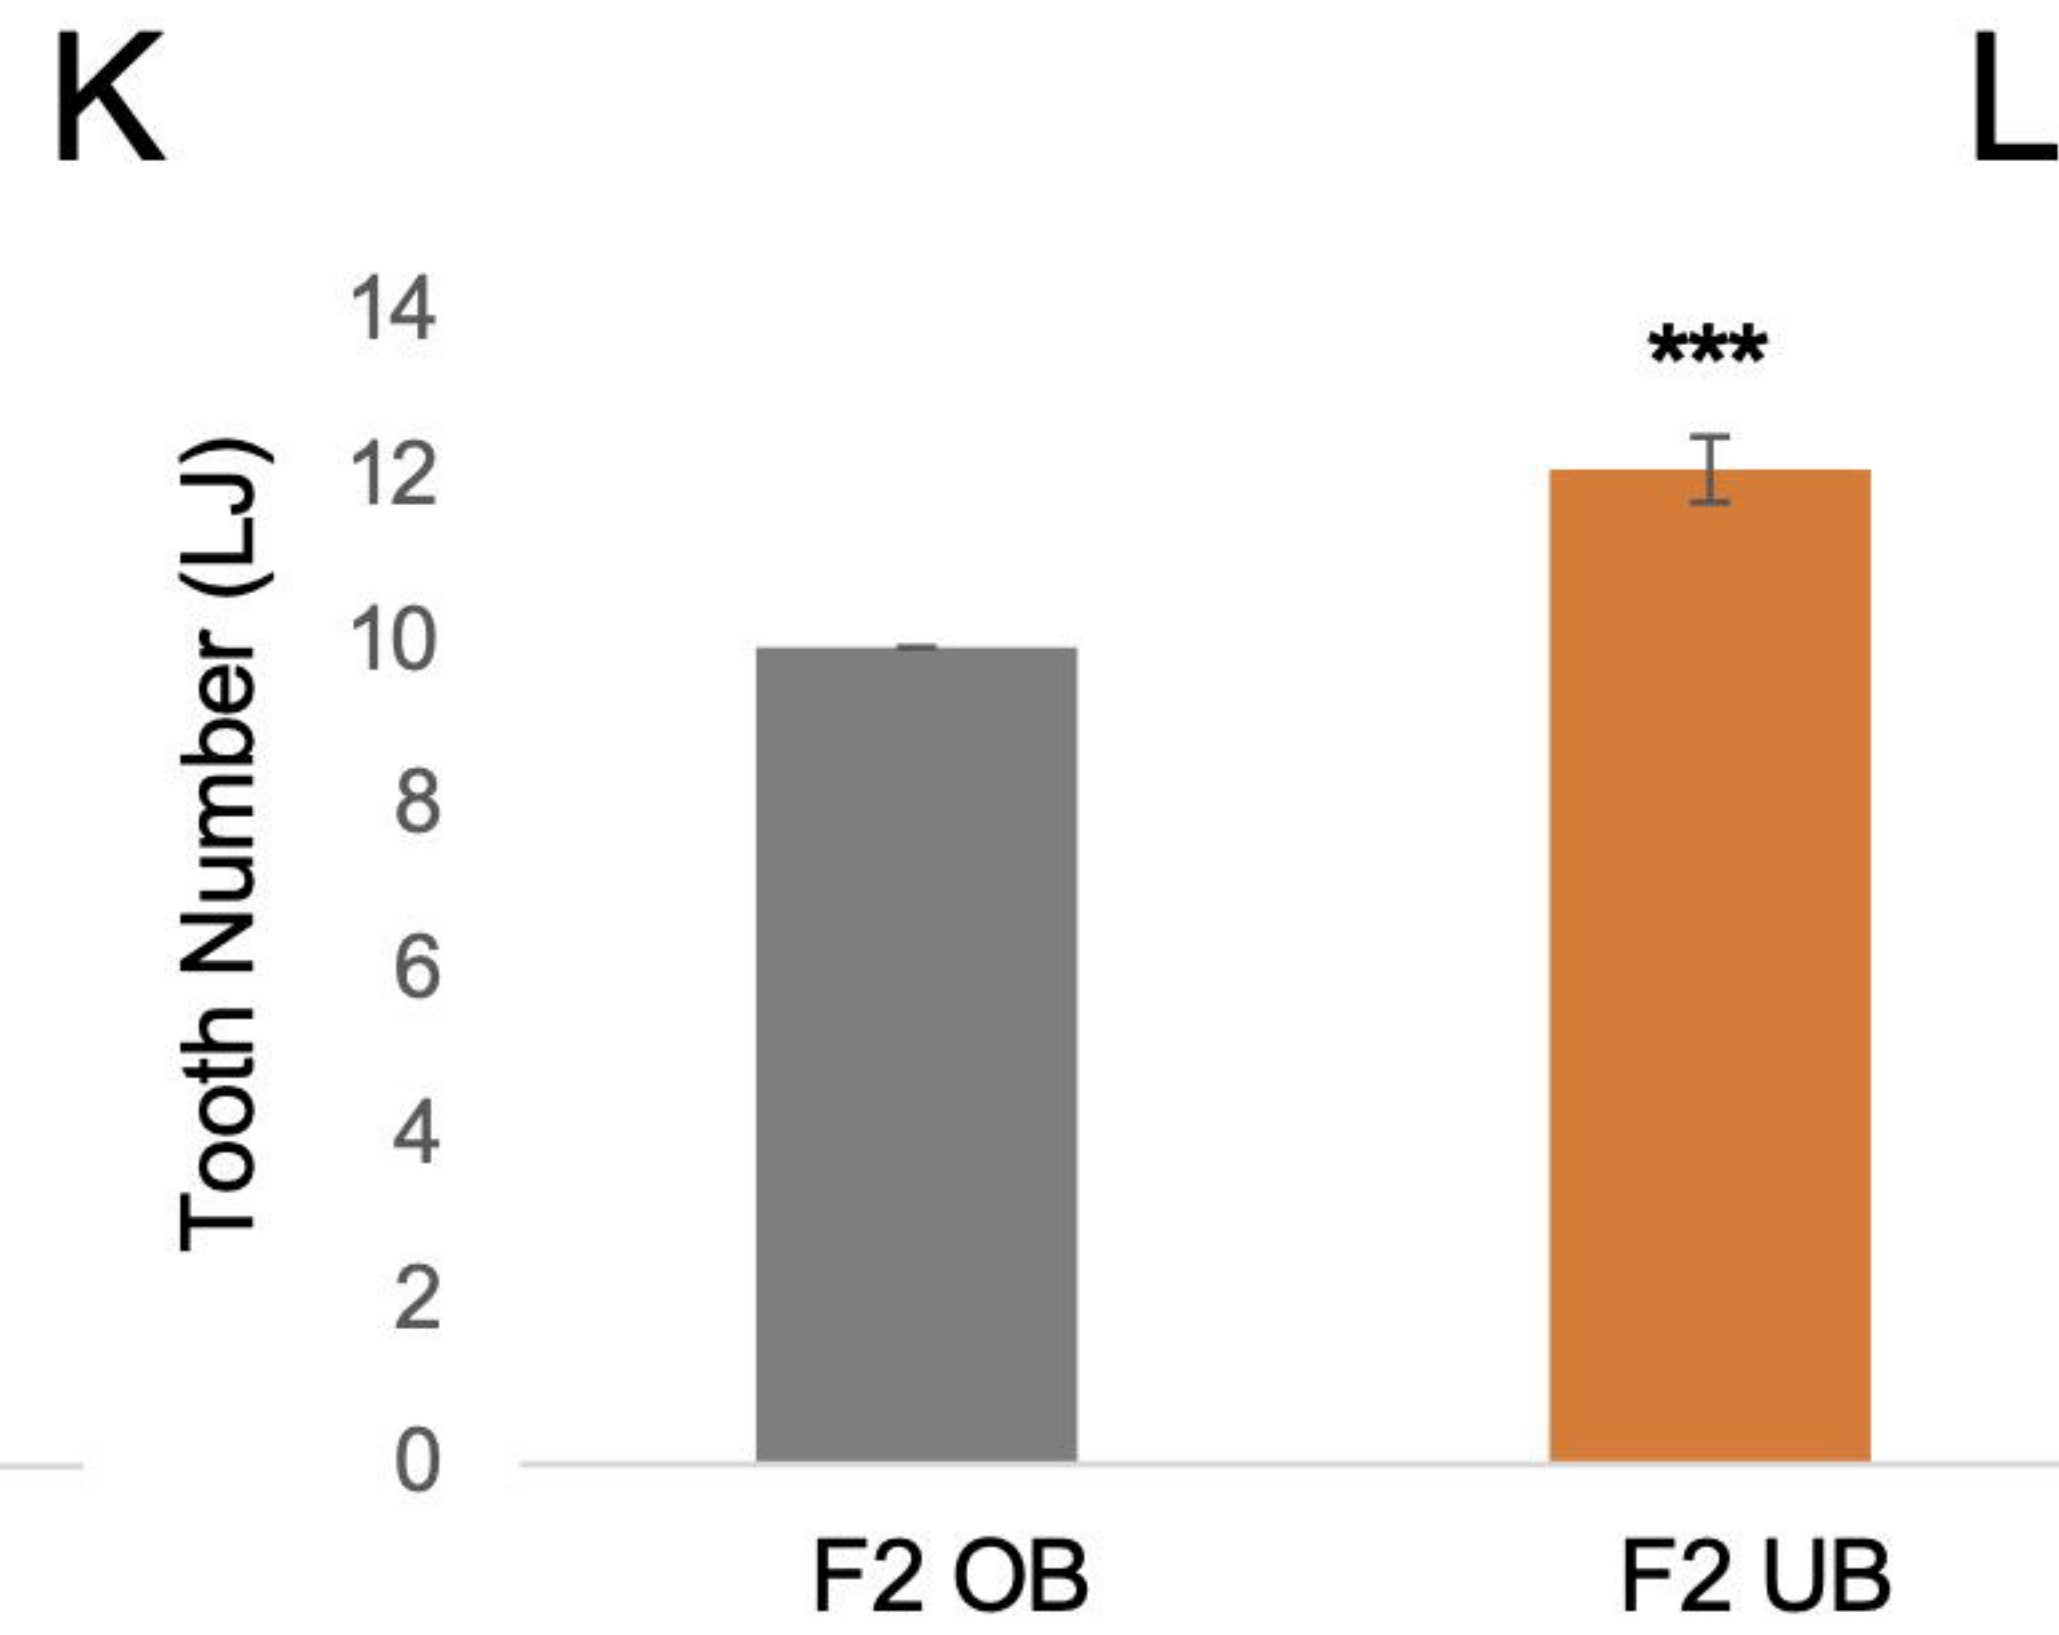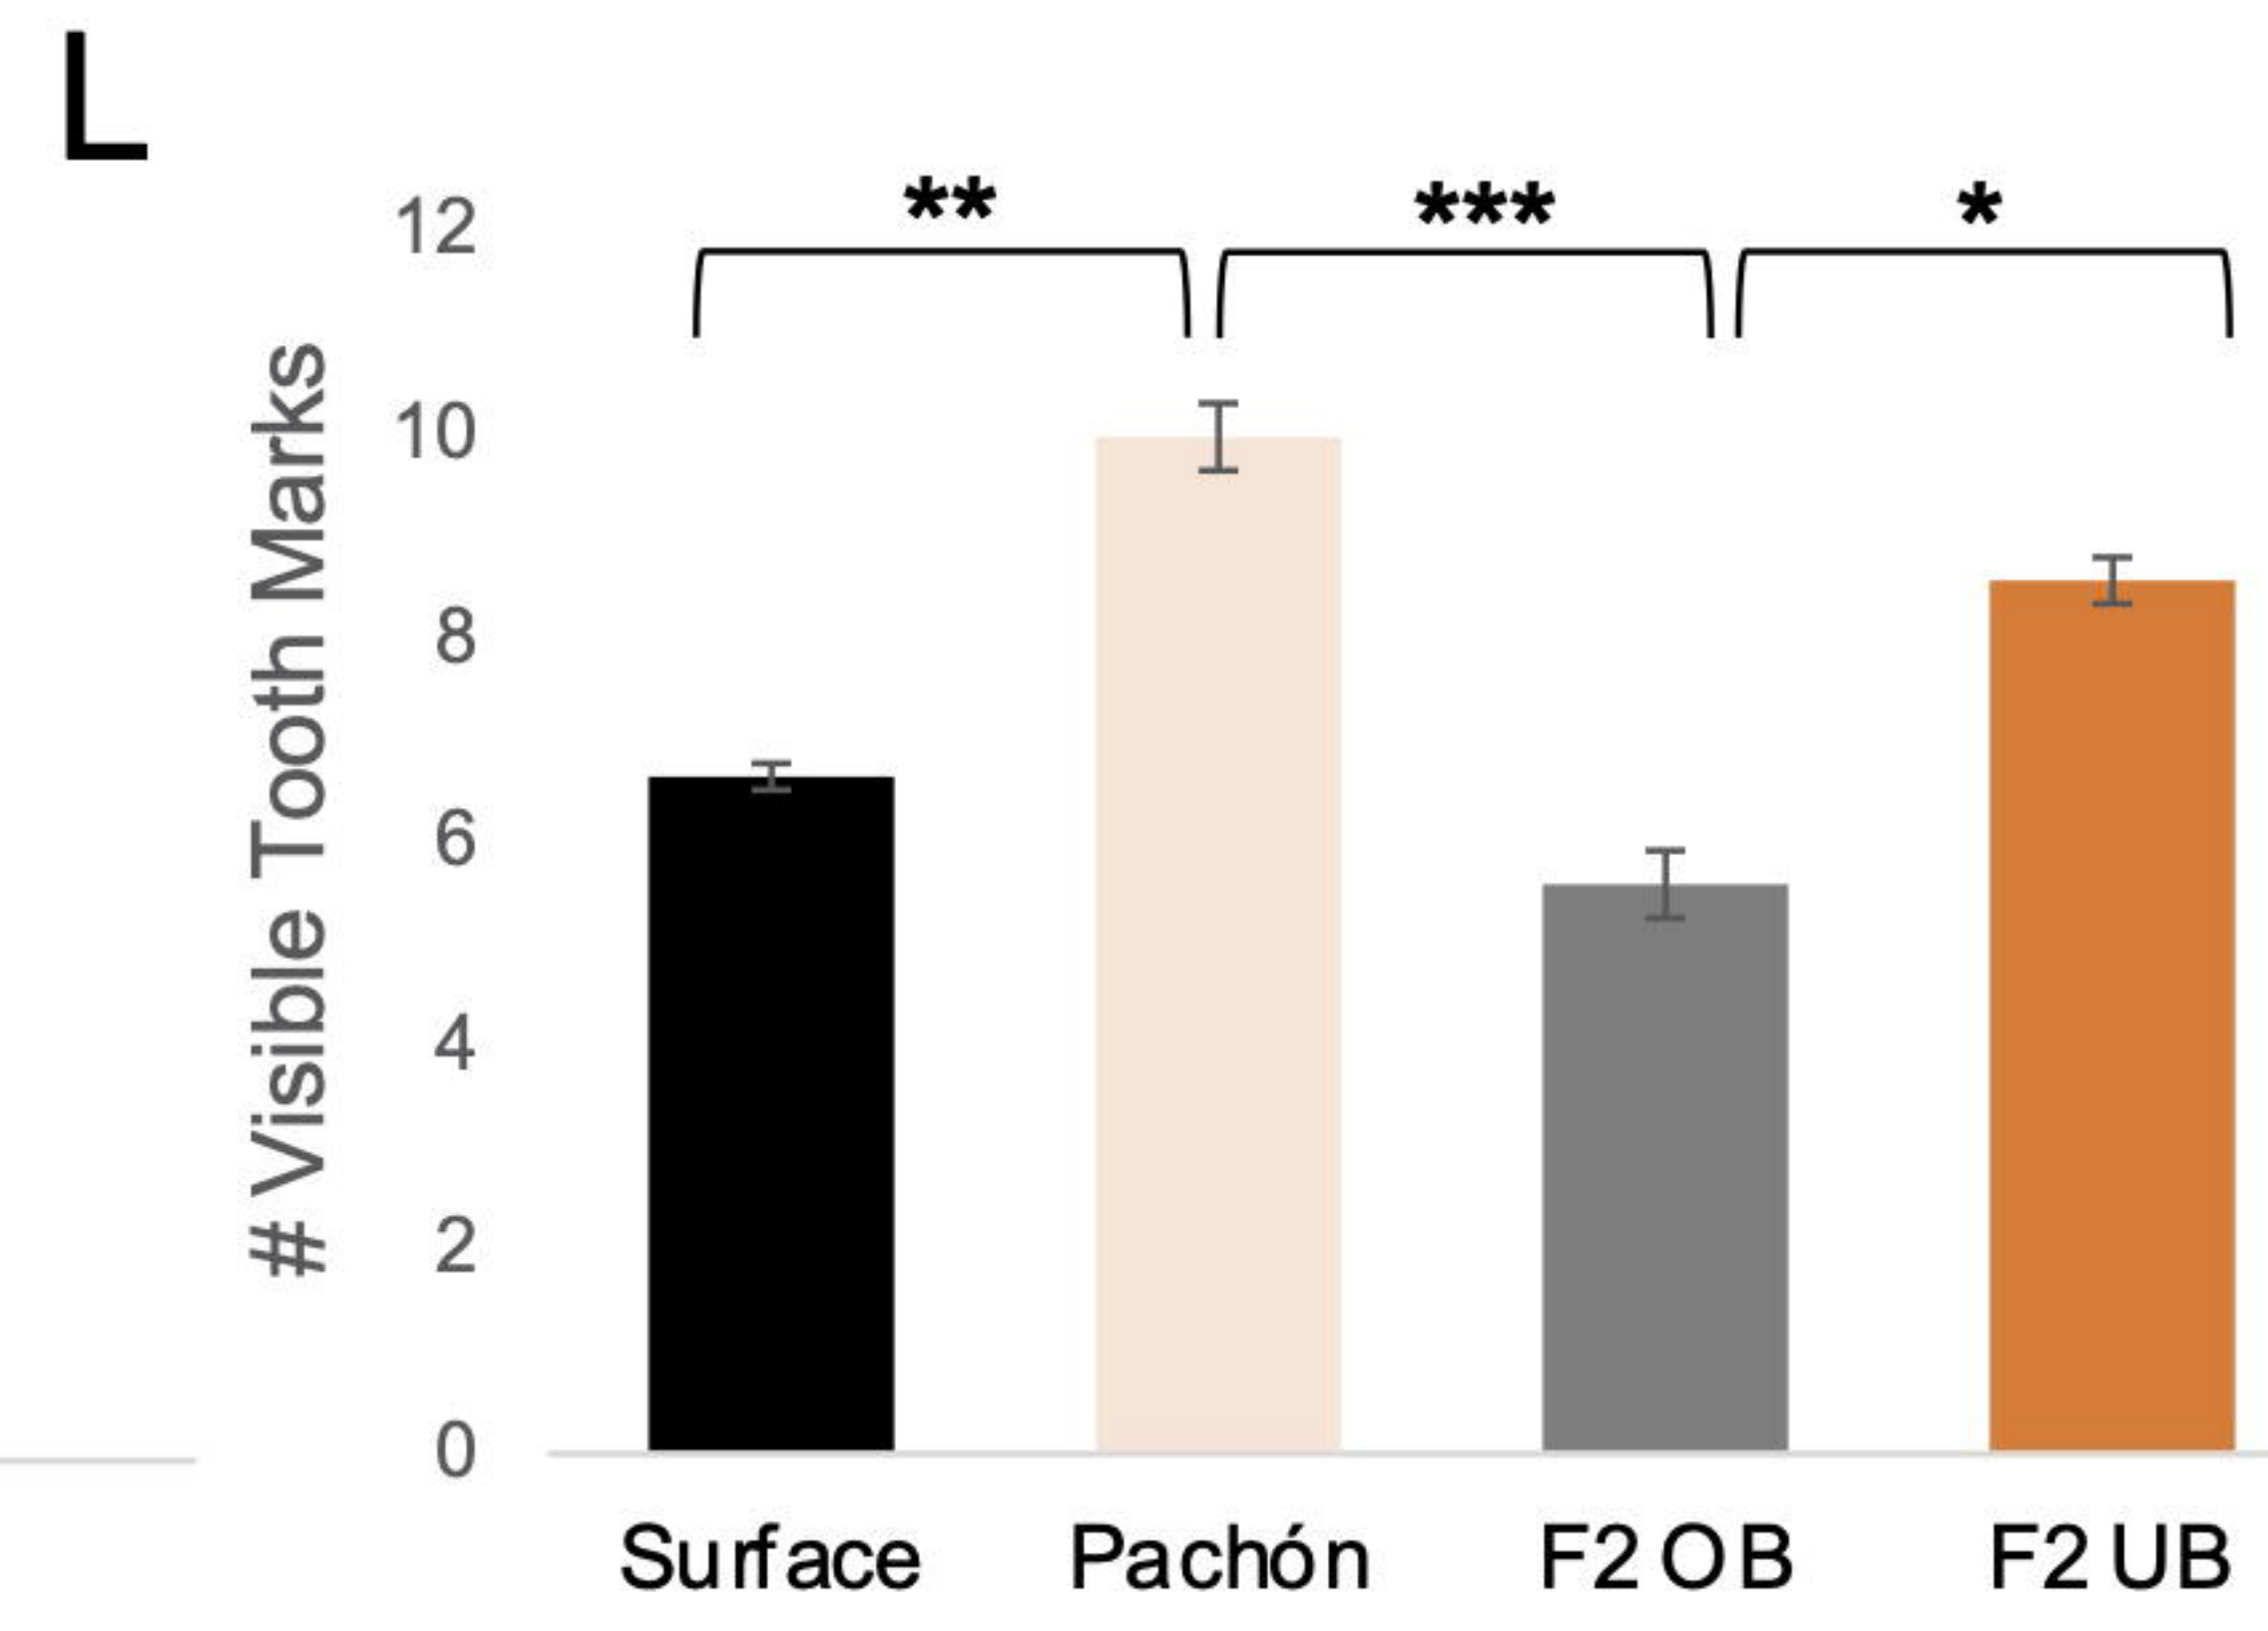

bioRxiv preprint doi: <https://doi.org/10.1101/2022.11.23.517712>; this version posted November 23, 2022. The copyright holder for this preprint (which was not certified by peer review) is the author/funder. All rights reserved. No reuse allowed without permission.



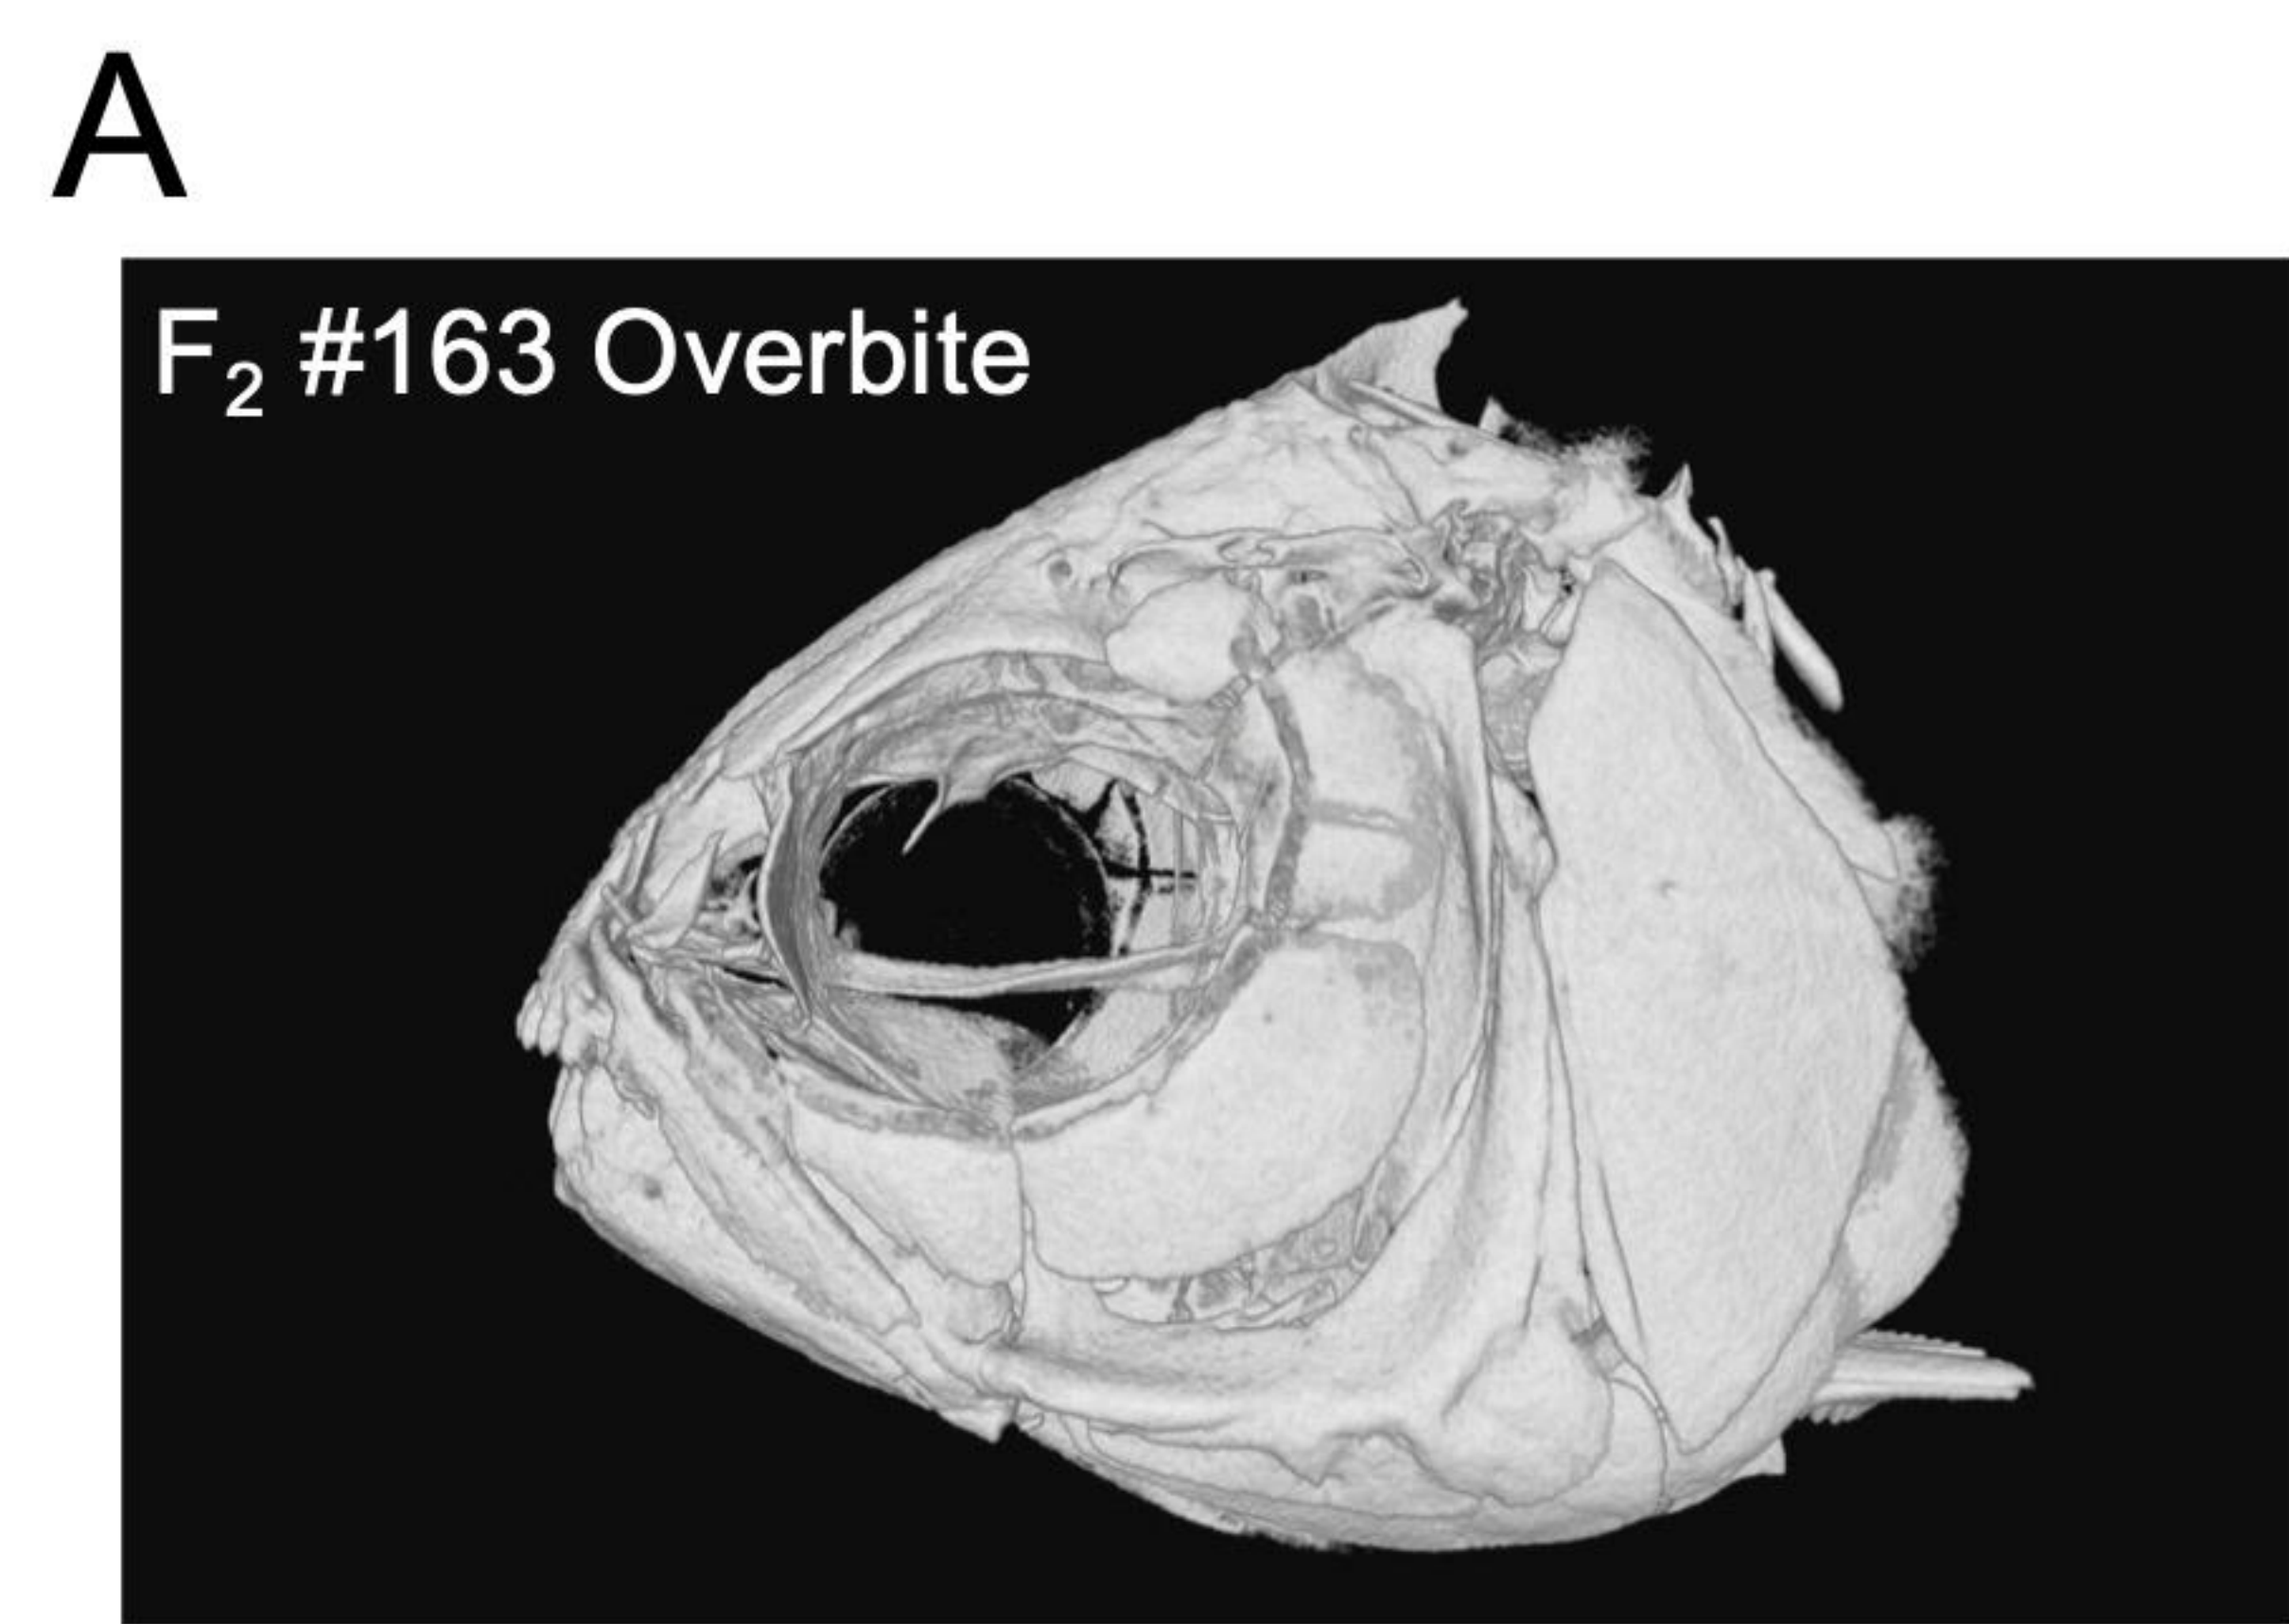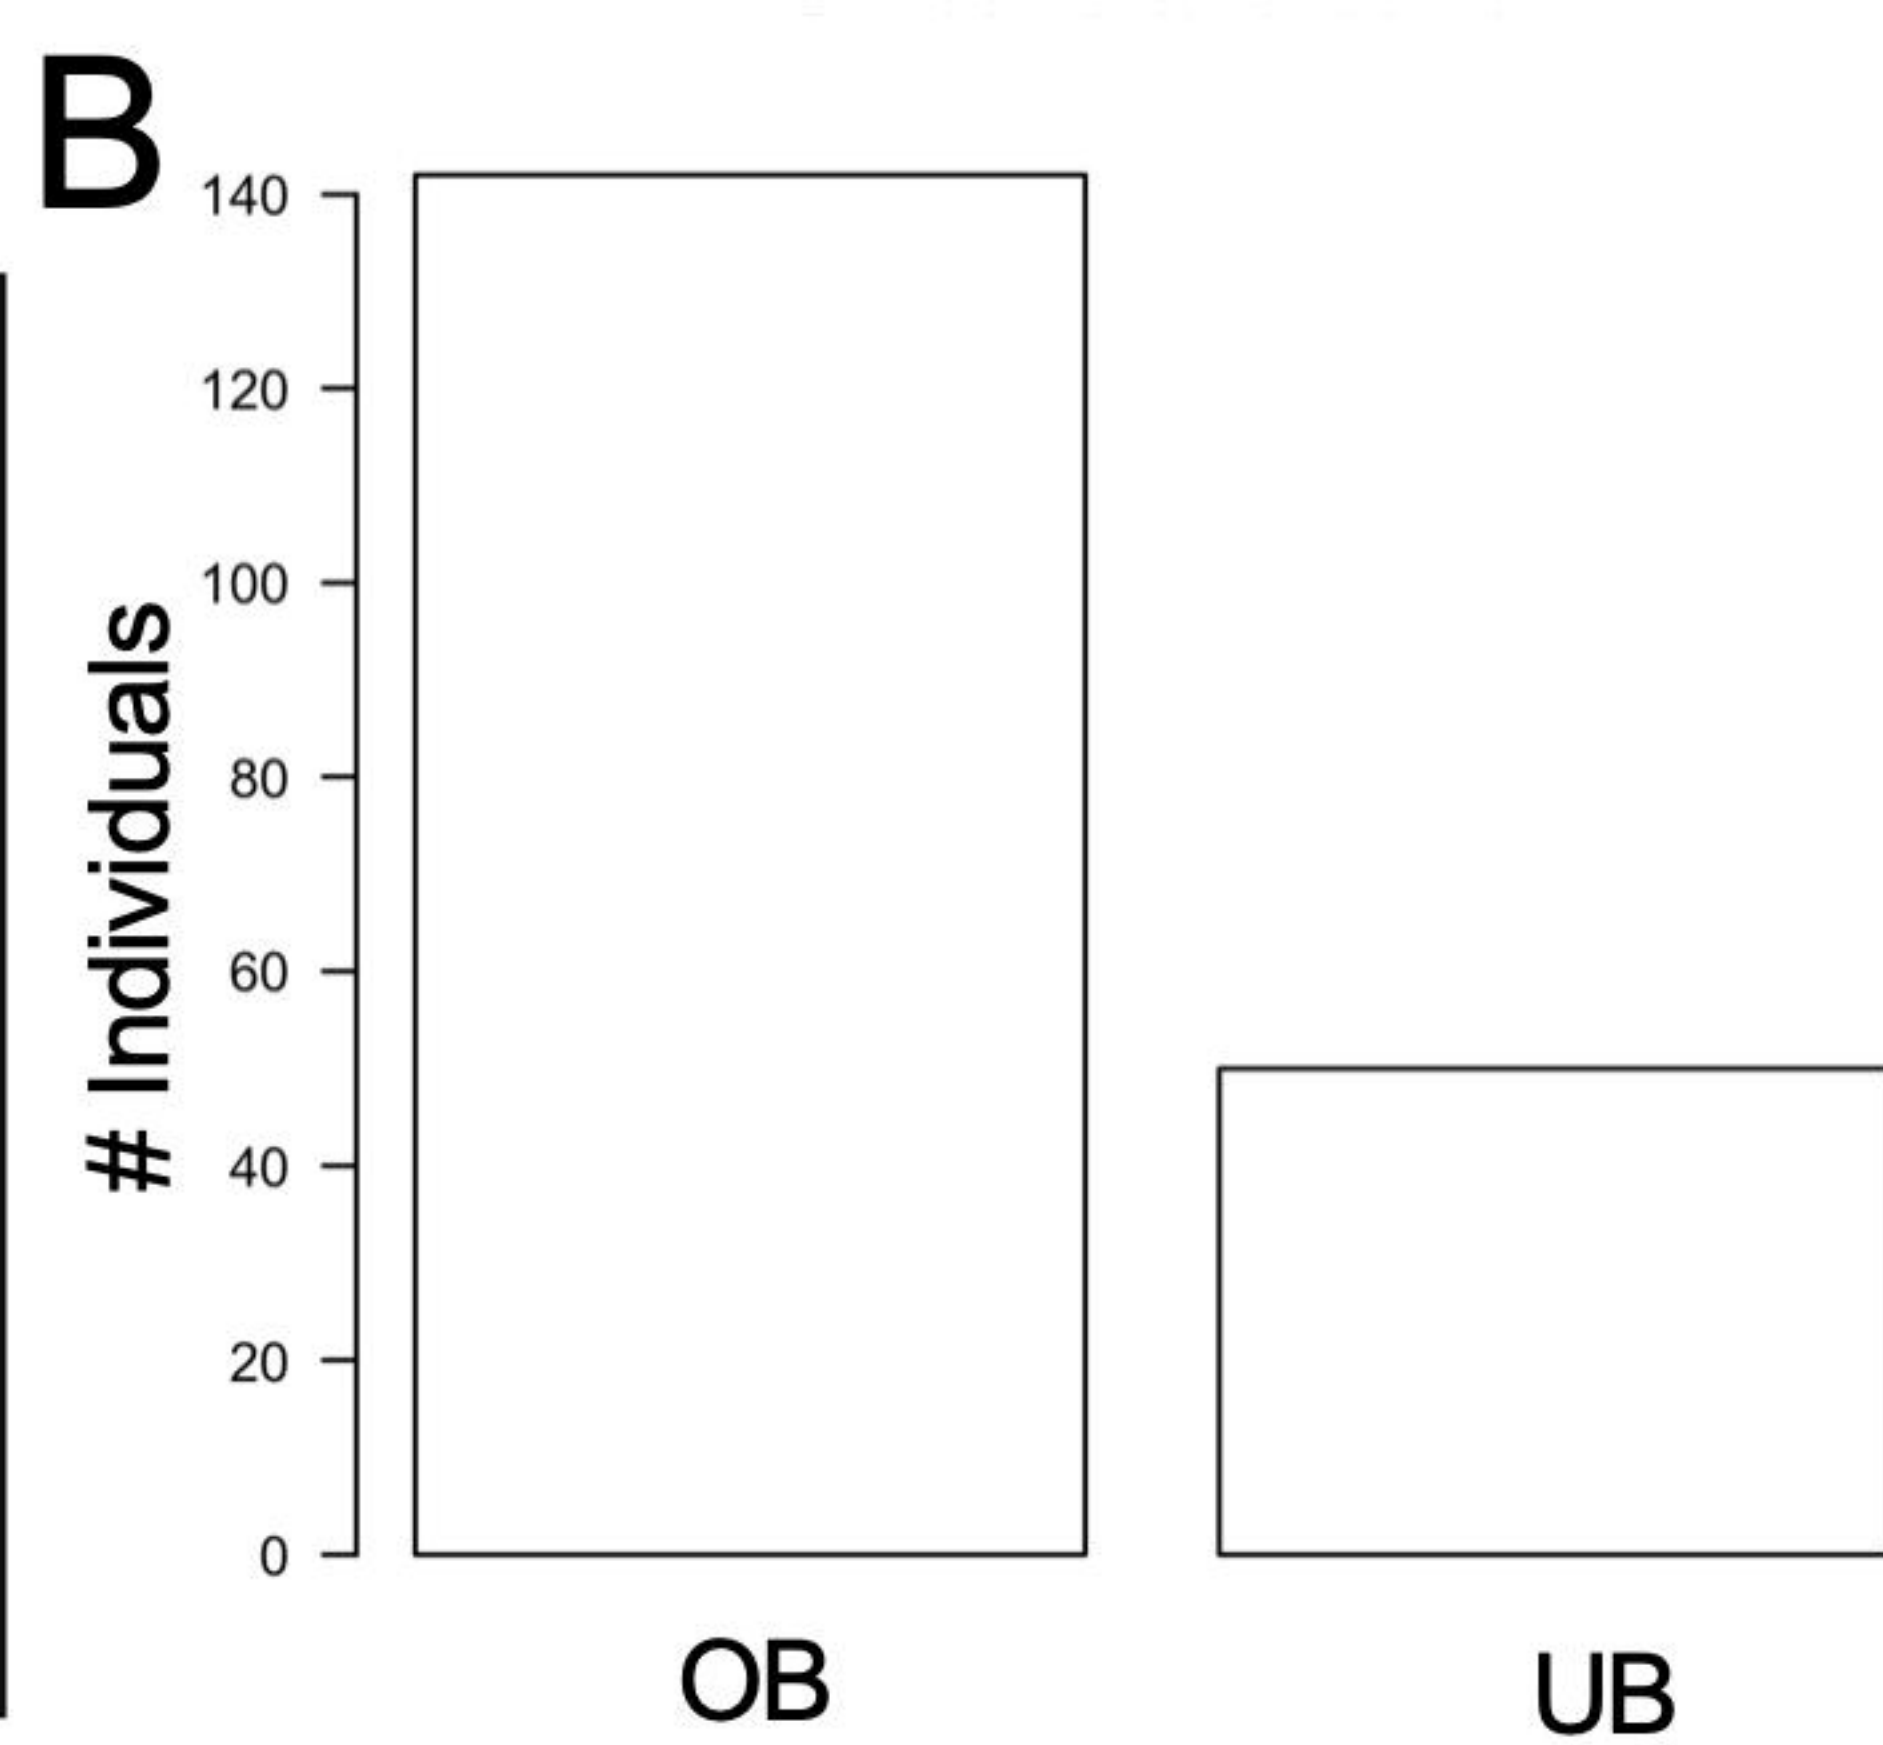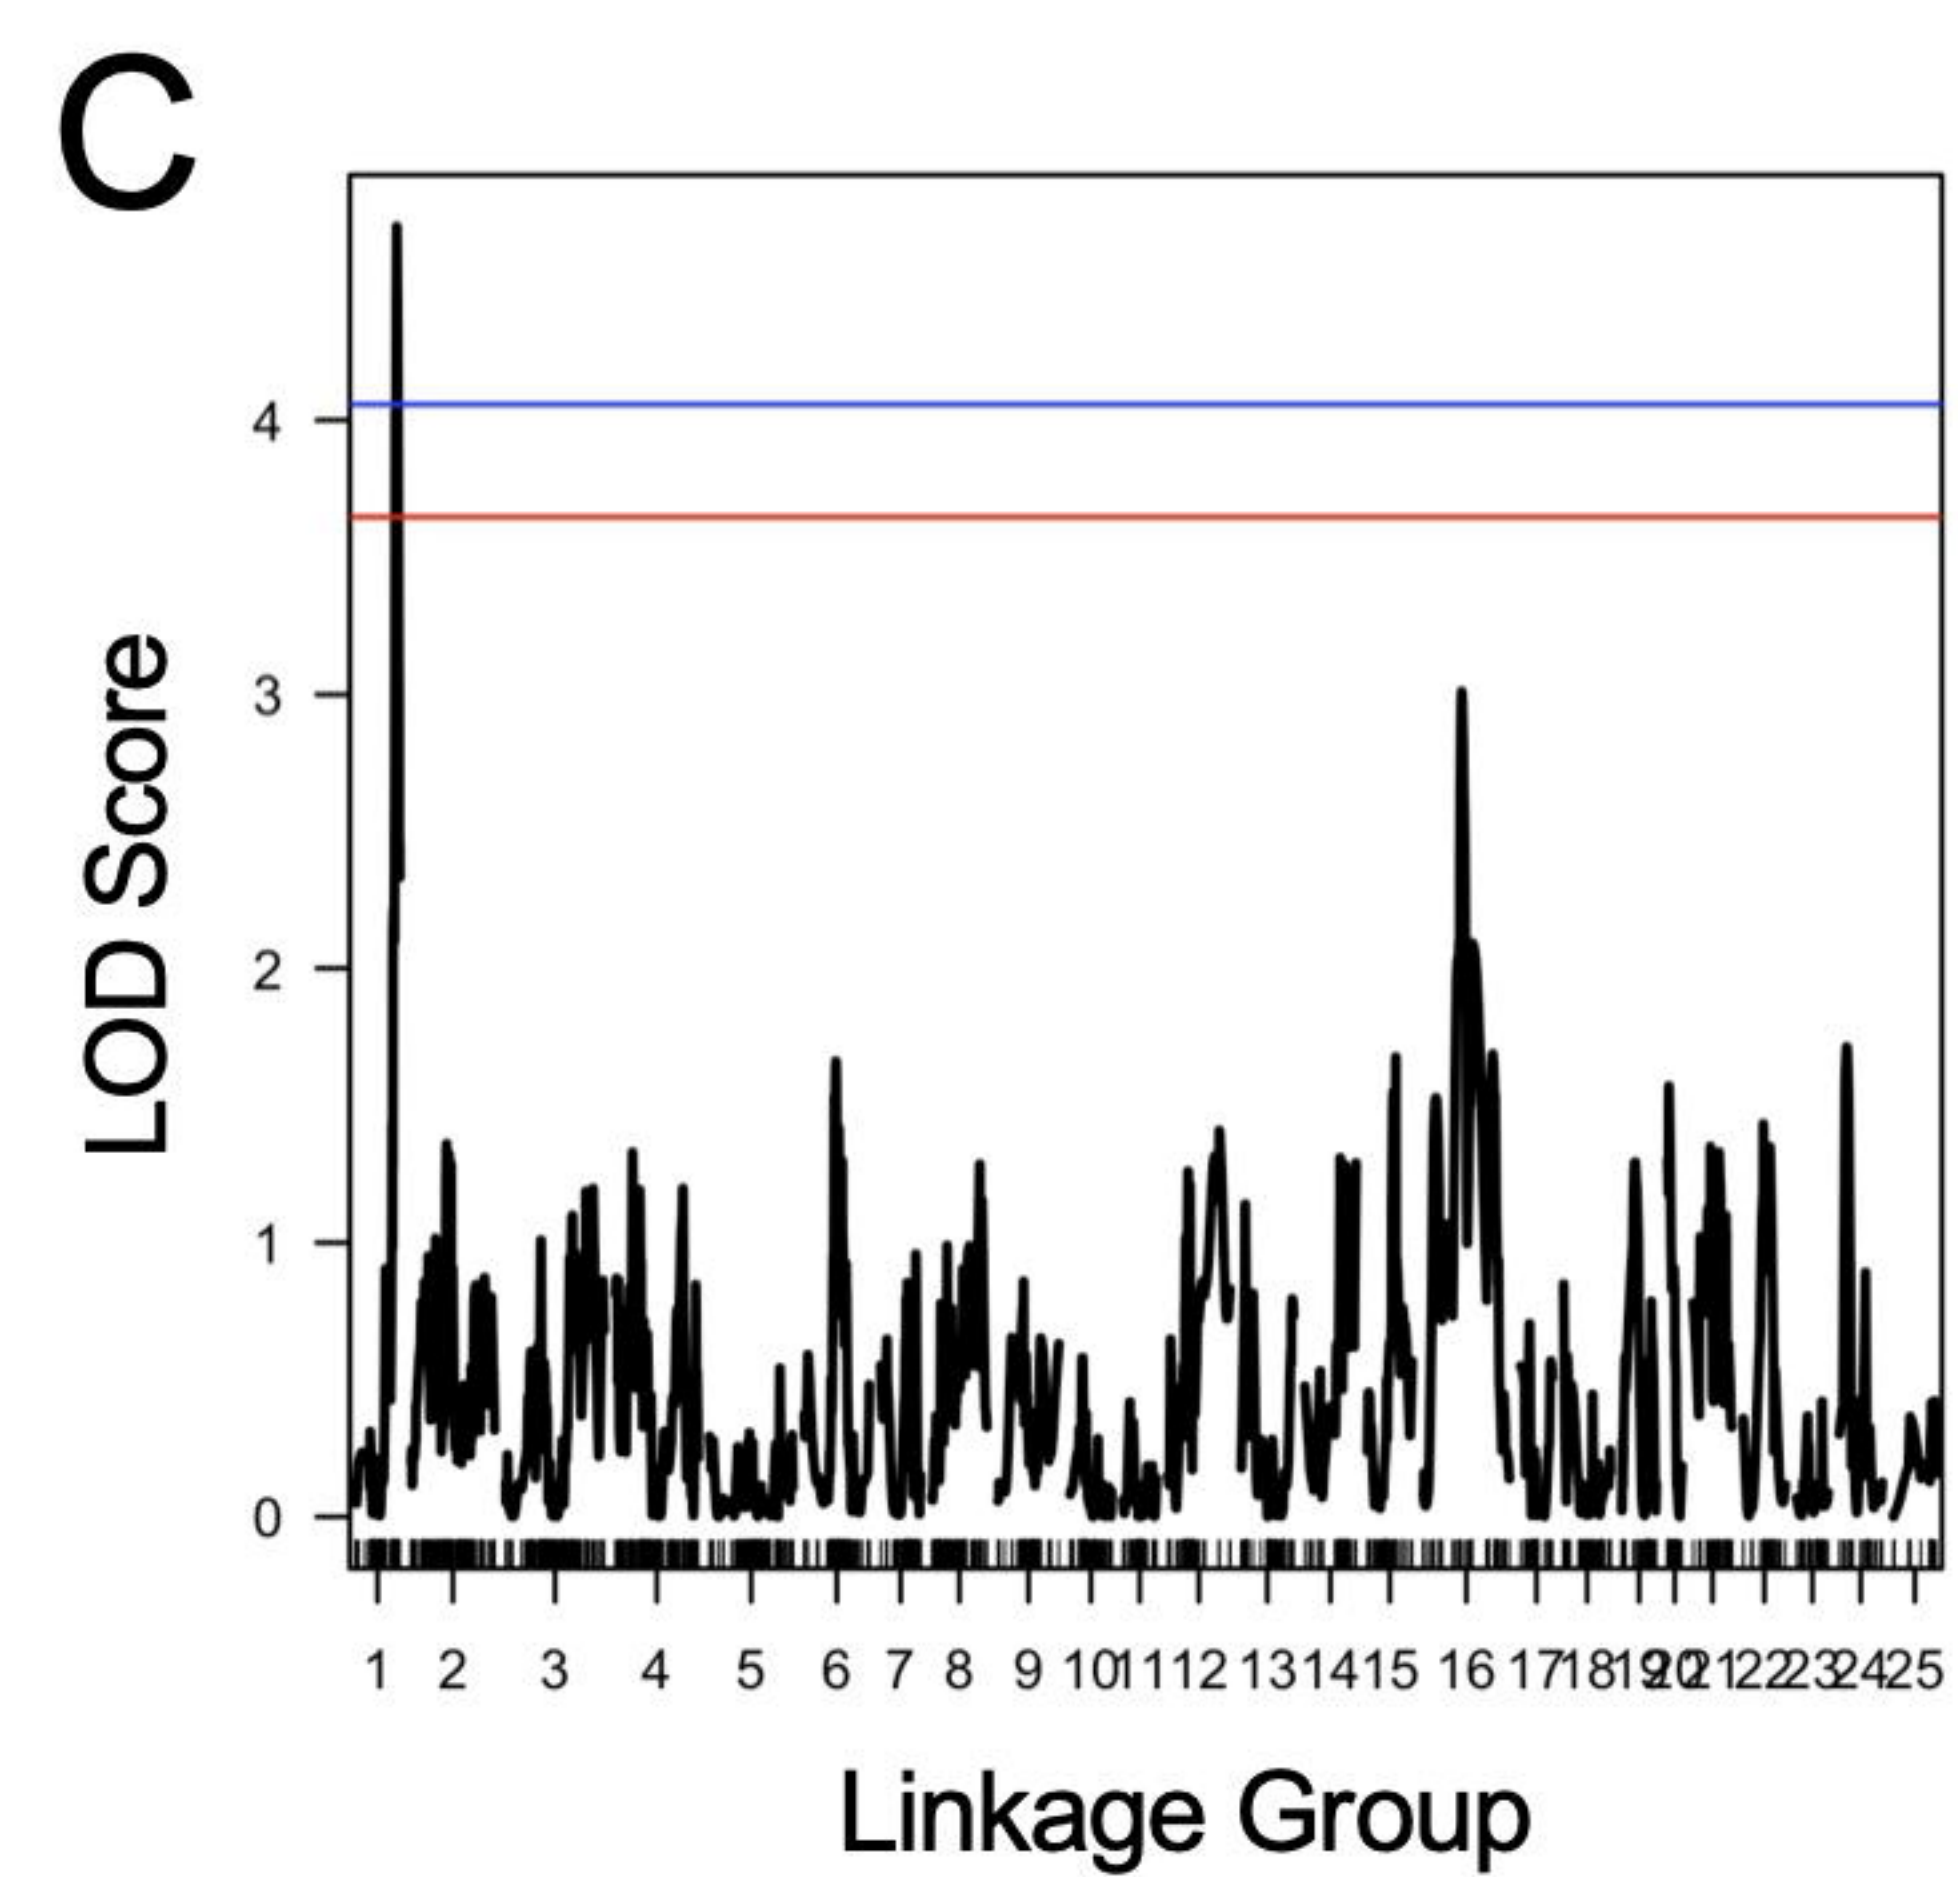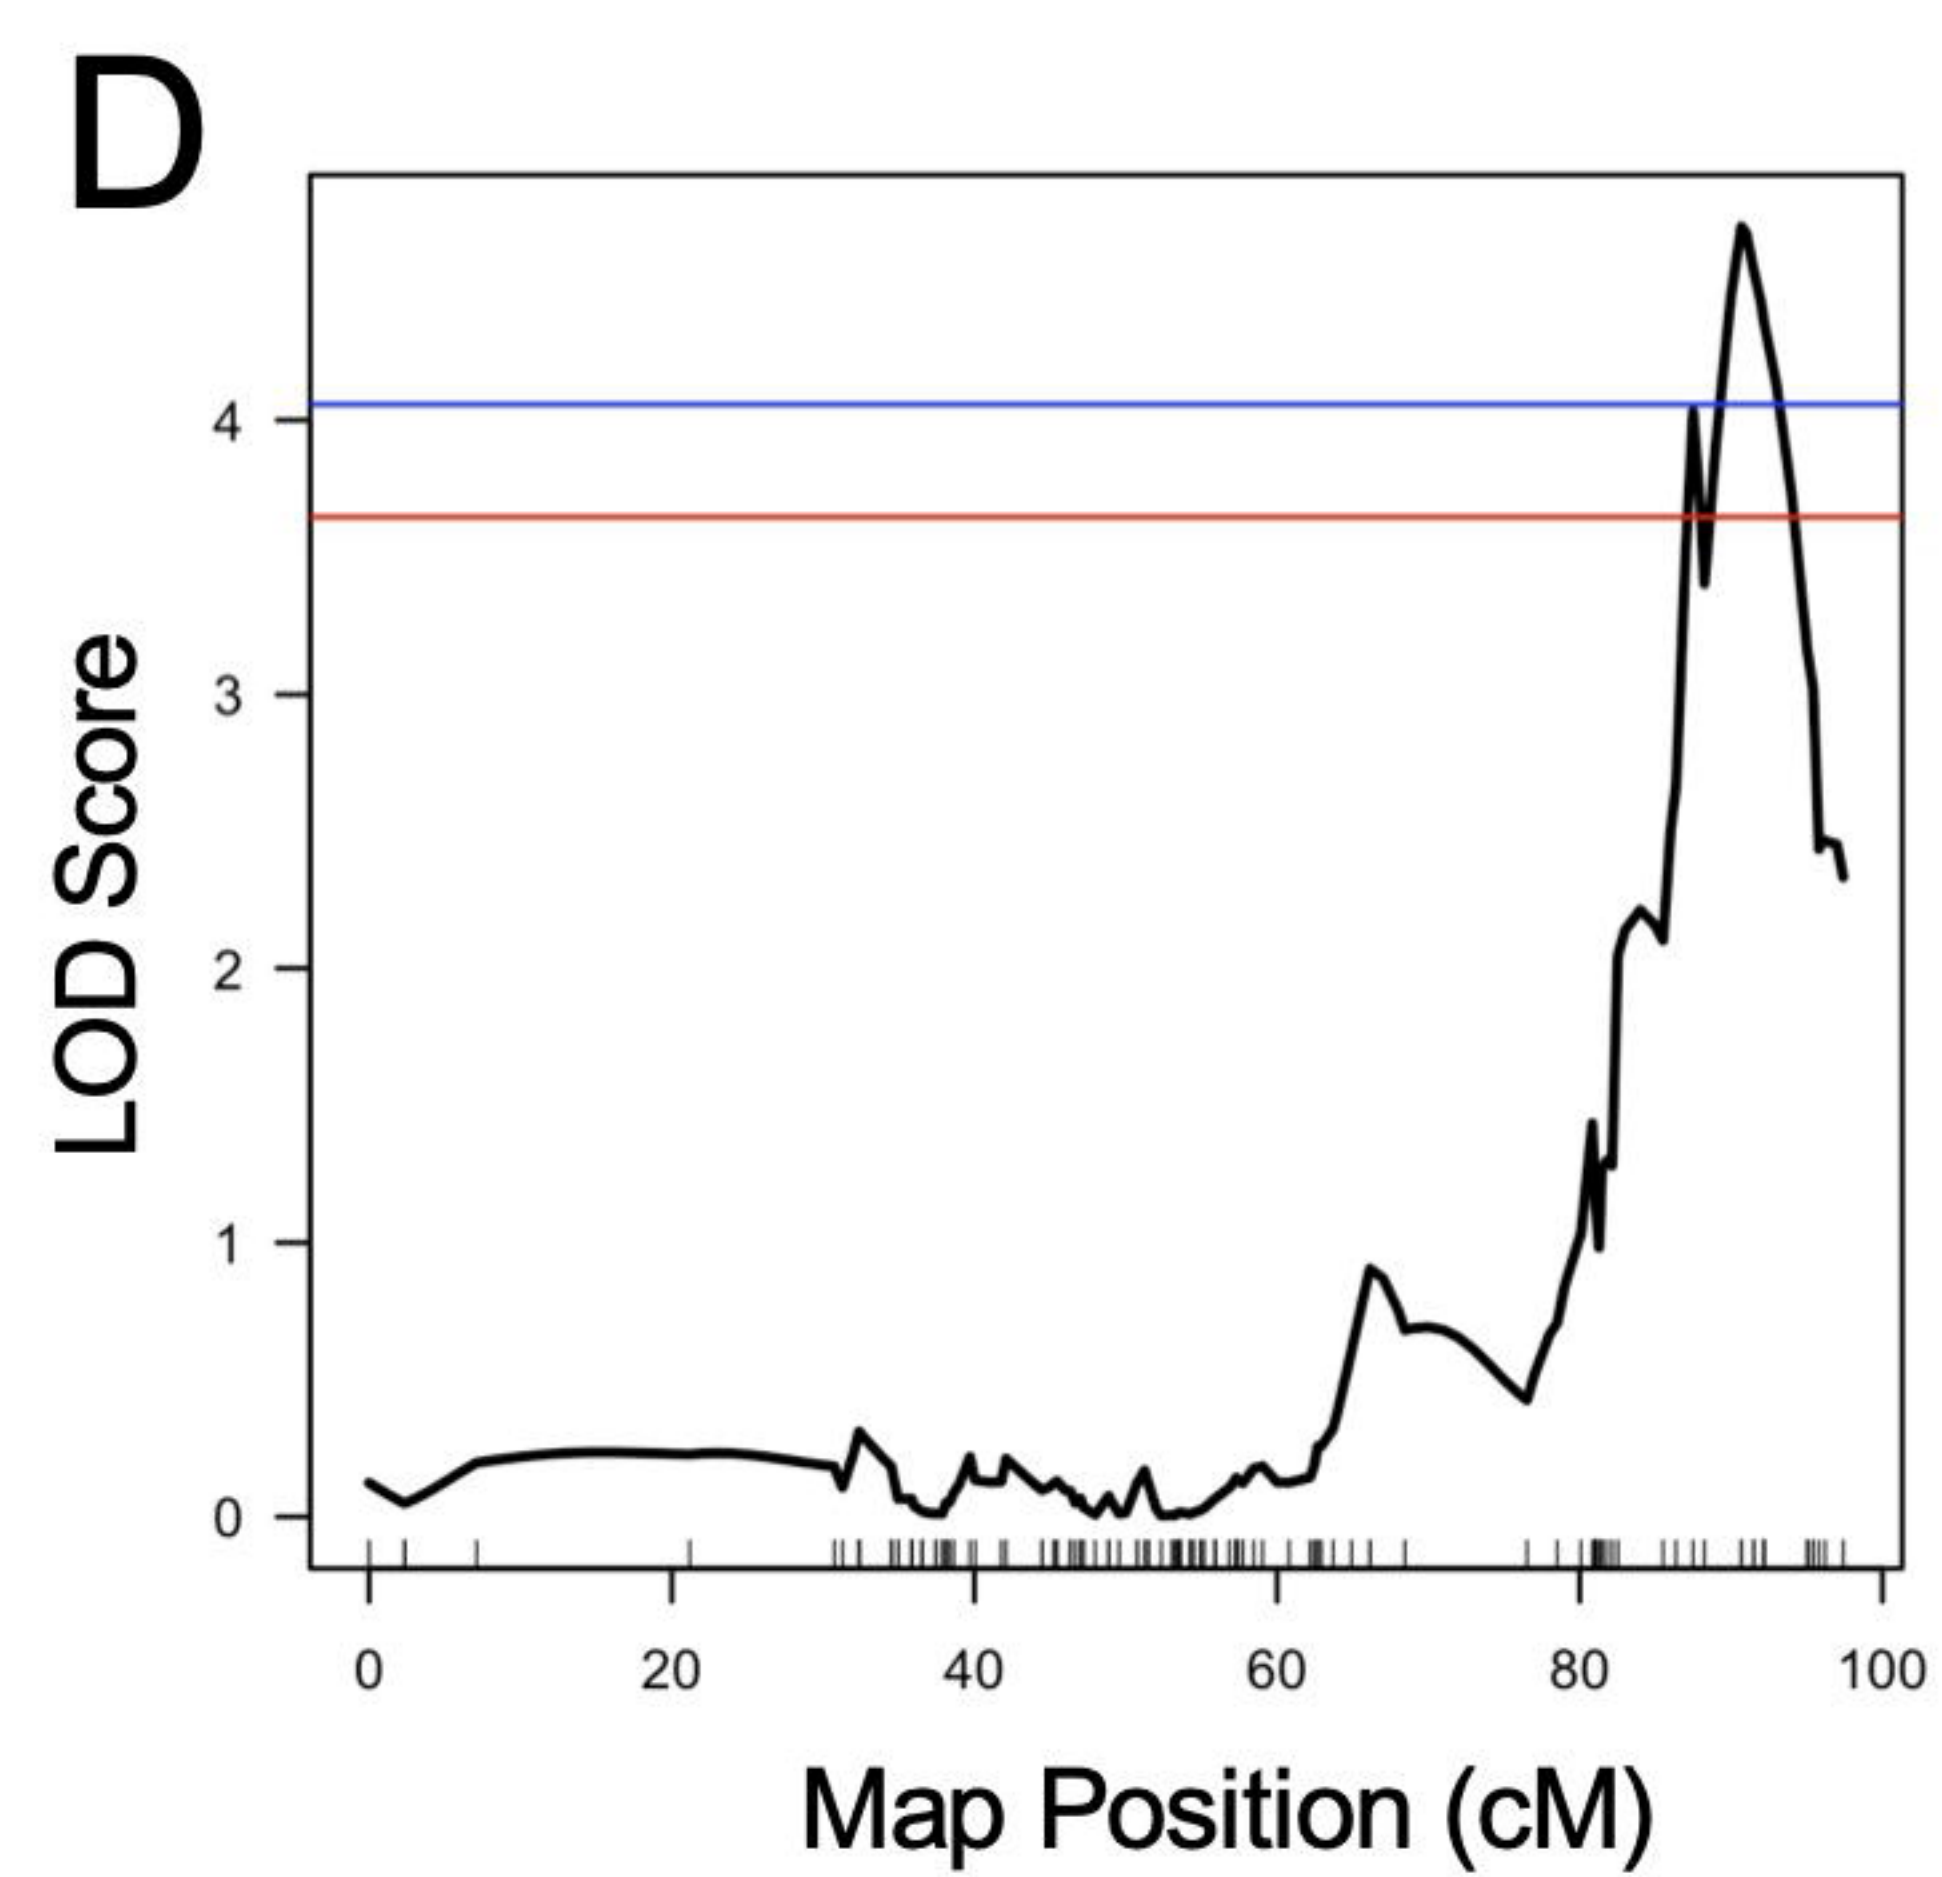

bioRxiv preprint doi: <https://doi.org/10.1101/2022.11.23.517171>; this version posted November 23, 2022. The copyright holder for this preprint (which was not certified by peer review) is the author/funder. All rights reserved. No reuse allowed without permission.

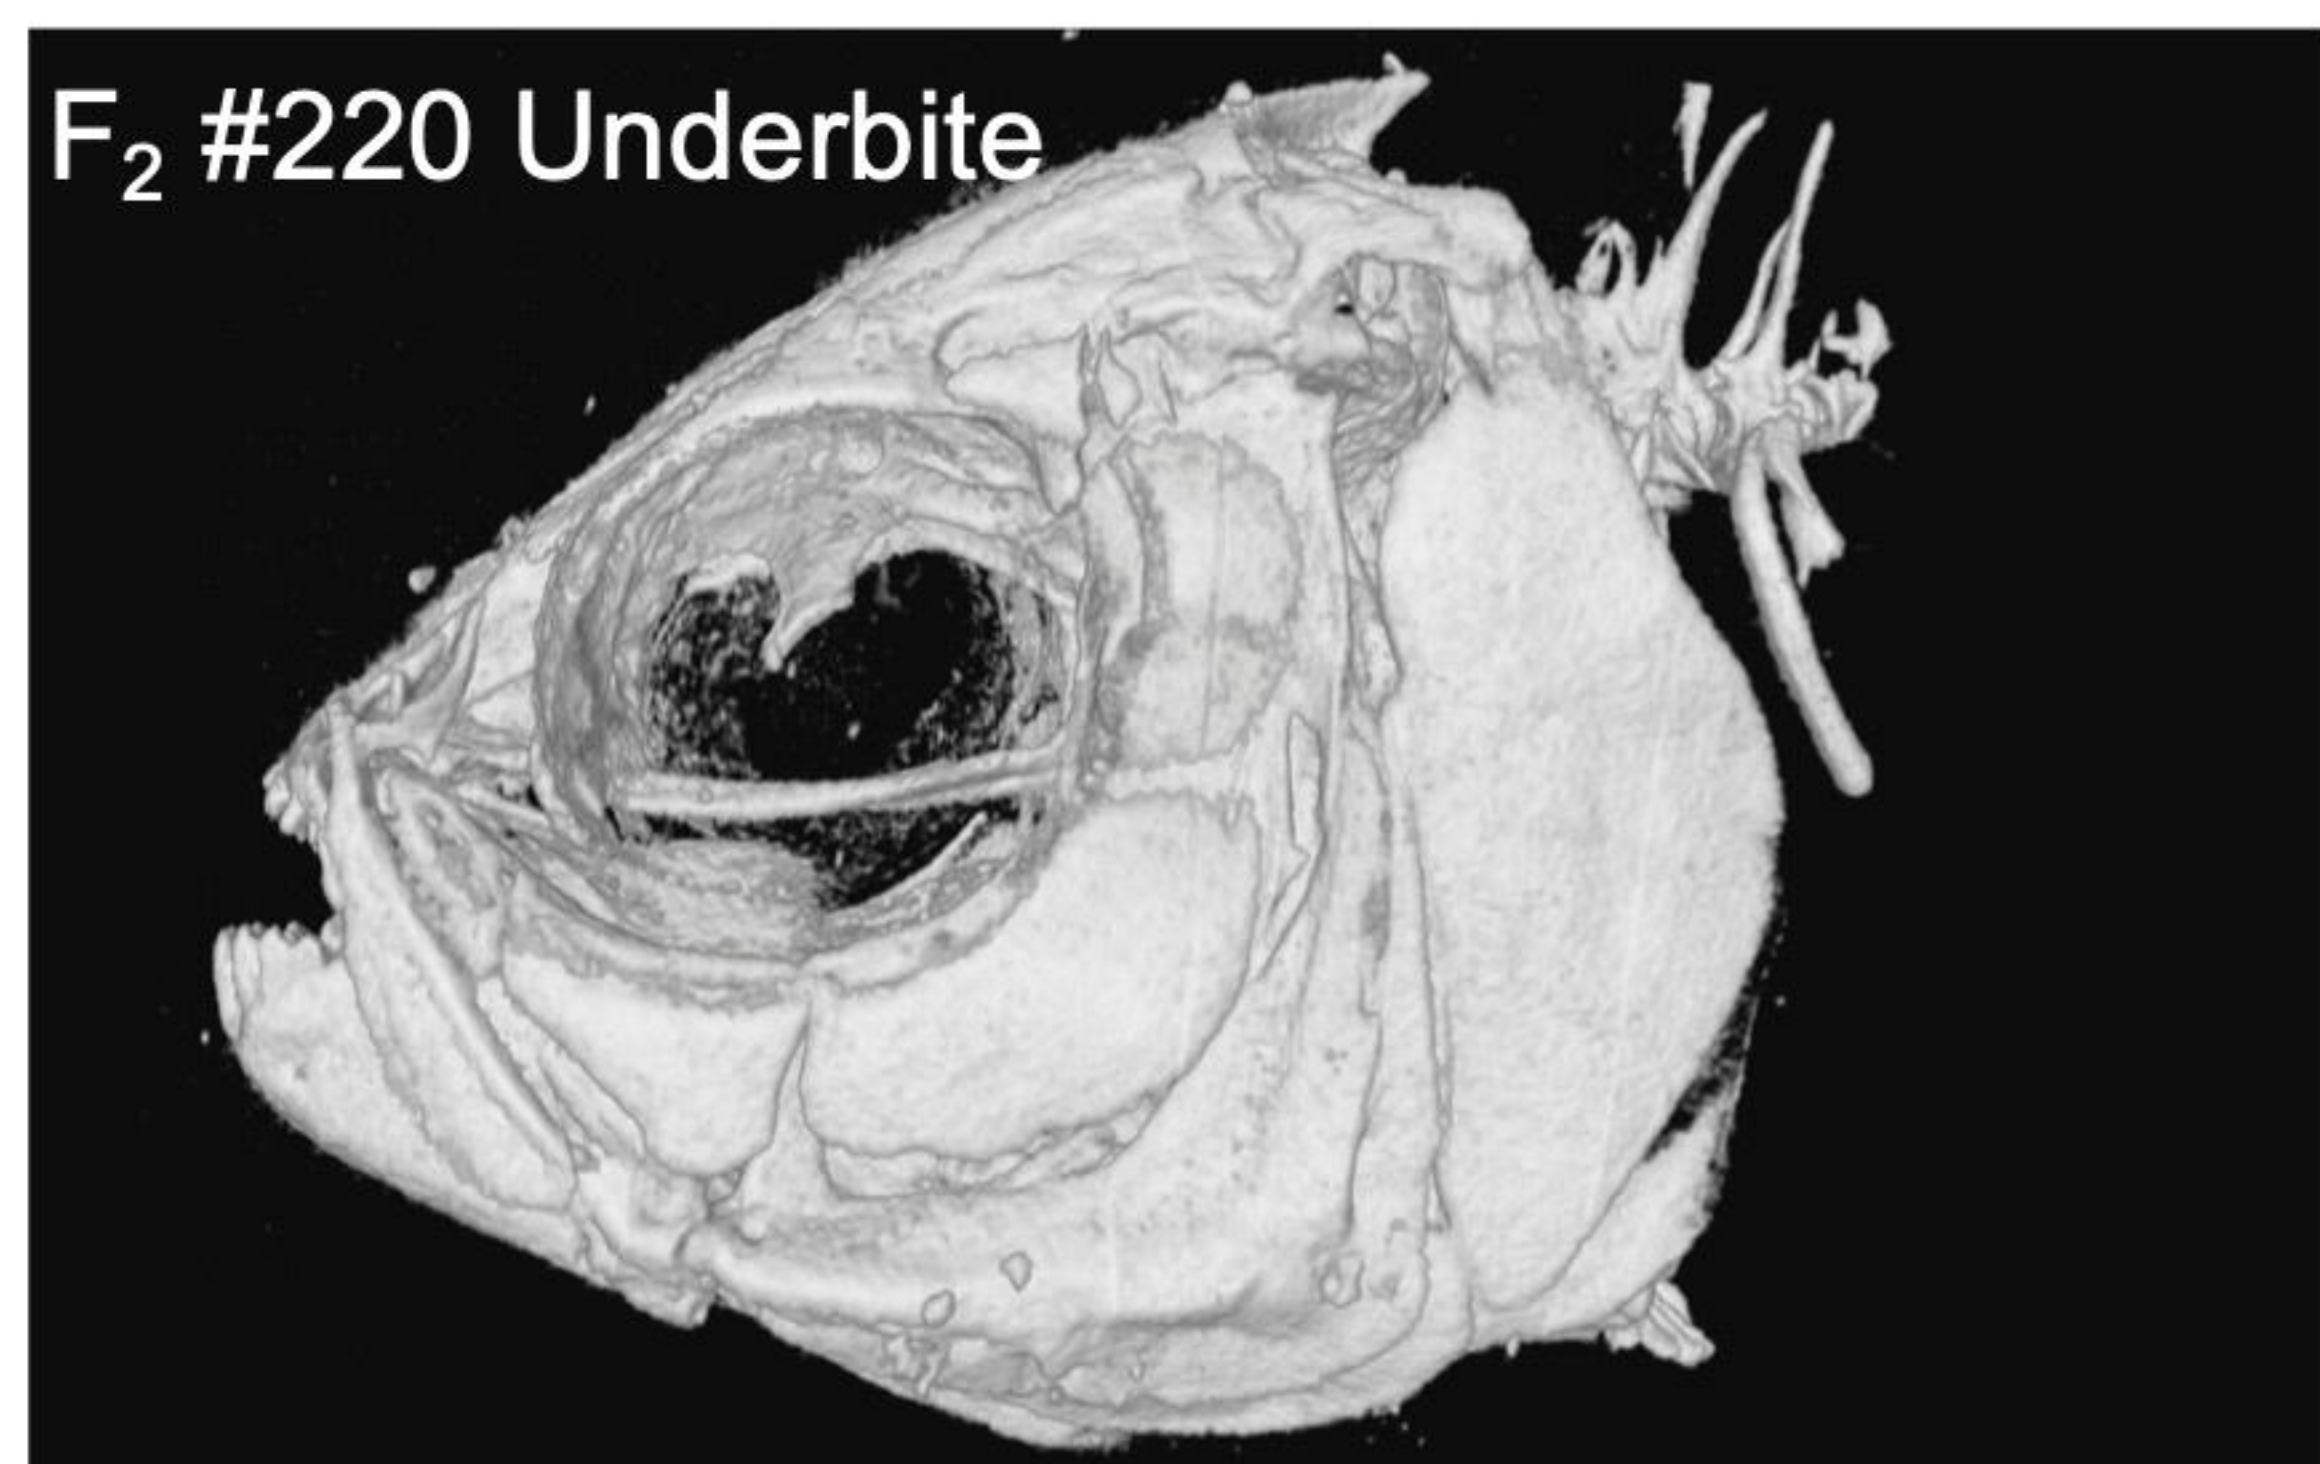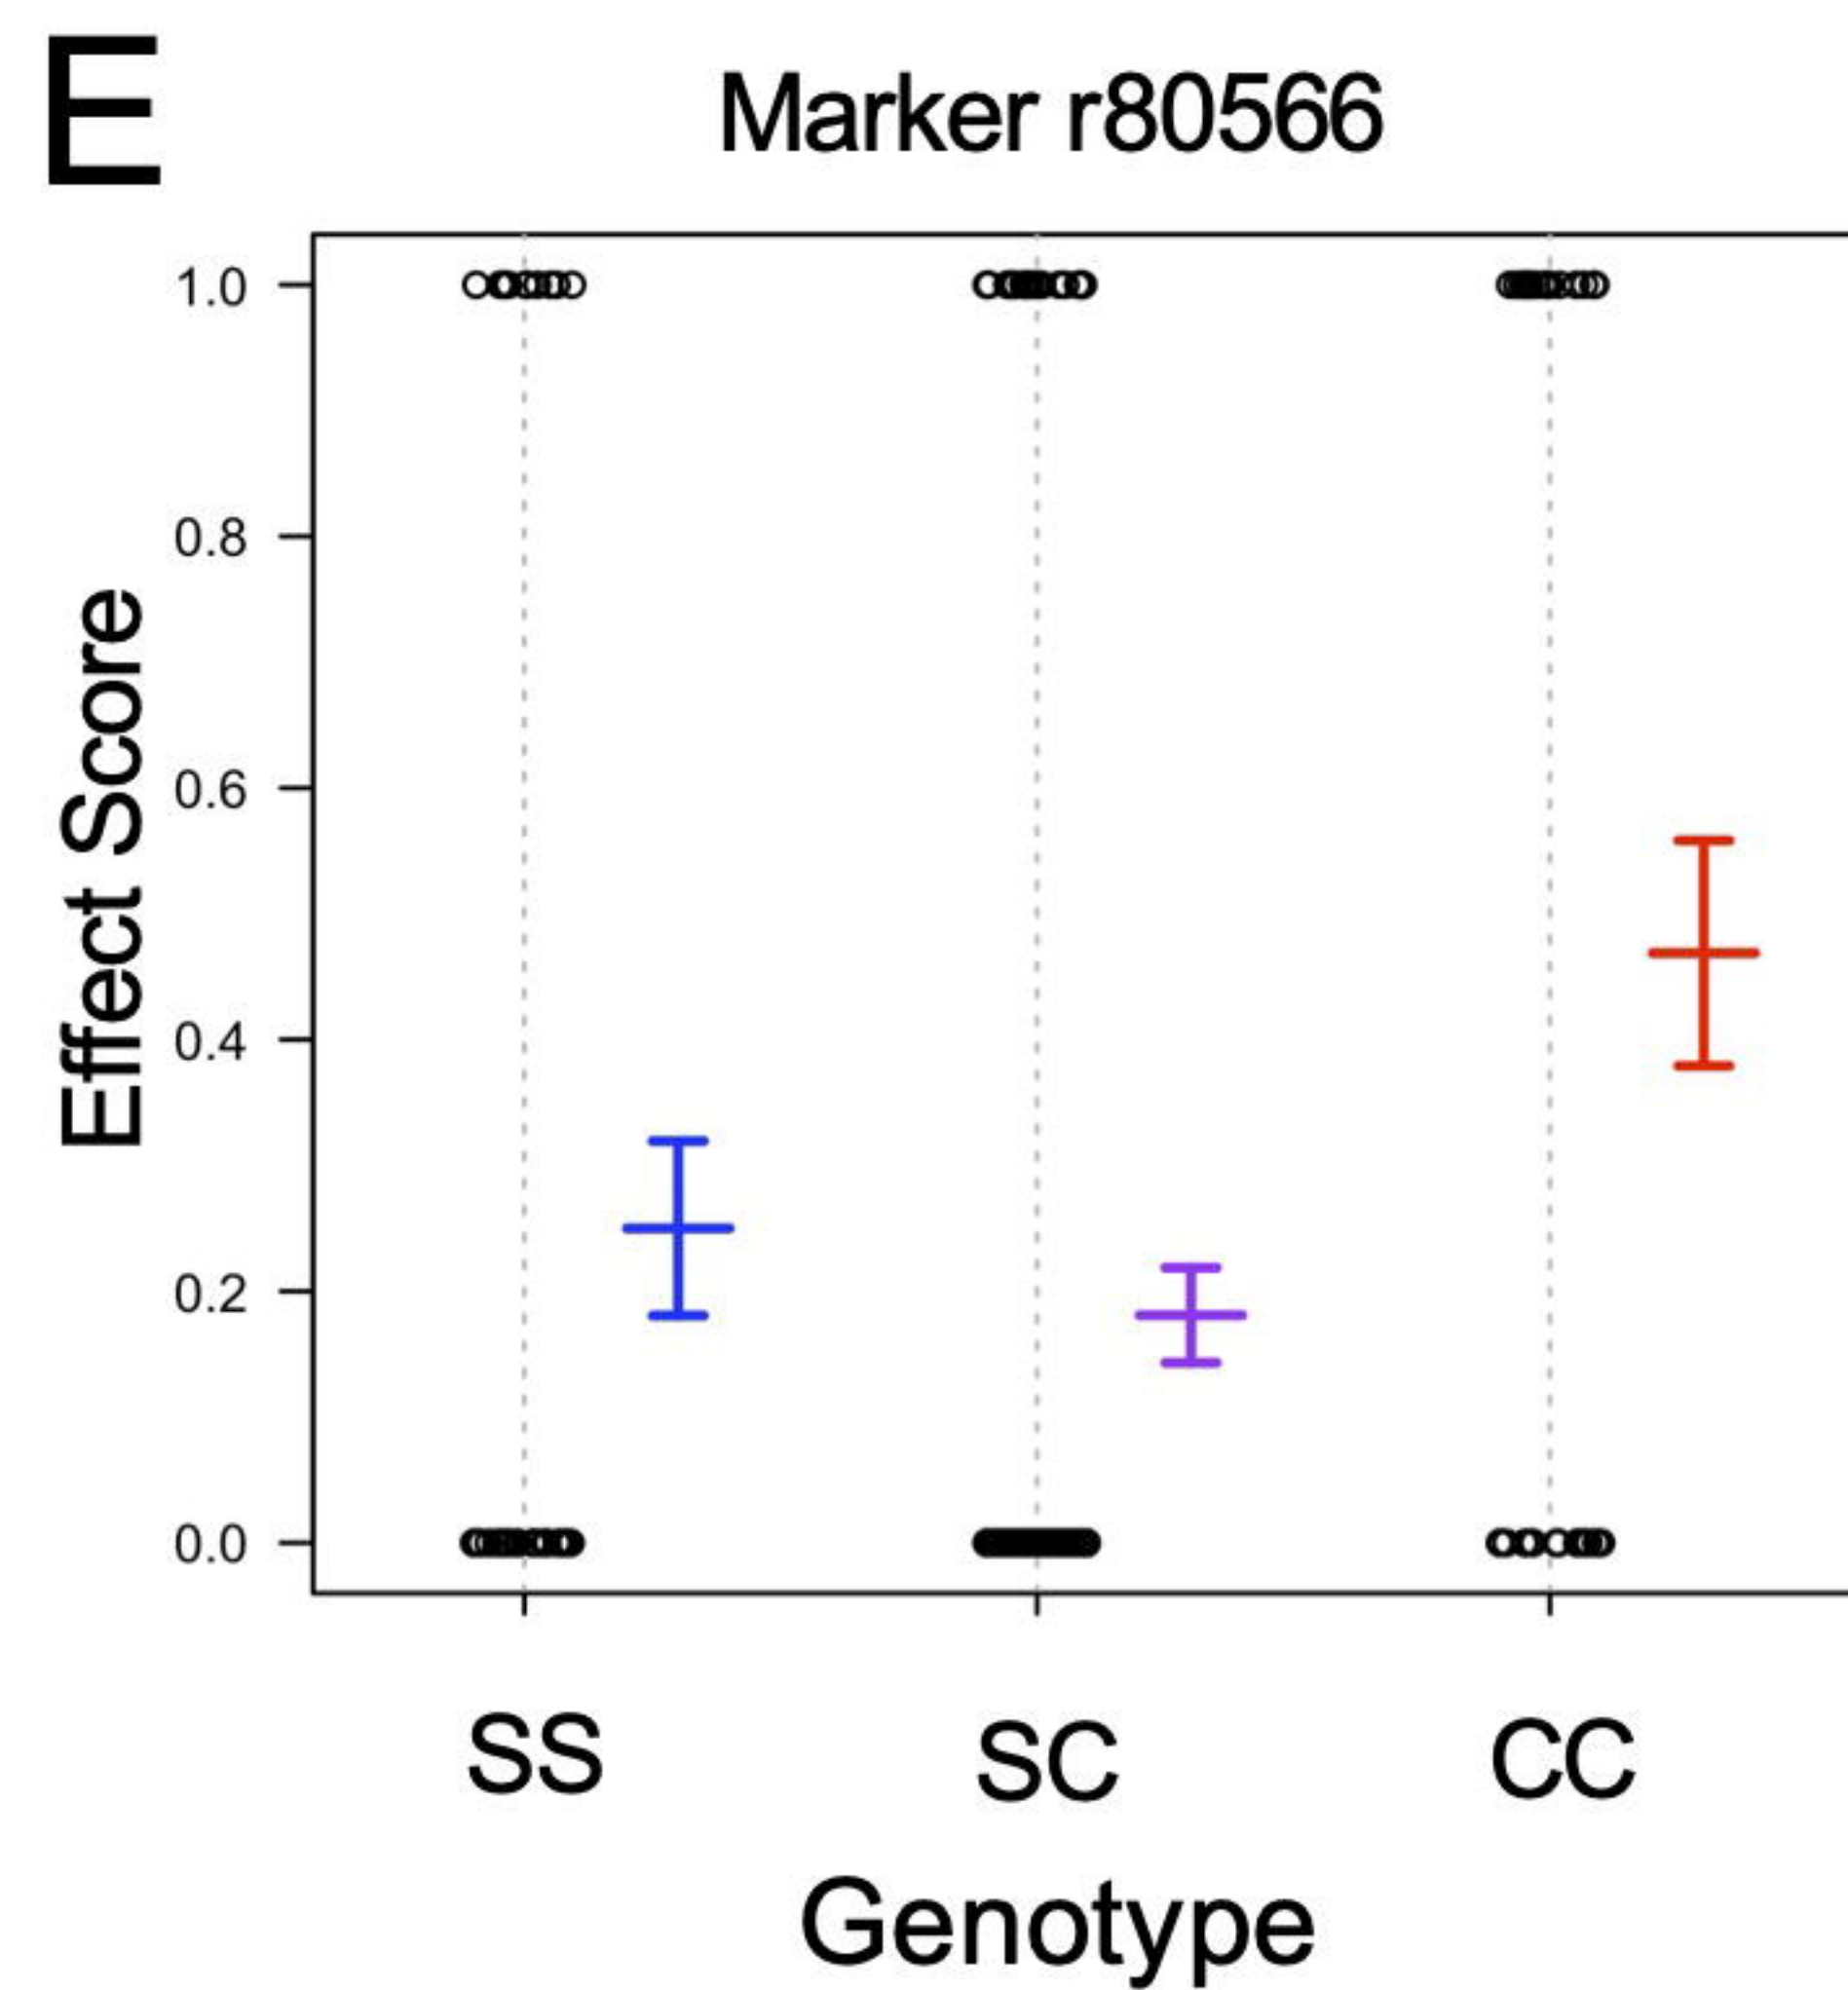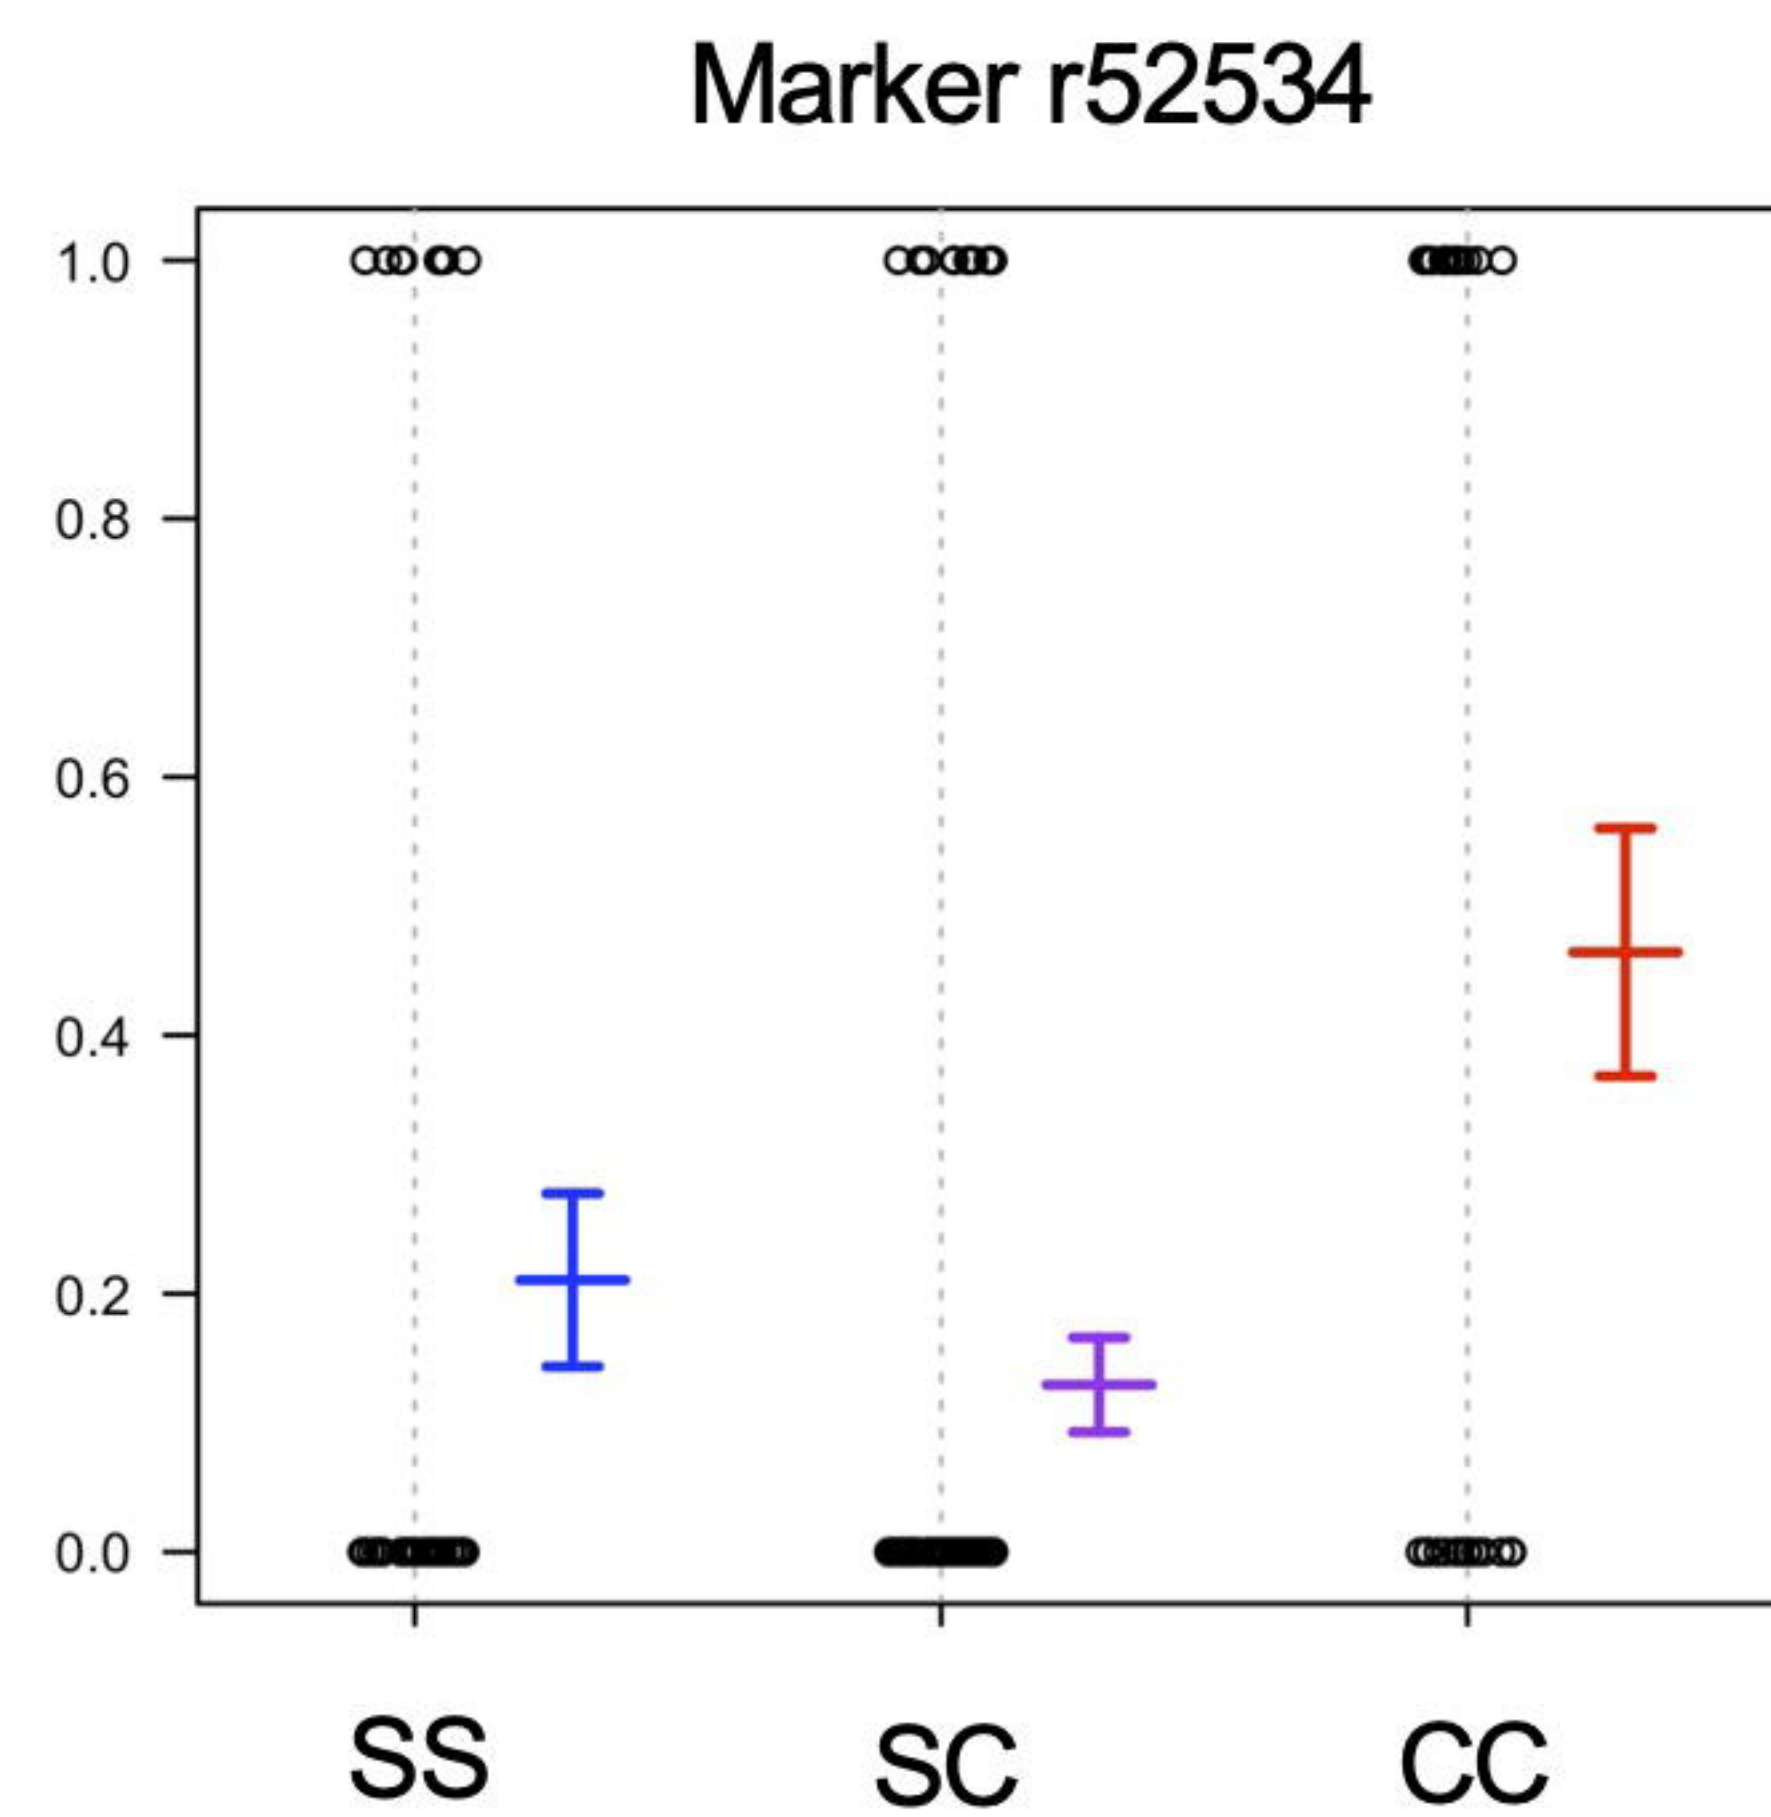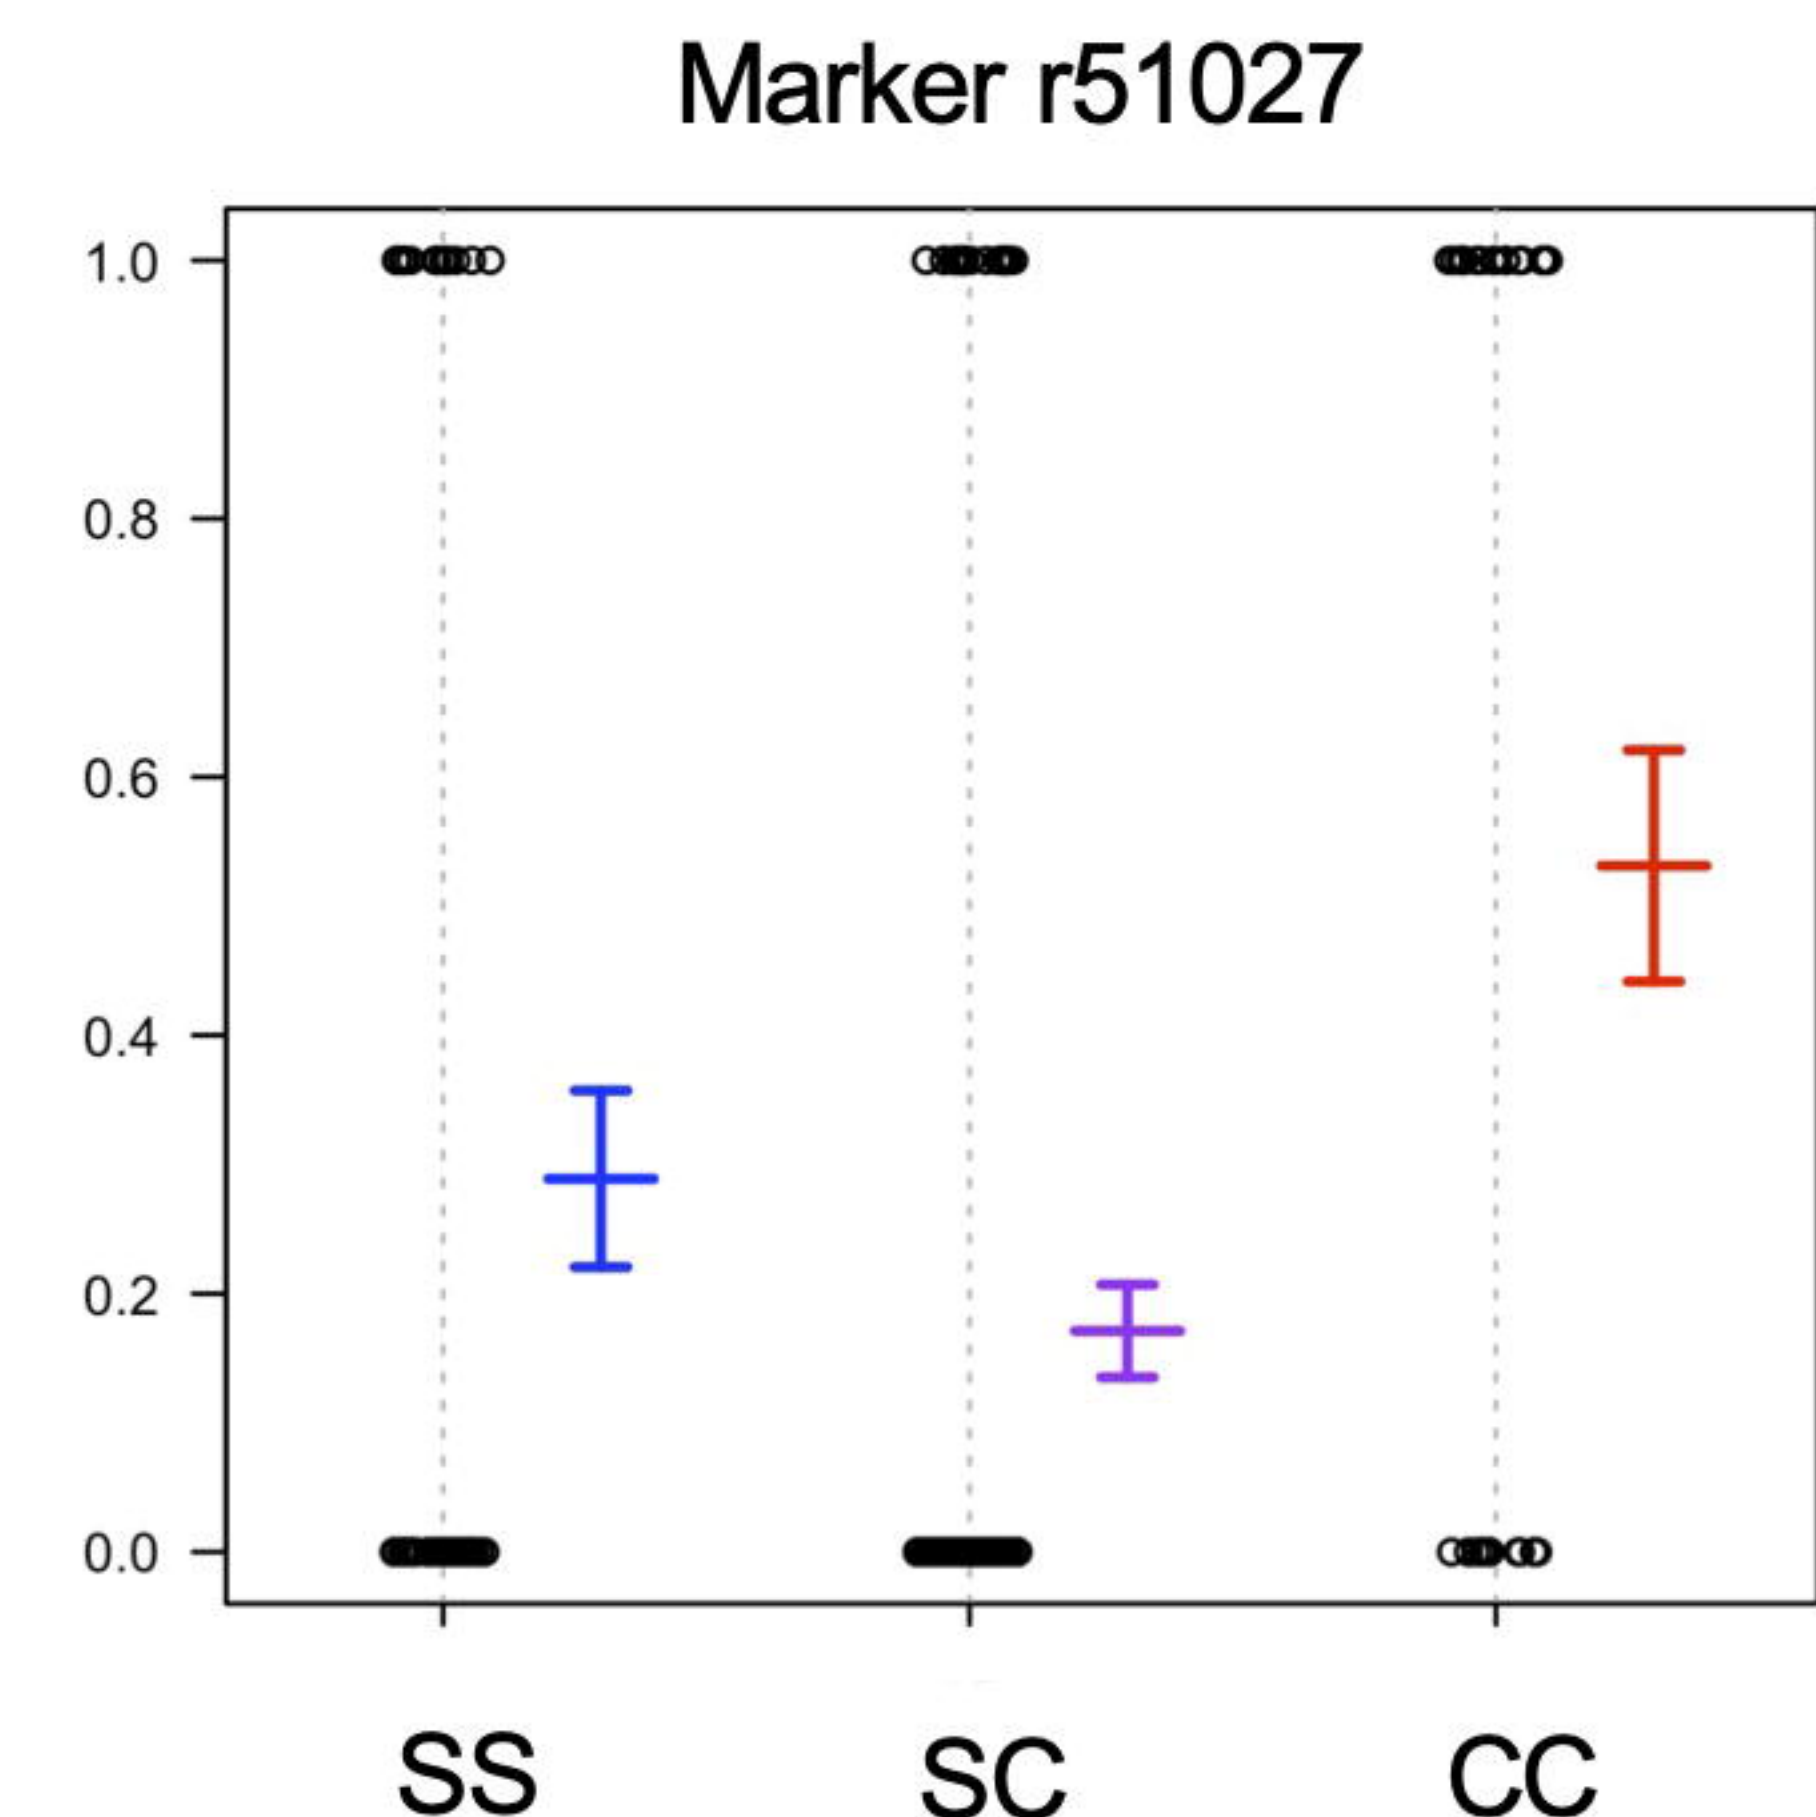



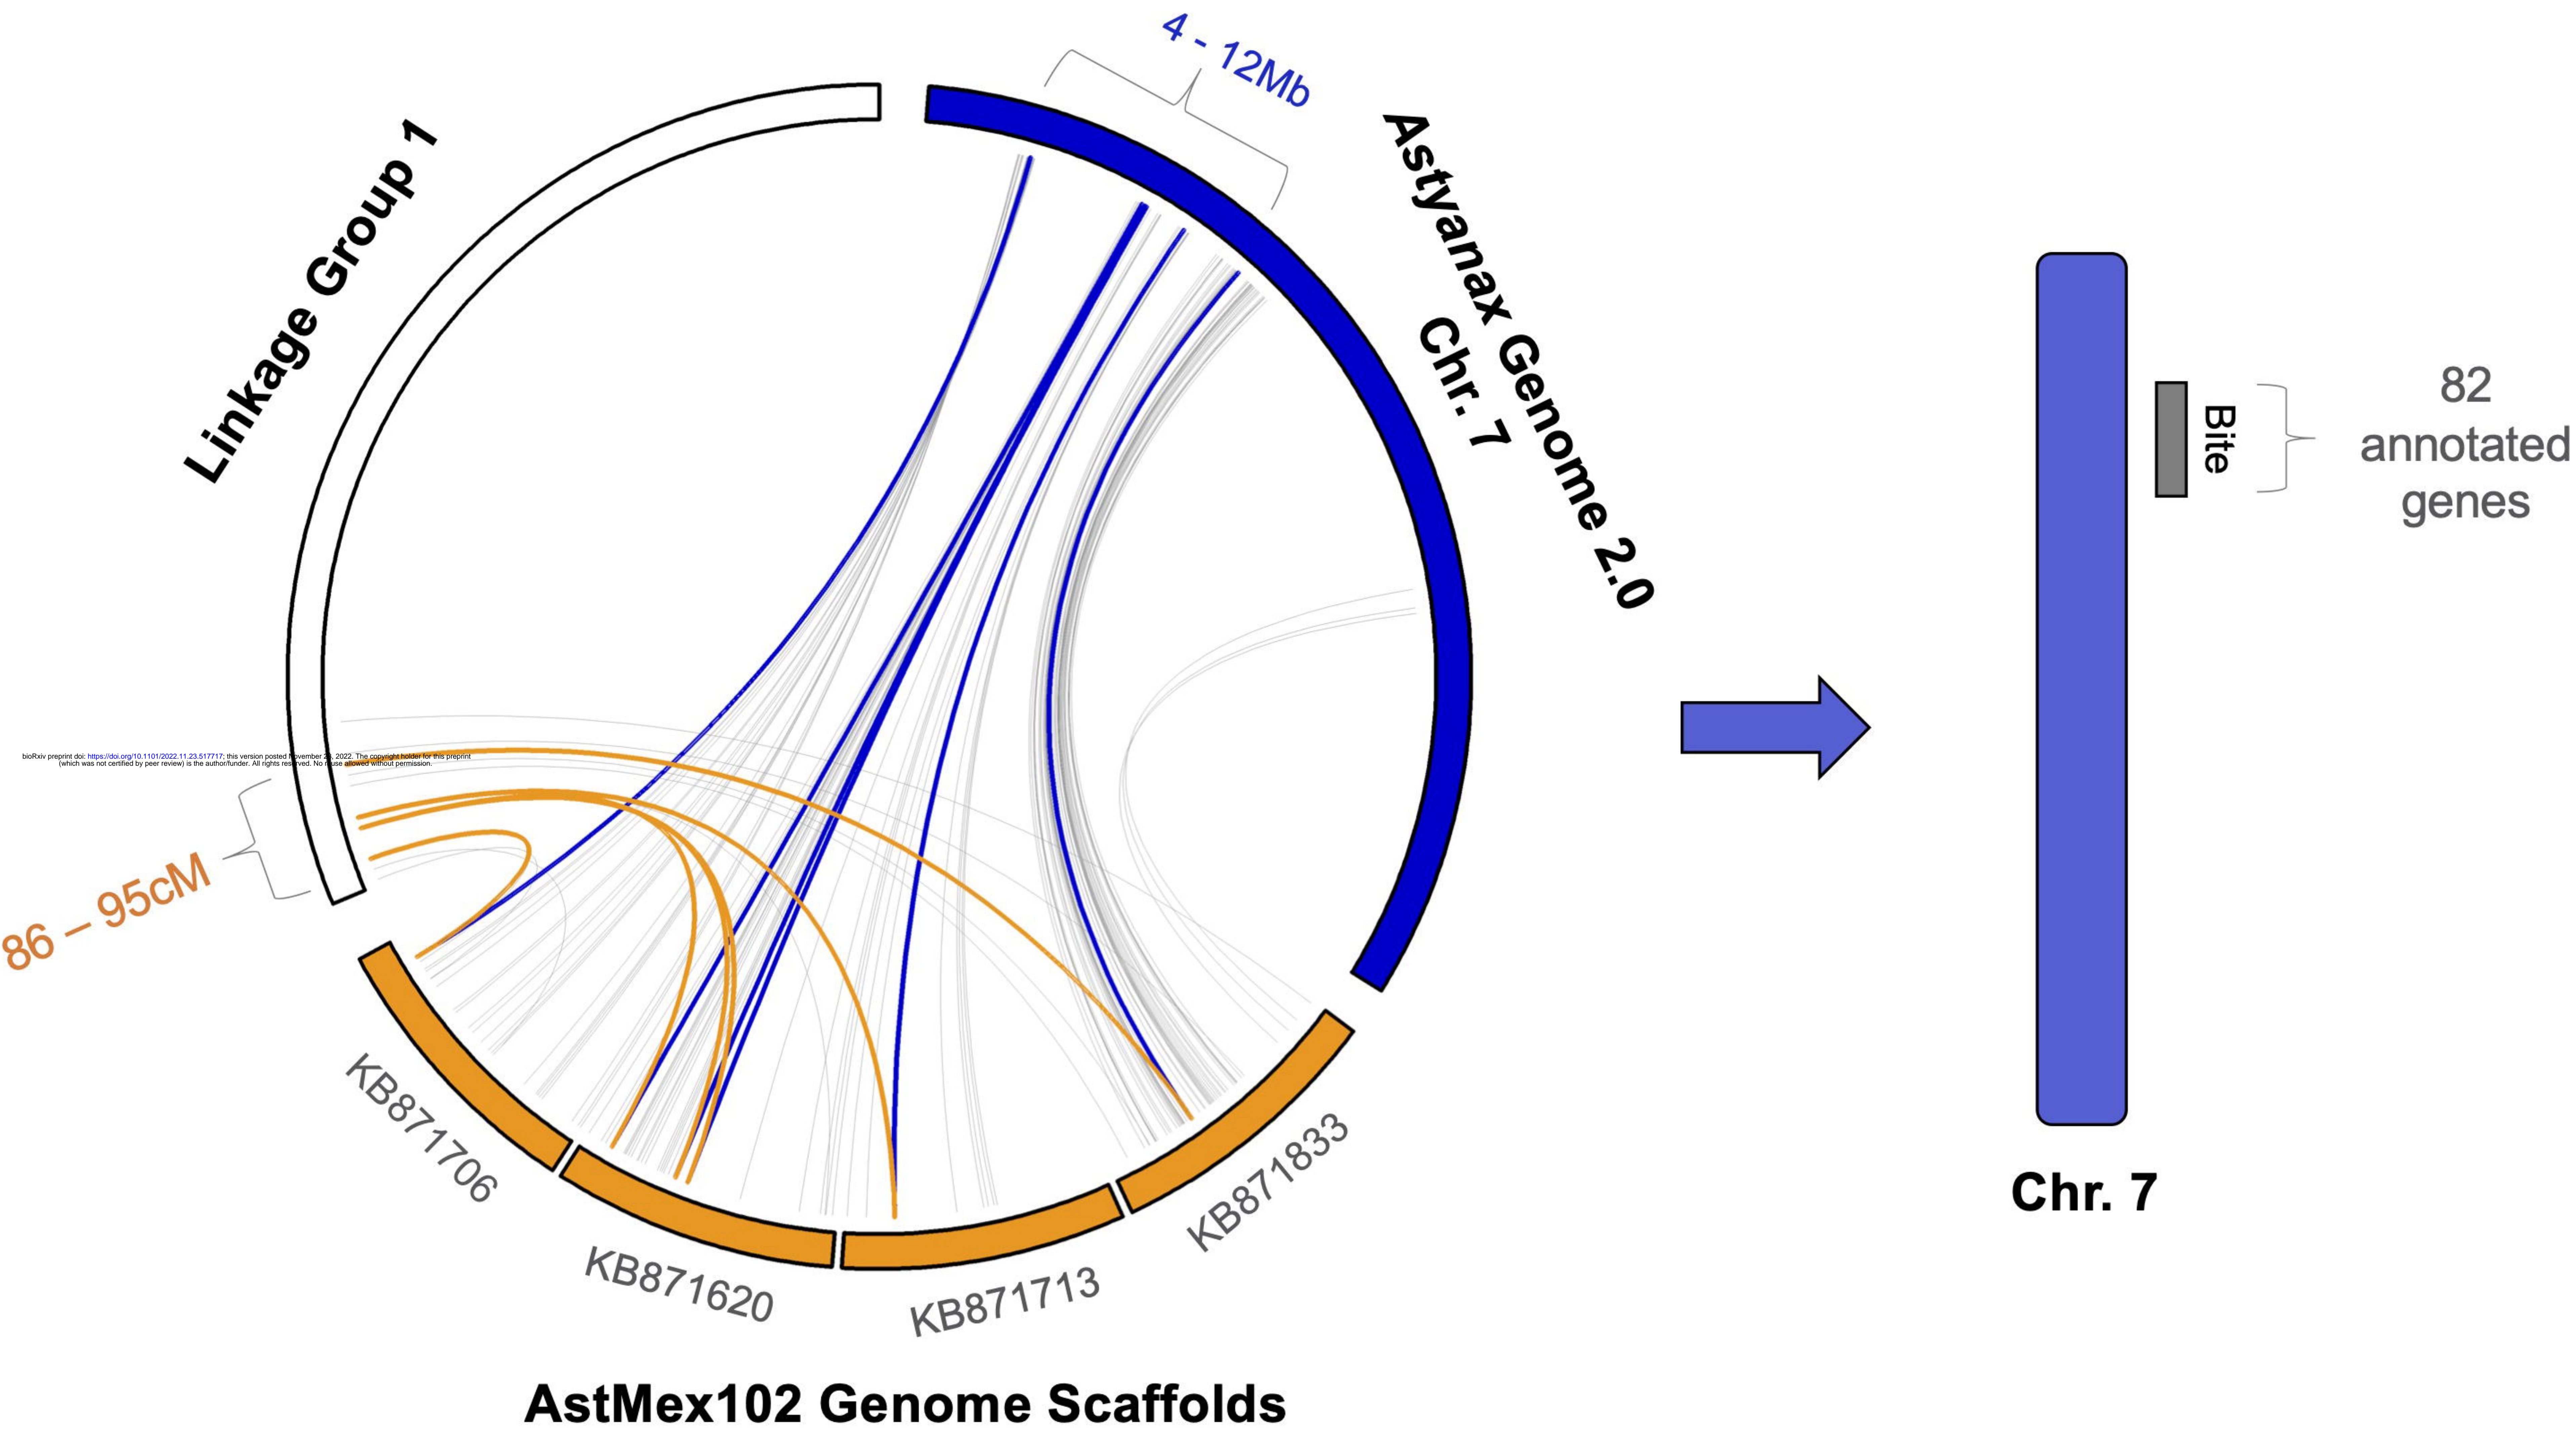

bioRxiv preprint doi: <https://doi.org/10.1101/2022.11.23.517717>; this version posted November 23, 2022. The copyright holder for this preprint (which was not certified by peer review) is the author/funder. All rights reserved. No reuse allowed without permission.



**Table 1. Genetic alterations identified in candidate genes associated with bite differences**

| <b>Gene</b>    | <b>Name</b>                                                              | <b>Location</b>   | <b>Genetic Alteration</b> | <b>Amino Acid Change</b>    | <b>Cavefish Population affected</b> |
|----------------|--------------------------------------------------------------------------|-------------------|---------------------------|-----------------------------|-------------------------------------|
| <i>RAB19</i>   | <i>RAB19, member RAS oncogene family</i>                                 | 7:8404412-8414687 | Nonsynonymous SNP         | Histidine -> Glutamine      | Pachón, Molino, and Tinaja          |
| <i>arfgap3</i> | <i>ADP ribosylation factor GTPase activating protein 3</i>               | 7:8446792-8462735 | Nonsynonymous SNP         | Proline -> Histidine        | Pachón                              |
| <i>pacsin2</i> | <i>Protein kinase C and casein kinase substrate in neurons protein 2</i> | 7:8464067-8496854 | Nonsynonymous SNP         | Phenylalanine -> Leucine    | Pachón and Molino                   |
| <i>large1</i>  | <i>LARGE xylosyl- and glucuronyltransferase 1</i>                        | 7:9076709-9165670 | Nonsynonymous SNP         | Aspartic acid -> Asparagine | Pachón, Molino, and Tinaja          |
| <i>USP15</i>   | <i>ubiquitin specific peptidase 15</i>                                   | 7:9928859-9967471 | 1-13bp deletions          | -                           | Pachón, Molino, and Tinaja          |
